# Supplementary material for: Absorption of chemicals in amorphous trisresorcinarene
Source: Royal Society of Chemistry journal article supplement (doi:10.1039/d0cc05066k), 2020-01-01
Supplement: d0cc05066k1.pdf [file d0cc05066k1.pdf]

## **- Electronic Supplementary Information -**

# **Absorption of Chemicals in Amorphous Trisresorcinarene**

Daisuke Shimoyama, Ryo Sekiya, and Takeharu Haino\*

Department of Chemistry, Graduate School of Advanced Science and Engineering, Hiroshima University,

1-3-1 Kagamiyama, Higashi-Hiroshima, Hiroshima 739-8526, Japan

To whom correspondence should be addressed

[haino@hiroshima-u.ac.jp](mailto:haino@hiroshima-u.ac.jp)

# Contents

## Experimental Section

|                                               |        |
|-----------------------------------------------|--------|
| • General                                     | ... S4 |
| • Computational methods                       | ... S4 |
| • Experimental procedure of the absorption    | ... S4 |
| • X-ray crystallography                       | ... S4 |
| • <b>Table S1</b> Crystallographic parameters | ... S5 |

## Supporting Figures and Tables

|                                                                                                                            |             |
|----------------------------------------------------------------------------------------------------------------------------|-------------|
| • <b>Figure S1.</b> Calculation of the cavity size of <b>1</b>                                                             | ... S6      |
| • <b>Figure S2.</b> TG analysis of as produced <b>1</b>                                                                    | ... S6      |
| • <b>Figure S3.</b> <sup>1</sup> H NMR spectra of (guest) <sub>c</sub> <b>1</b> in DMSO- <i>d</i> <sub>6</sub>             | ... S7      |
| • <b>Figure S4.</b> <sup>1</sup> H NMR spectra of (guest) <sub>c</sub> <b>1</b> in DMSO- <i>d</i> <sub>6</sub>             | ... S8      |
| • <b>Figure S5.</b> <sup>1</sup> H NMR spectrum of (benzene) <sub>x</sub> <b>1</b> in DMSO- <i>d</i> <sub>6</sub>          | ... S9      |
| • <b>Figure S6.</b> Guest exchange experiment                                                                              | ... S9      |
| • <b>Figure S7.</b> Energy minimized structures of the host-guest complexes                                                | ... S10     |
| • <b>Figure S8.</b> Decontamination of dichloromethane and chloroform saturated D <sub>2</sub> O                           | ... S11     |
| • <b>Figure S9.</b> Extraction of pyrene from (pyrene) <sub>c</sub> <b>1</b>                                               | ... S11     |
| • <b>Figure S10.</b> Extraction of benz[ <i>a</i> ]anthracene from (benz[ <i>a</i> ]anthracene) <sub>c</sub> <b>1</b>      | ... S12     |
| • <b>Figure S11.</b> SEM images of the apohost and (pyrene) <sub>c</sub> <b>1</b>                                          | ... S12     |
| • <b>Figure S12.</b> Digital images of a mixture of octane and dodecane on the surface of D <sub>2</sub> O                 | ... S13     |
| • <b>Figure S13.</b> <sup>1</sup> H NMR spectrum of the solid absorbing octane and dodecane in DMSO- <i>d</i> <sub>6</sub> | ... S13     |
| • <b>Figure S14.</b> Decontamination of benzene saturated D <sub>2</sub> O                                                 | ... S13     |
| • <b>Figure S15.</b> TG analysis of as produced (naphthalene) <sub>c</sub> <b>1</b>                                        | ... S14     |
| • <b>Figure S16.</b> TG analysis of as produced (octane) <sub>c</sub> <b>1</b>                                             | ... S14     |
| • <b>Figure S17.</b> Time course of the absorption of the chemicals in the apohost                                         | ... S15     |
| • <b>Table S2.</b> Cartesian coordinates of (naphthalene) <sub>c</sub> <b>1</b>                                            | ... S16-S21 |
| • <b>Table S3.</b> Cartesian coordinates of (anthracene) <sub>c</sub> <b>1</b>                                             | ... S22-S27 |
| • <b>Table S4.</b> Cartesian coordinates of (phenanthrene) <sub>c</sub> <b>1</b>                                           | ... S28-S33 |
| • <b>Table S5.</b> Cartesian coordinates of (pyrene) <sub>c</sub> <b>1</b>                                                 | ... S34-S39 |
| • <b>Table S6.</b> Cartesian coordinates of (benz[ <i>a</i> ]anthracene) <sub>c</sub> <b>1</b>                             | ... S40-S45 |
| • <b>Table S7.</b> Cartesian coordinates of (biphenyl) <sub>c</sub> <b>1</b>                                               | ... S46-S51 |

|                     |                                                            |             |
|---------------------|------------------------------------------------------------|-------------|
| • <b>Table S8.</b>  | Cartesian coordinates of (diphenylacetylene) <sub>C1</sub> | ... S52-S57 |
| • <b>Table S9.</b>  | Cartesian coordinates of (octane) <sub>C1</sub>            | ... S58-S63 |
| • <b>Table S10.</b> | Cartesian coordinates of (decane) <sub>C1</sub>            | ... S64-S69 |
| • <b>Table S11.</b> | Cartesian coordinates of (dodecane) <sub>C1</sub>          | ... S70-S75 |

## References

|             |         |
|-------------|---------|
| • Reference | ... S76 |
|-------------|---------|

# Experimental Section

## General

All chemicals and solvents were purchased from Kanto Chemical Co., Ltd., Wako Pure Chemical Co., Ltd., Tokyo Kasei Kogyo Co., Ltd., and Sigma-Aldrich Co., Ltd., and were used as received without further purification.  $^1\text{H}$  NMR spectra were recorded on VARIAN 300 MHz spectrometers. Chemical shifts are quoted as parts per million (ppm) relative to DMSO ( $\delta = 2.48$  ppm),  $\text{D}_2\text{O}$  ( $\delta = 4.79$  ppm), and chloroform ( $\delta = 7.26$  ppm). Thermogravimetric analysis was carried out on a SEIKO Instrument EXSTAR6200 TG/DTA system. Scanning electron microscope image of the apohost and (pyrene) $\subset$ **1** were obtained on JEOL-S5200.

Trisresorcinarenes **1** and **2** were synthesized by the procedures reported previously.<sup>[1]</sup>  $^1\text{H}$  and  $^{13}\text{C}$ -NMR spectra can be found in the previous paper.

## Computational methods

The energy minimizations of the host-guest complexes were carried out by the *MacroModel* Ver. 9.0 program using MMFFs force field.<sup>[2]</sup> The cartesian coordinates of the host-guest complexes were listed in Tables S2–S10.

## Experimental Procedure of the Absorption

Typical procedure of the absorption experiment: 0.1 mol  $\text{L}^{-1}$  of the chemical was dissolved in 2 mL of acetone. 10 mg of the apohost was added to it. The solution was standing for 24 h at room temperature. The filtration of the mixture offered the solid host-guest complex. The solid was dissolved in  $\text{DMSO-}d_6$  and subjected to be NMR analysis. The integration of the signals of **1** and the chemical provided the host-to-guest ratio.

## X-ray Crystallography

Powder X-ray diffraction was collected on a Rigaku ULTIMA III diffractometer using  $\text{Cu K}\alpha$  radiation ( $\lambda = 1.5418$  Å) at 298 K.

X-ray crystallographic data of (hexane) $\subset$ **2** were collected on a Bruker SMART AEPX II ULTRA CCD diffractometer using graphite-monochromatized  $\text{Mo K}\alpha$  radiation ( $\lambda = 0.71073$  Å) at 93 K. The crystal structure was solved by the direct method using the *SHELXS-2014* program and refined by successive differential Fourier syntheses and full-matrix least-squares procedures using the *SHELXL-2018* program.<sup>[3]</sup> Anisotropic thermal factors were applied to all non-hydrogen atoms except for some carbon atoms (C57, C230-C233, and C601-C606). The hydrogen atoms were generated geometrically. Electron densities arising from the disordered solvents and protecting groups were treated by the *SQUEEZE* routine on the *PLATON* program.<sup>[4]</sup> Crystallographic parameters are listed in Table S1.

**Table S1.** Crystallographic parameters of (hexane)<sub>2</sub>. [a]

| Parameters                                        | (hexane) <sub>2</sub>                             |
|---------------------------------------------------|---------------------------------------------------|
| Formula                                           | C <sub>279</sub> H <sub>381</sub> O <sub>48</sub> |
| Formula weight                                    | 4502.82                                           |
| Crystal system                                    | Monoclinic                                        |
| Space group                                       | <i>P</i> 2 <sub>1</sub> / <i>c</i> (#14)          |
| <i>a</i> / Å                                      | 21.609(5)                                         |
| <i>b</i> / Å                                      | 49.509(12)                                        |
| <i>c</i> / Å                                      | 28.125(7)                                         |
| $\alpha$ / °                                      | 90                                                |
| $\beta$ / °                                       | 111.398(3)                                        |
| $\gamma$ / °                                      | 90                                                |
| <i>V</i> / Å <sup>3</sup>                         | 28015(12)                                         |
| <i>d</i> <sub>calc.</sub> / g cm <sup>-3</sup>    | 1.068                                             |
| <i>Z</i>                                          | 4                                                 |
| 2 $\theta$ <sub>max</sub> / °                     | 50.314                                            |
| $\rho$ (MoK $\alpha$ ) / mm <sup>-1</sup>         | 0.071                                             |
| Temperature / K                                   | -170                                              |
| Crystal form                                      | Block                                             |
| Crystal size / mm <sup>3</sup>                    | 0.15 × 0.10 × 0.04                                |
| Crystal color                                     | Colorless                                         |
| # of total reflections                            | 268149                                            |
| # of unique reflections                           | 49871                                             |
| # of observed reflections                         | 19026                                             |
| <i>R</i> <sub>int</sub>                           | 0.150                                             |
| Criterion for observed reflections                | 2 $\sigma$                                        |
| <i>R</i> 1( <i>F</i> <sub>o</sub> )               | 0.1611                                            |
| <i>wR</i> 2( <i>F</i> <sub>o</sub> <sup>2</sup> ) | 0.3963                                            |
| <i>G. O. F.</i>                                   | 1.185                                             |
| # of parameters used                              | 2760                                              |
| $\Delta\rho$ <sub>max</sub> (eÅ <sup>-3</sup> )   | +1.246                                            |
| $\Delta\rho$ <sub>min</sub> (eÅ <sup>-3</sup> )   | -0.437                                            |
| CCDC number                                       | 2014628                                           |

[a] Formula, formula weight, and density are known contents only.

## Supporting Figures and Tables

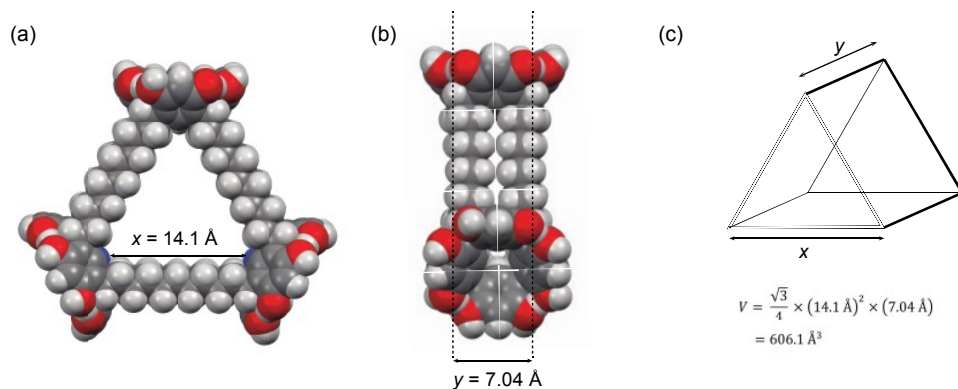

**Figure S1.** Calculation of the cavity volume of **1**.

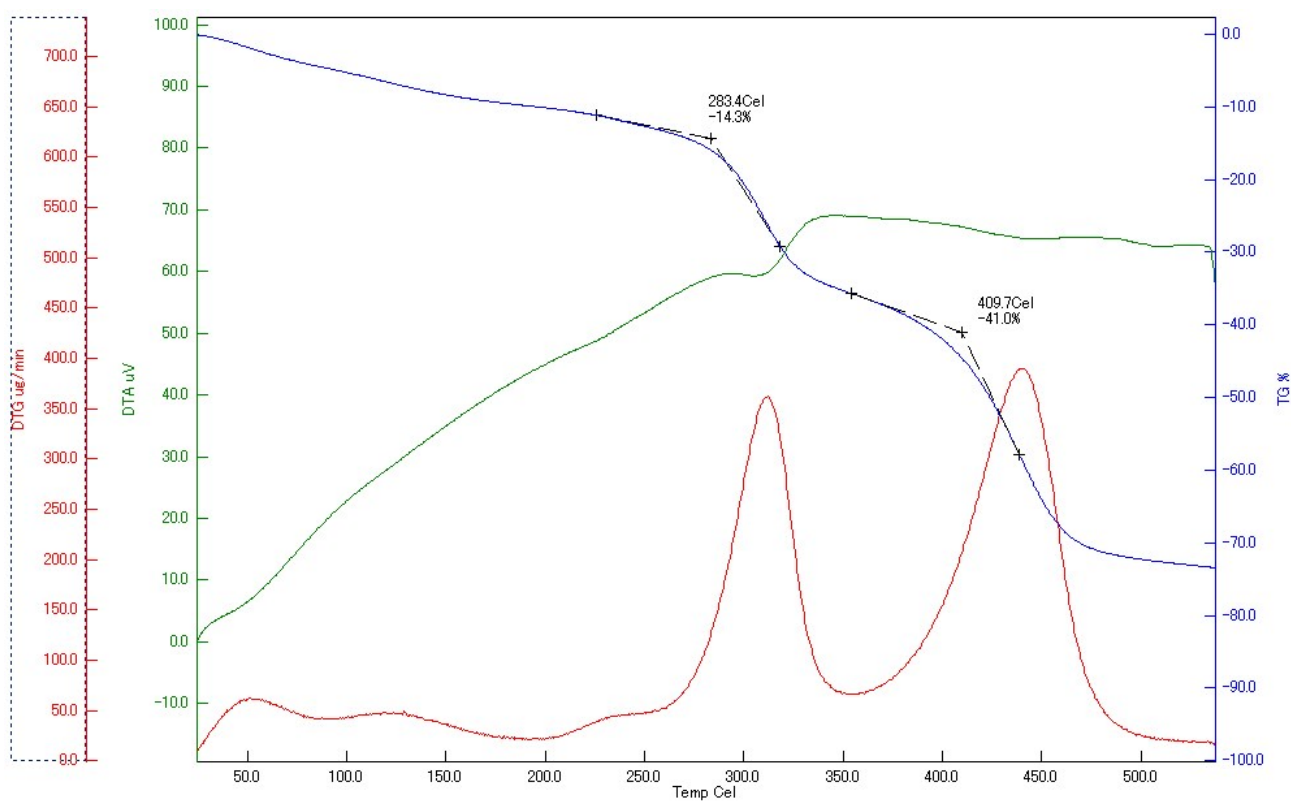

**Figure S2.** TG analysis of as produced **1**. 12.88 mg of **1** was used for the analysis. Conditions: N<sub>2</sub> atmosphere, 5 °C min<sup>-1</sup>.

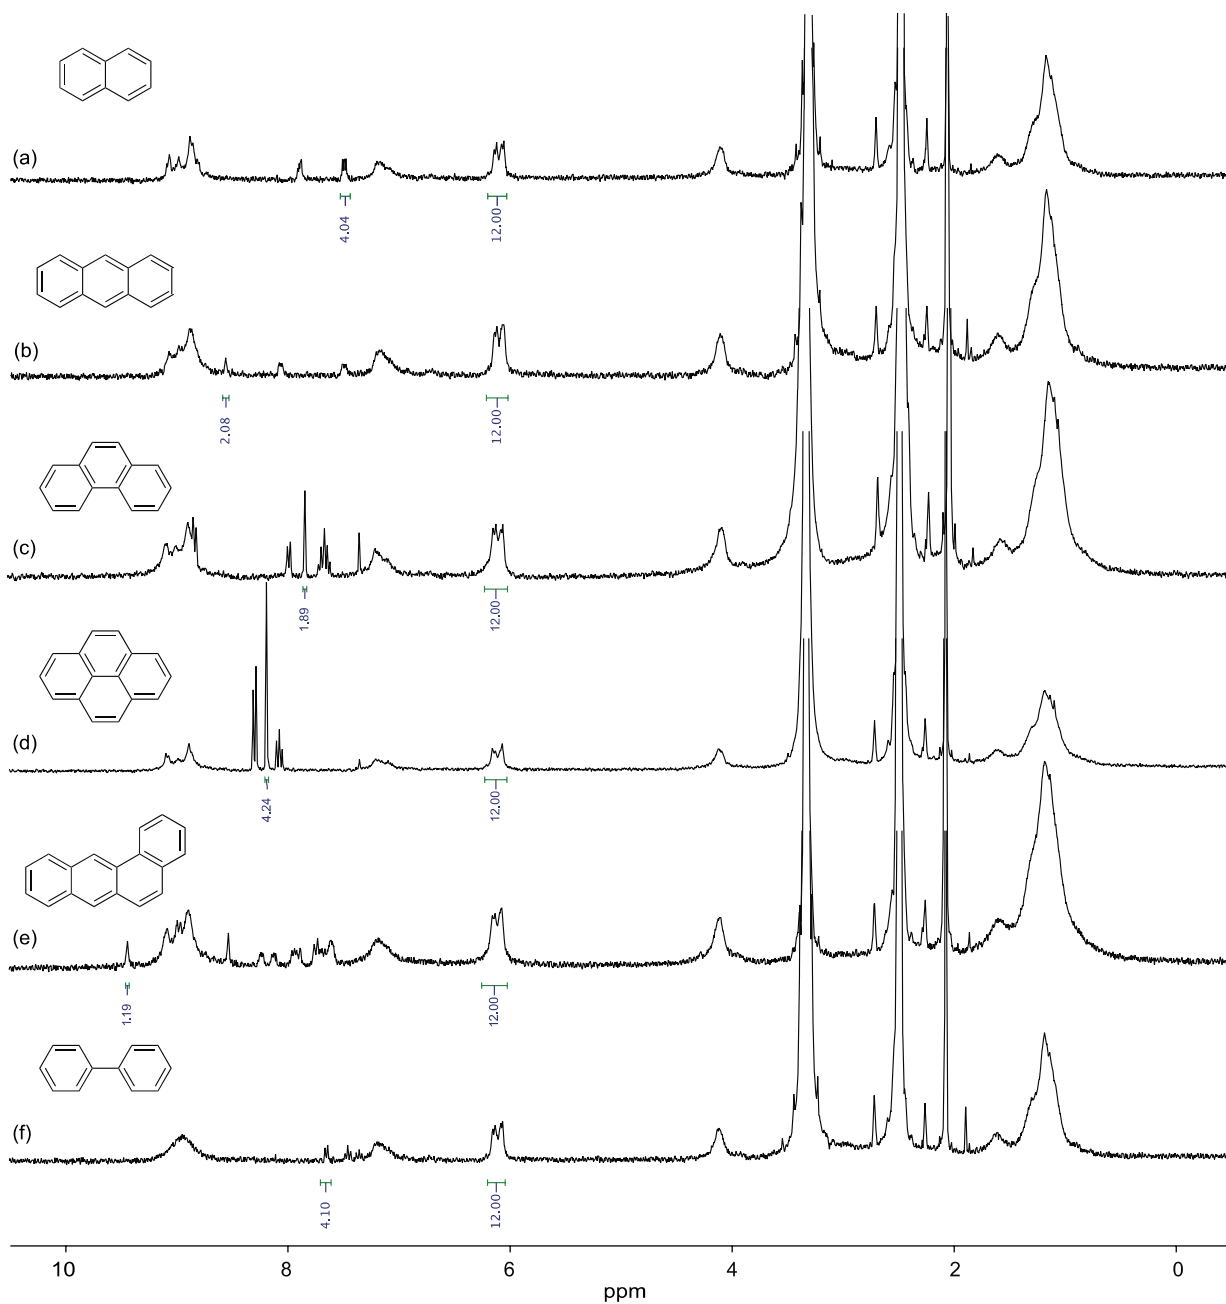

**Figure S3.**  $^1\text{H}$  NMR spectra (300 MHz,  $\text{DMSO-}d_6$ , 298 K) of (a) (naphthalene)**1**, (b) (anthracene)**1**, (c) (phenanthrene)**1**, (d) (pyrene)**1**, (e) (benz[*a*]anthracene)**1**, and (f) (biphenyl)**1**.

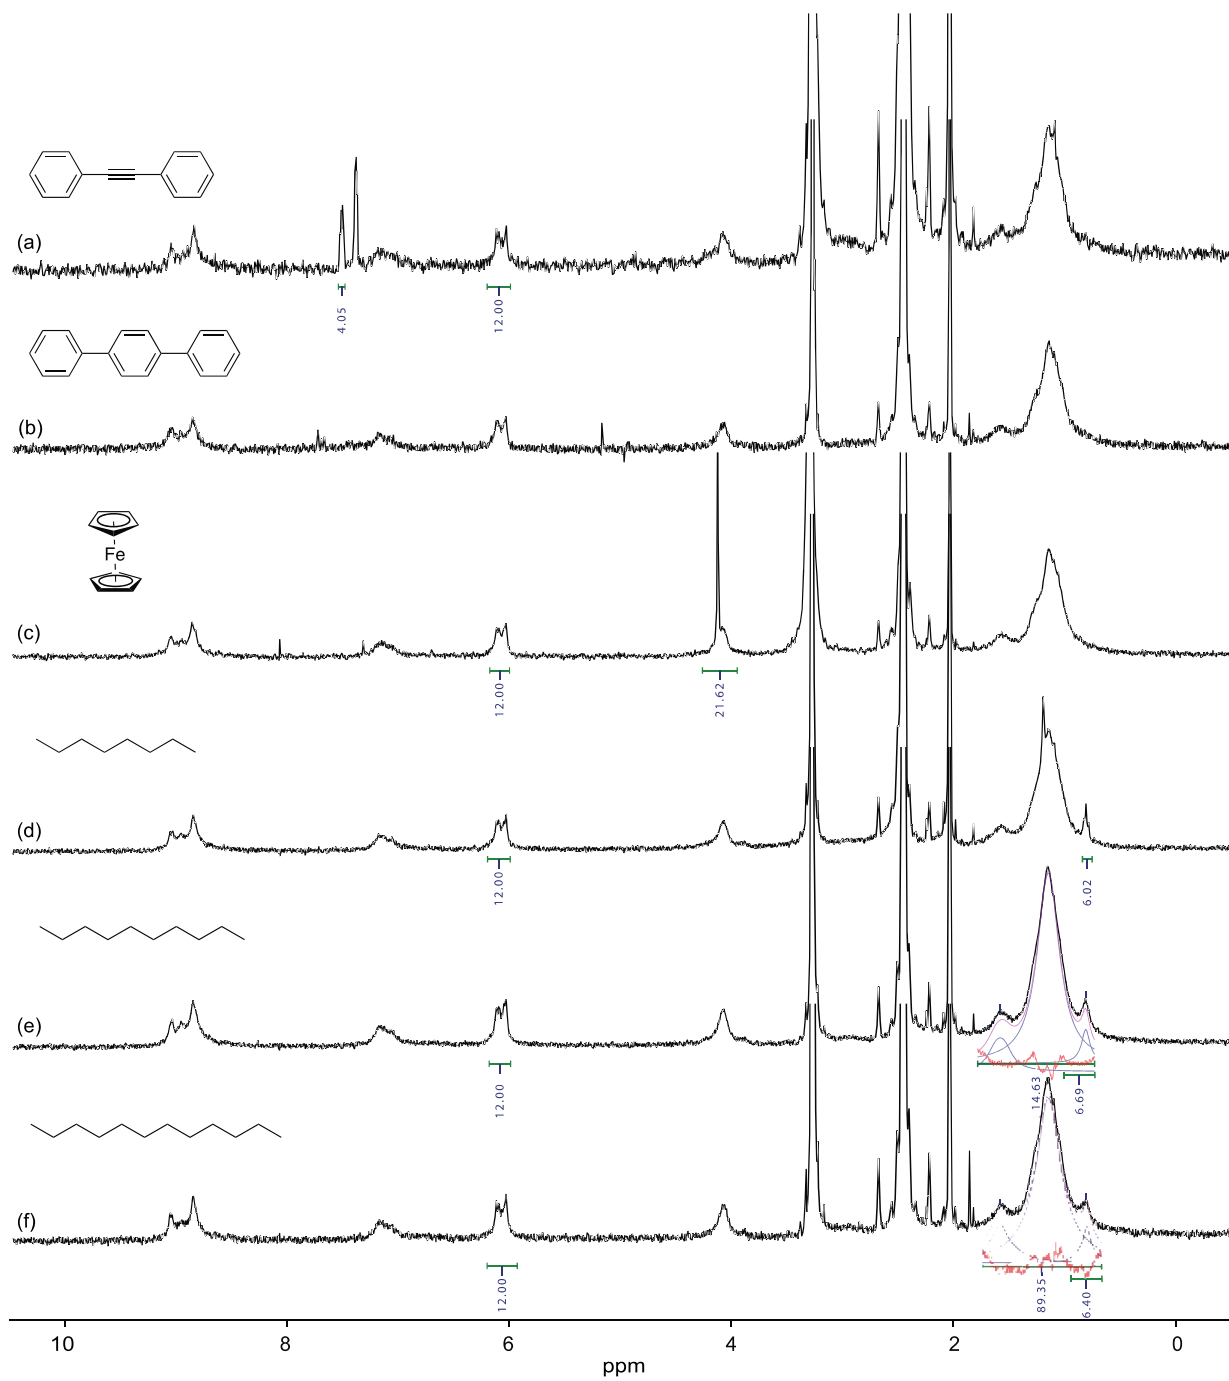

**Figure S4.**  $^1\text{H}$  NMR spectra (300 MHz,  $\text{DMSO-}d_6$ , 298 K) of (a) (diphenylacetylene)**1**, (b) (*p*-terphenyl)**1**, (c) (ferrocene)**1**, (d) (octane)**1**, (e) (decane)**1**, and (f) (dodecane)**1**.



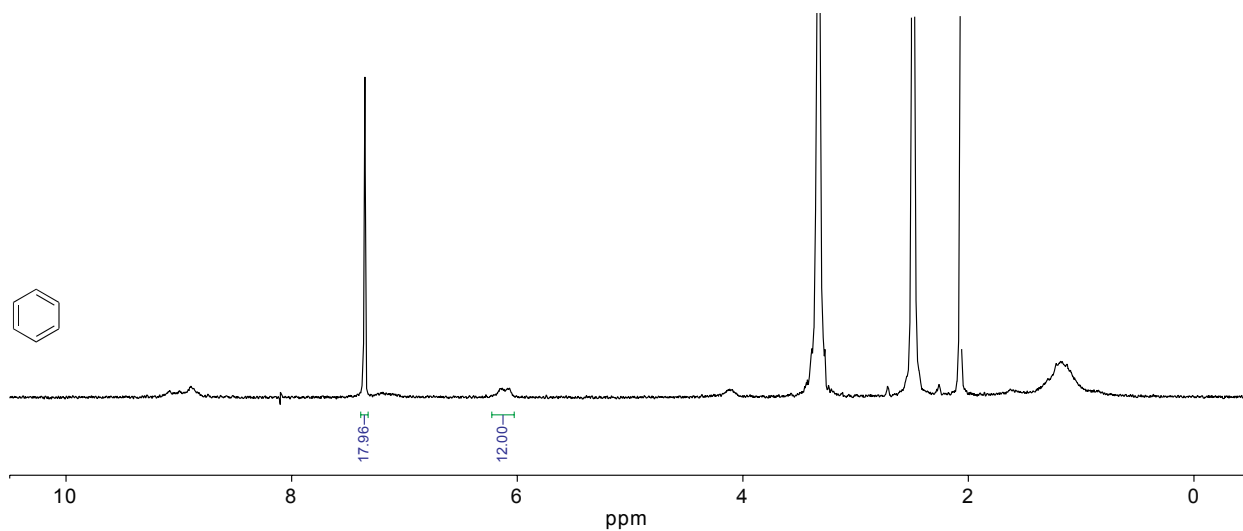

**Figure S5.**  $^1\text{H}$  NMR spectrum (300 MHz,  $\text{DMSO-}d_6$ , 298 K) of  $(\text{benzene})_x\mathbf{1}$ .

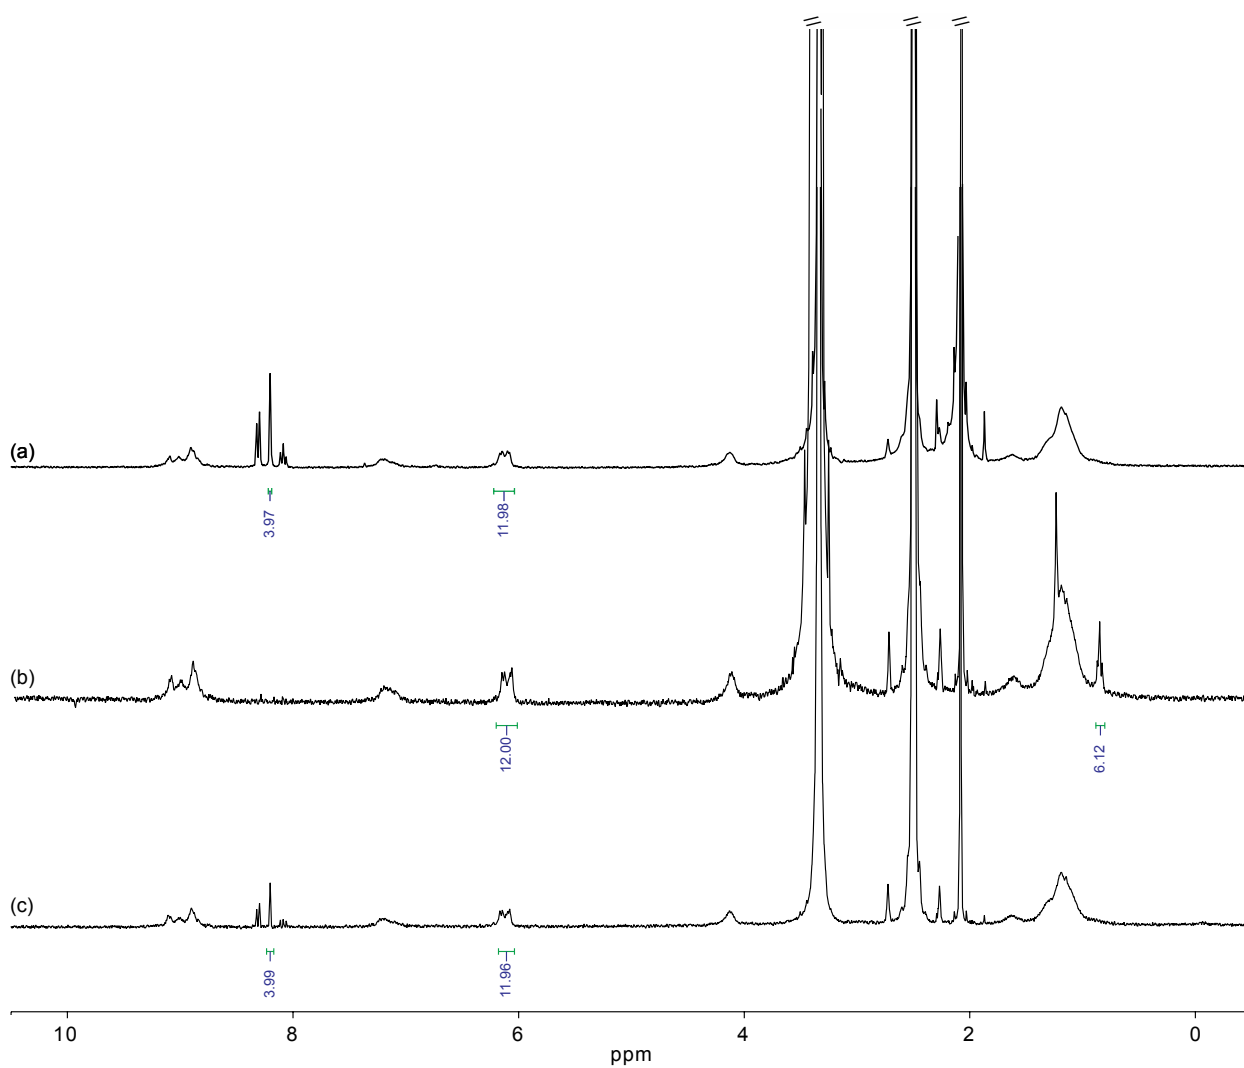

**Figure S6.** (a)–(c)  $^1\text{H}$  NMR spectra (300 MHz,  $\text{DMSO-}d_6$ , 298 K). (a)  $(\text{pyrene})_x\mathbf{1}$ , (b)  $(\text{pyrene})_x\mathbf{1}$  after contacting with octane for 5 min, and (c) the solid of (b) after contacting with pyrene for 5 min.

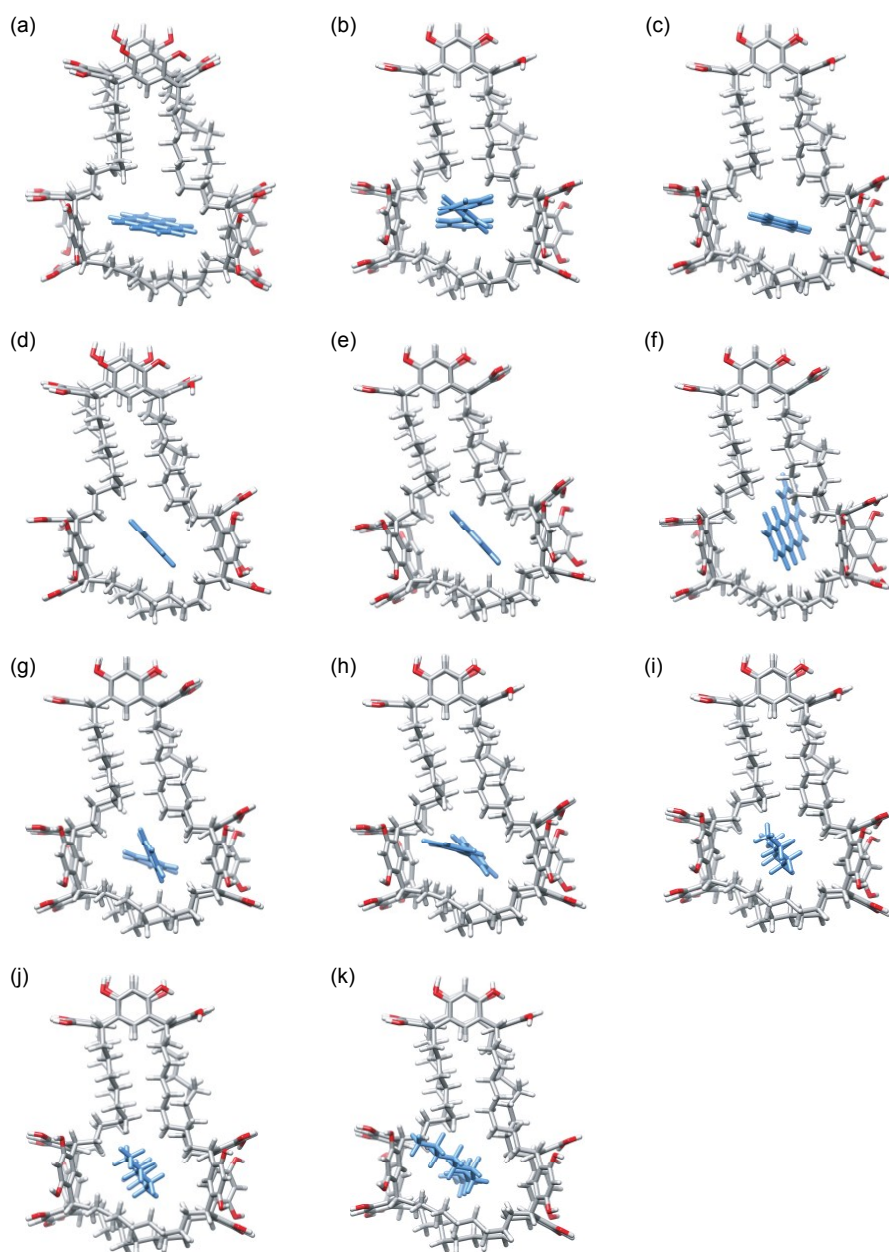

**Figure S7.** Energy minimized structures of (a) (pyrene) $\subset$ **1**, (b) (*p*-terphenyl) $\subset$ **1**, (c) (naphthalene) $\subset$ **1**, (d) (anthracene) $\subset$ **1**, (e) (phenanthrene) $\subset$ **1**, (f) (benz[*a*]anthracene) $\subset$ **1**, (g) (biphenyl) $\subset$ **1**, (h) (diphenylacetylene) $\subset$ **1**, (i) (octane) $\subset$ **1**, (j) (decane) $\subset$ **1**, and (k) (dodecane) $\subset$ **1** by MacroModel Ver. 9.0 using the MMFFs force field. MMFFs force field cannot be applied to (ferrocene) $\subset$ **1**. Color scheme: gray (carbon), white (hydrogen), red (oxygen). The guests are drawn with blue for clarity.

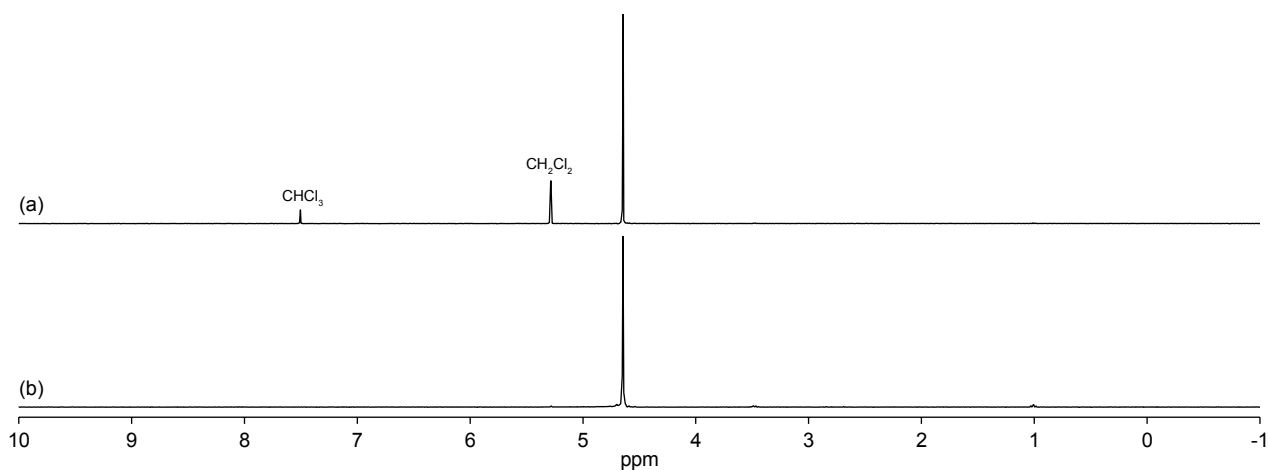

**Figure S8.** Decontamination of dichloromethane and chloroform saturated  $D_2O$  with the apohost.  $^1H$  NMR spectra (300 MHz,  $D_2O$ , 298 K) of (a) The polluted  $D_2O$  solution and (b) the  $D_2O$  solution after addition of the apohost followed by stirring for 1 h at room temperature.

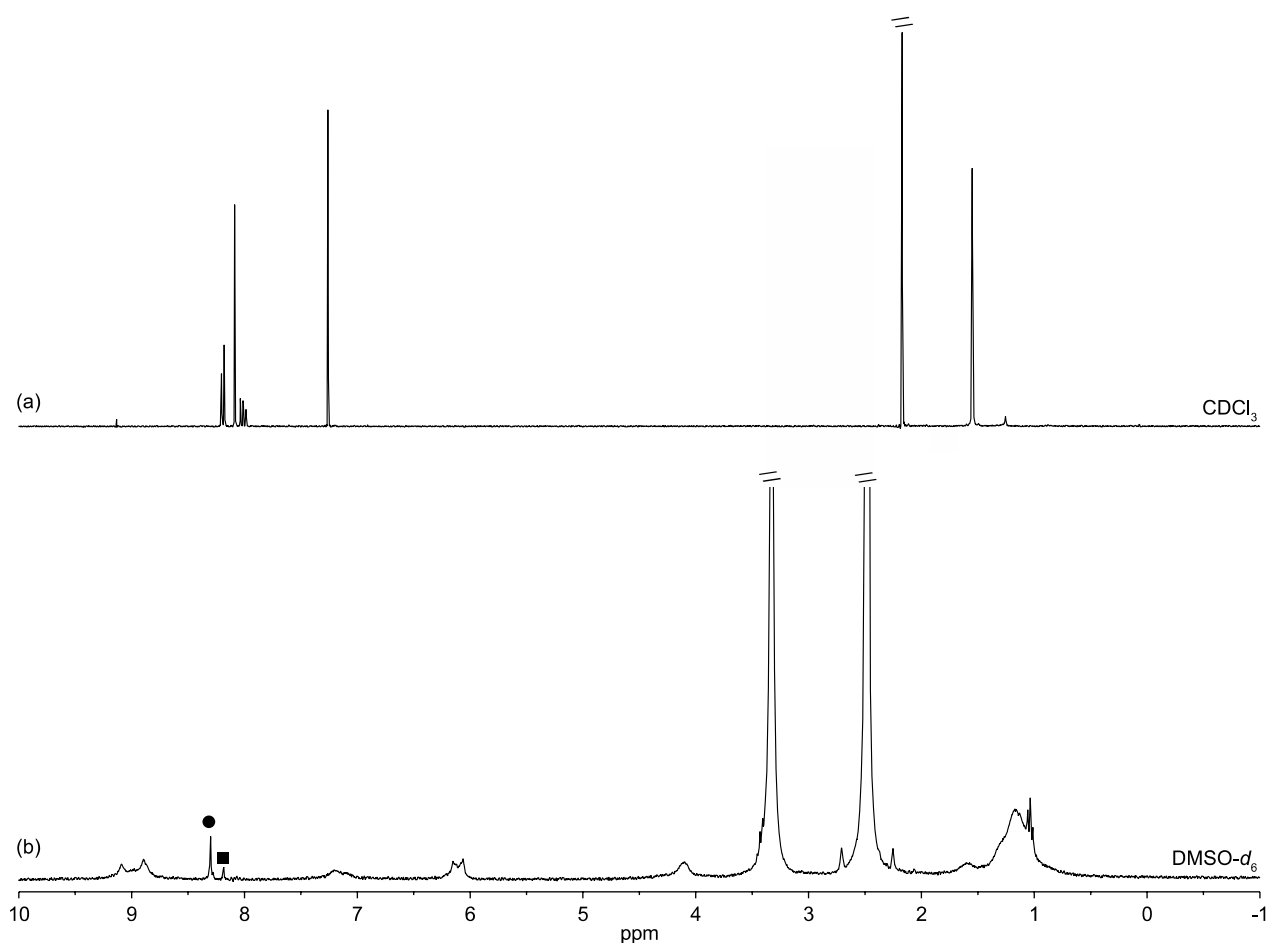

**Figure S9.** Extraction of pyrene from (pyrene) $\subset$ 1.  $^1H$  NMR spectrum (300 MHz, 298 K) of (a) a filtrate (chloroform- $d_1$ ) and (b) the residual solid dissolved in  $DMSO-d_6$ . A filled circle and a filled square denote chloroform and pyrene, respectively.

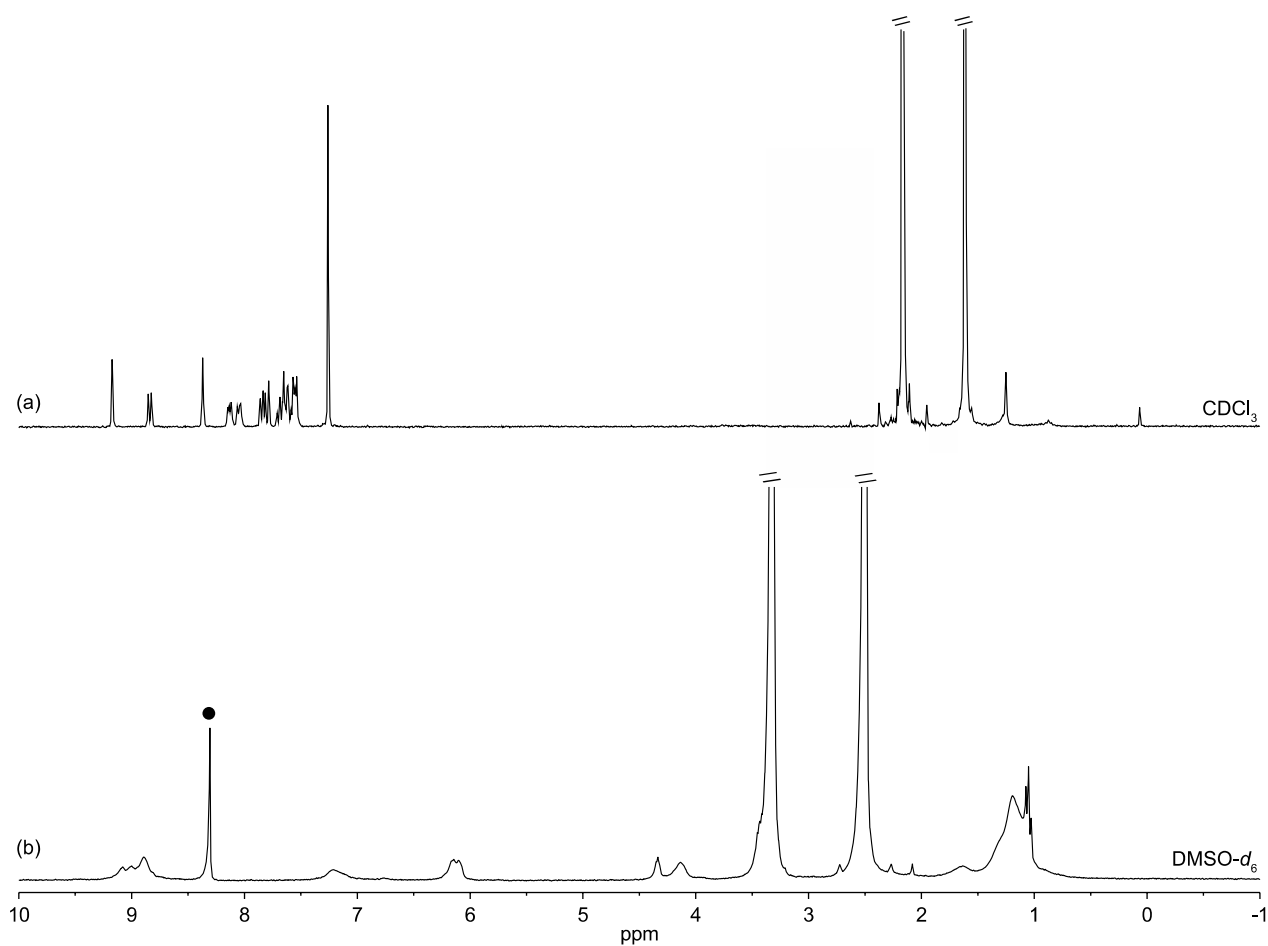

**Figure S10.** Extraction of pyrene from (benz[*a*]anthracene) $\subset$ 1.  $^1\text{H}$  NMR spectrum (300 MHz, 298 K) of (a) a filtrate (chloroform- $d_1$ ) and (b) the residual solid dissolved in DMSO- $d_6$ . A filled circle denotes chloroform.

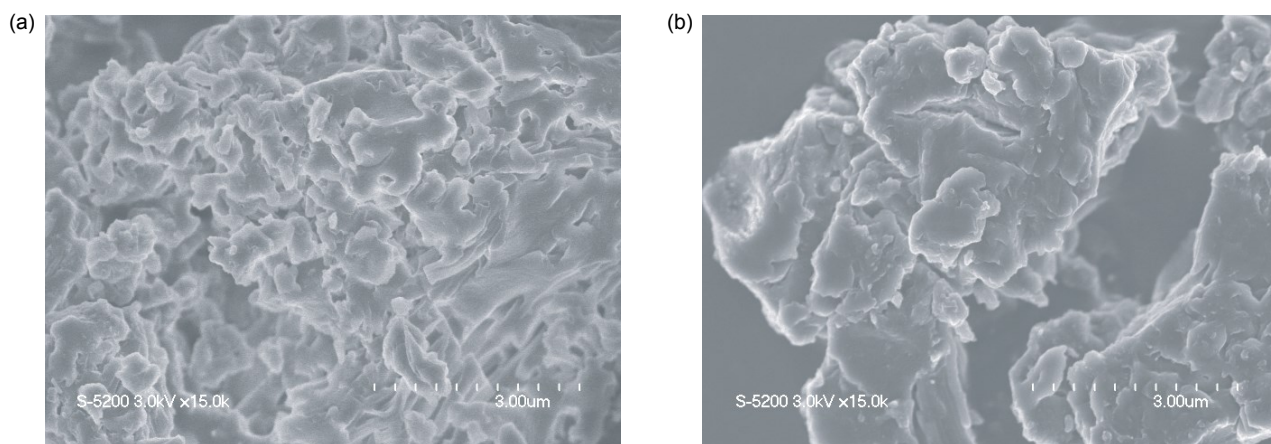

**Figure S11.** SEM images of (a) the apohost and (b) (pyrene) $\subset$ 1.

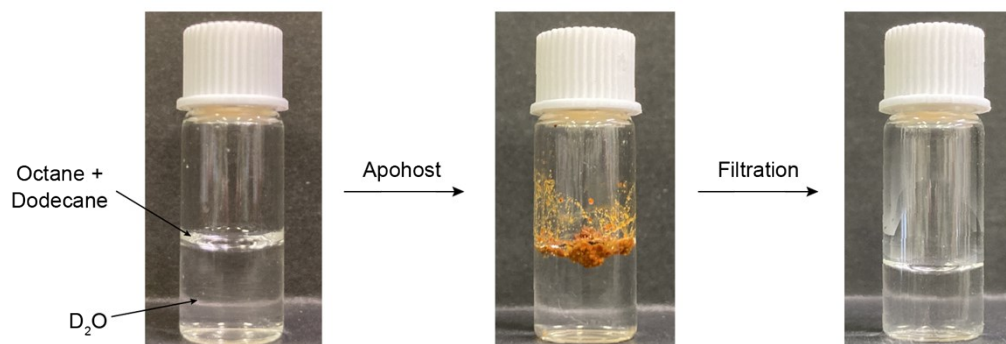

**Figure S12.** Digital images of the removal of a mixture of octane and dodecane on the surface of  $D_2O$  with the apohost.

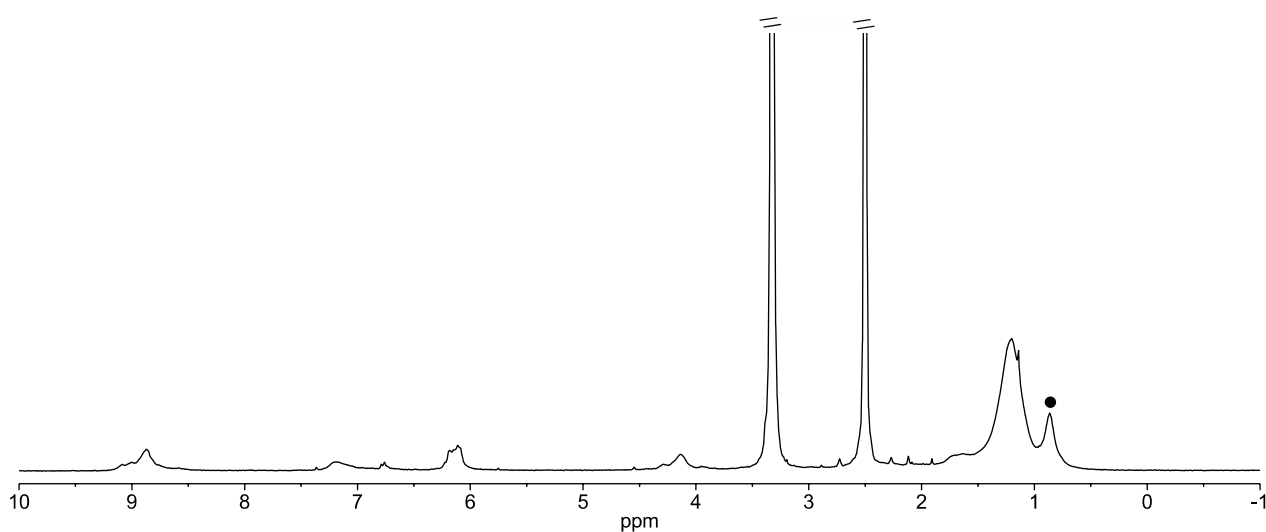

**Figure S13.**  $^1H$  NMR spectrum (300 MHz,  $DMSO-d_6$ , 298 K) of the solid that absorbed the mixture of octane and dodecane dissolved in  $DMSO-d_6$ . A filled circle denotes the signals of octane and dodecane.

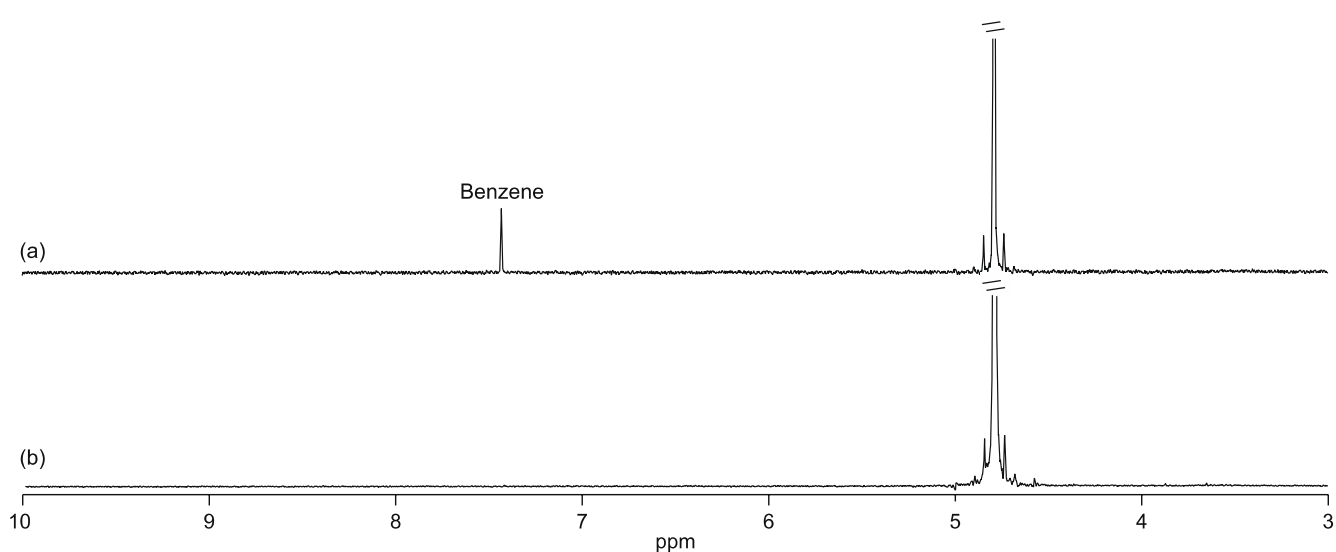

**Figure S14.** Decontamination of benzene saturated  $D_2O$  with the apohost.  $^1H$  NMR spectra (300 MHz,  $D_2O$ , 298 K) of (a) The polluted  $D_2O$  solution and (b) the  $D_2O$  solution after addition of the apohost followed by stirring for 1 h at room temperature.

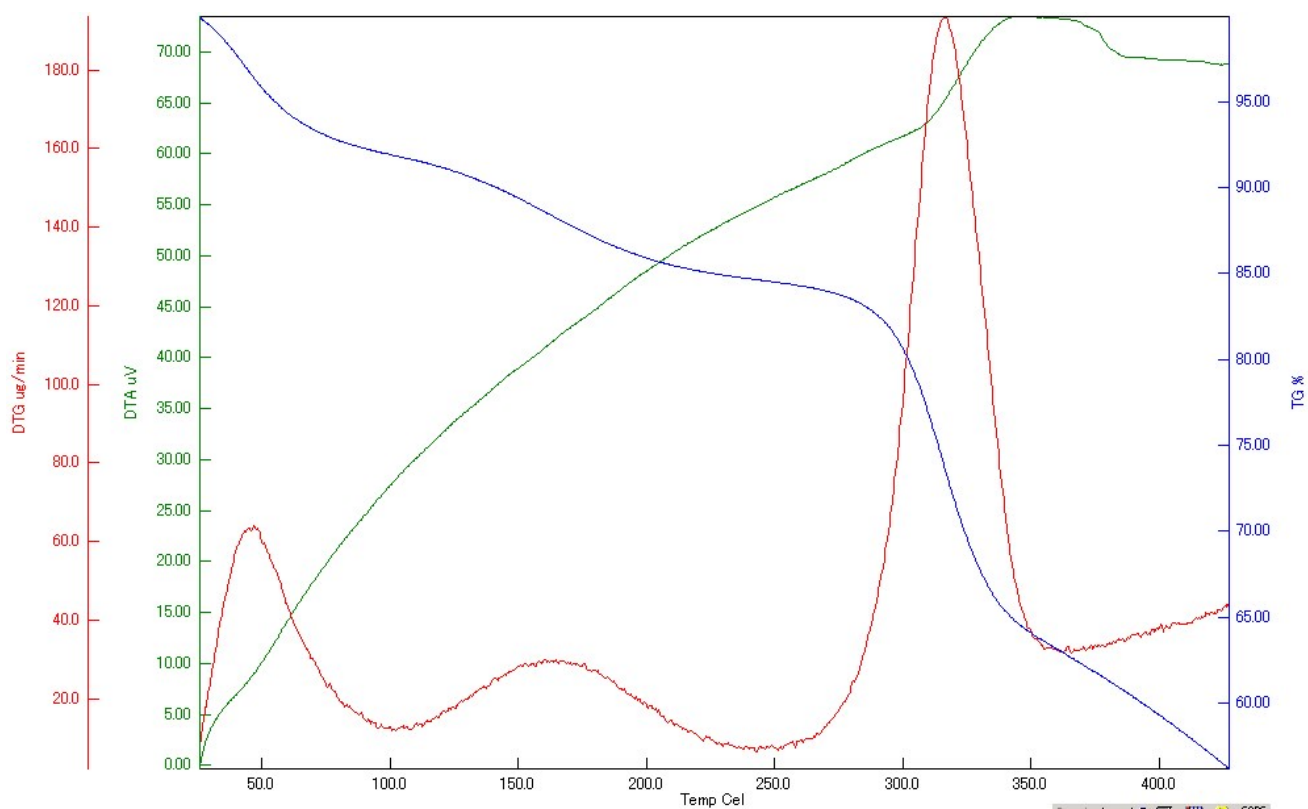

**Figure S15.** TG analysis of (naphthalene)**C1**. 3.308 mg of (naphthalene)**C1** was used for the analysis. Conditions: N<sub>2</sub> atmosphere, 10 °C min<sup>-1</sup>. The weight loss at low temperature (<60 °C) is caused by evaporation of acetone.

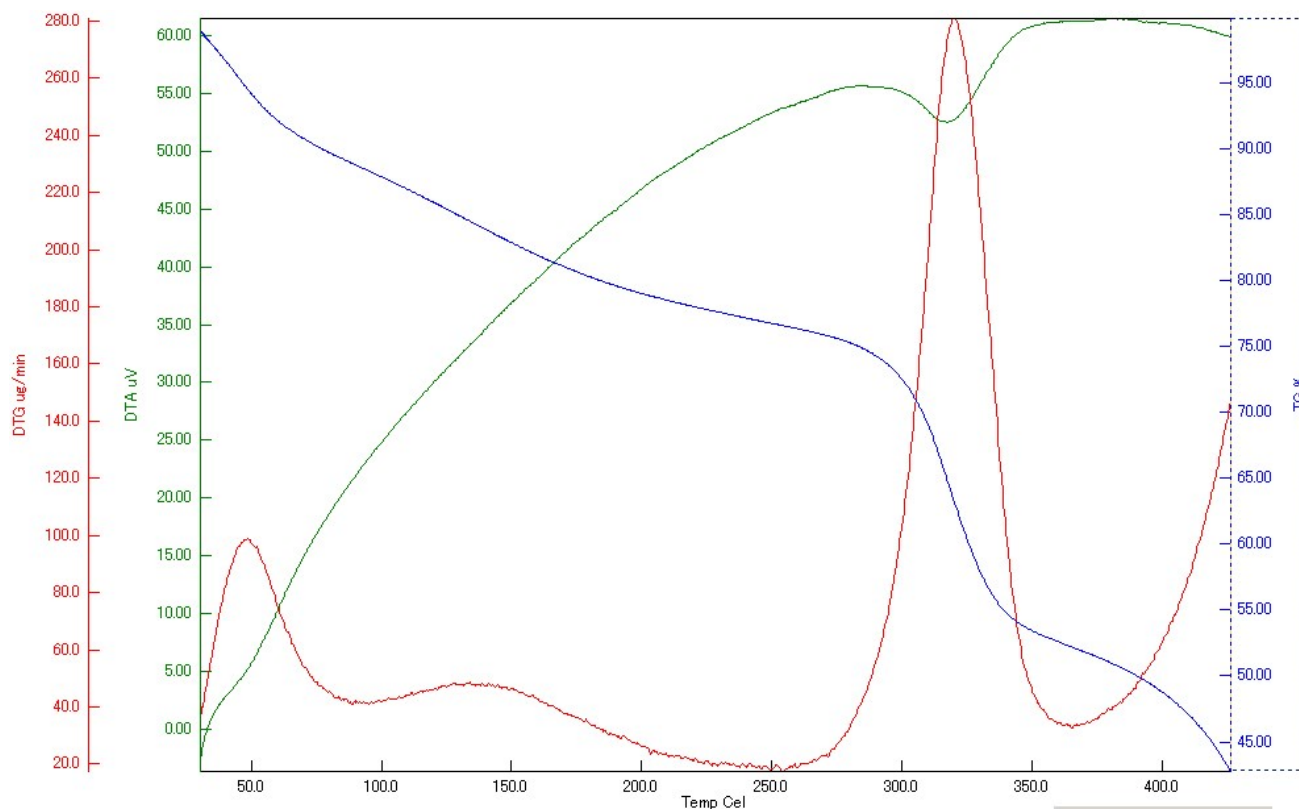

**Figure S16.** TG analysis of (octane)**C1**. 4.095 mg of (octane)**C1** was used for the analysis. Conditions: N<sub>2</sub> atmosphere, 10 °C min<sup>-1</sup>. The weight loss at low temperature (<60 °C) is caused by evaporation of acetone.

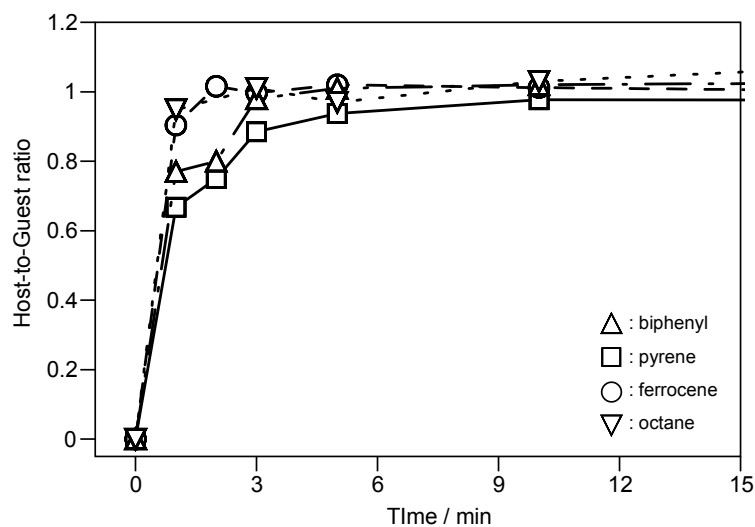

**Figure S17.** Change of the relative ratio of **1** and the guest (biphenyl = triangle, pyrene = square, ferrocene = circle, octane = inverted triangle).

The absorption processes of four structurally distinct chemicals, namely, biphenyl, pyrene, ferrocene, and octane, were investigated by  $^1\text{H}$  NMR spectroscopy. The apohost (10 mg) immersed in the acetone solution containing the chemical ( $0.1 \text{ mol L}^{-1}$ ) was collected and dissolved in  $\text{DMSO-}d_6$ . The amount of the absorbed chemical relative to that of **1** was plotted as a function of time (Figure S17). The guests were found to be quickly absorbed in the apohost under the given conditions irrespective of their structures to form the host-guest complexes with the 1:1 host-to-guest ratio. For example, the apohost was saturated with octane within a minute. The other chemicals were absorbed at similar rates. However, pyrene was absorbed slowly compared to the other compounds. The apohost was saturated by pyrene within 5 min.

**Table S2.** Cartesian coordinates of the structure of (naphthalene)<sub>c</sub>1 optimized by MacroModel Ver 9.1 using the MMFFs force field.

| Center Number | Atomic Number | Coordinates (Angstroms) |        |        |
|---------------|---------------|-------------------------|--------|--------|
|               |               | X                       | Y      | Z      |
| 1             | C1            | 10.525                  | 4.346  | 9.678  |
| 2             | C2            | 9.5                     | 4.451  | 10.631 |
| 3             | C02B          | 0.405                   | 19.479 | 13.167 |
| 4             | C3            | 9.084                   | 5.738  | 11.019 |
| 5             | C4            | 9.668                   | 6.894  | 10.47  |
| 6             | C5            | 10.685                  | 6.73   | 9.515  |
| 7             | C6            | 11.108                  | 5.47   | 9.102  |
| 8             | C18           | 6.815                   | 18.907 | 10.447 |
| 9             | C19           | 8.154                   | 19.311 | 10.352 |
| 10            | C20           | 8.906                   | 19.583 | 11.492 |
| 11            | C21           | 8.329                   | 19.427 | 12.748 |
| 12            | C22           | 6.998                   | 19.02  | 12.898 |
| 13            | C23           | 6.257                   | 18.755 | 11.73  |
| 14            | C35           | 9.69                    | 7.339  | 16.811 |
| 15            | C36           | 9.27                    | 6.105  | 16.277 |
| 16            | C37           | 9.448                   | 4.894  | 16.978 |
| 17            | C38           | 10.08                   | 4.944  | 18.229 |
| 18            | C39           | 10.527                  | 6.148  | 18.769 |
| 19            | C40           | 10.321                  | 7.333  | 18.064 |
| 20            | C41           | 10.096                  | 8.77   | 14.725 |
| 21            | C42           | 11.398                  | 9.283  | 14.637 |
| 22            | C43           | 12.026                  | 9.462  | 13.407 |
| 23            | C44           | 11.355                  | 9.132  | 12.233 |
| 24            | C45           | 10.049                  | 8.619  | 12.258 |
| 25            | C46           | 9.455                   | 8.41   | 13.522 |
| 26            | C48           | 9.61                    | 3.159  | 15.116 |
| 27            | C49           | 10.828                  | 2.462  | 15.148 |
| 28            | C50           | 11.454                  | 2.039  | 13.978 |
| 29            | C51           | 10.863                  | 2.297  | 12.744 |
| 30            | C52           | 9.639                   | 2.976  | 12.654 |
| 31            | C53           | 9.055                   | 3.438  | 13.855 |
| 32            | C64           | -1.559                  | 4.136  | 8.141  |
| 33            | C65           | -1.922                  | 5.301  | 7.226  |
| 34            | C66           | -1.597                  | 6.623  | 7.573  |
| 35            | C67           | -1.961                  | 7.708  | 6.754  |
| 36            | C68           | -2.606                  | 7.435  | 5.538  |
| 37            | C69           | -2.96                   | 6.135  | 5.183  |
| 38            | C70           | -2.643                  | 5.088  | 6.044  |
| 39            | C82           | 2.309                   | 19.928 | 9.201  |
| 40            | C83           | 3.437                   | 19.093 | 9.325  |
| 41            | C84           | 4.749                   | 19.563 | 9.123  |
| 42            | C85           | 4.908                   | 20.928 | 8.838  |
| 43            | C86           | 3.816                   | 21.793 | 8.762  |
| 44            | C87           | 2.529                   | 21.288 | 8.941  |
| 45            | C88           | 0.256                   | 19.569 | 10.711 |
| 46            | C89           | -1.109                  | 19.872 | 10.836 |
| 47            | C91           | -0.964                  | 19.776 | 13.236 |
| 48            | C93           | 0.996                   | 19.371 | 11.892 |
| 49            | C95           | 2.607                   | 19.874 | 14.444 |
| 50            | C96           | 2.733                   | 21.268 | 14.56  |
| 51            | C97           | 3.981                   | 21.884 | 14.586 |
| 52            | C98           | 5.136                   | 21.112 | 14.491 |
| 53            | C99           | 5.073                   | 19.712 | 14.383 |
| 54            | C100          | 3.793                   | 19.121 | 14.352 |
| 55            | C111          | -2.548                  | 9.798  | 10.949 |
| 56            | C112          | -1.856                  | 9.442  | 9.773  |



|     |      |        |        |        |
|-----|------|--------|--------|--------|
| 57  | C113 | -2.472 | 9.468  | 8.505  |
| 58  | C114 | -3.837 | 9.792  | 8.451  |
| 59  | C115 | -4.561 | 10.101 | 9.6    |
| 60  | C116 | -3.912 | 10.11  | 10.833 |
| 61  | C117 | -2.201 | 8.691  | 13.229 |
| 62  | C118 | -1.988 | 7.362  | 12.81  |
| 63  | C119 | -2.29  | 6.266  | 13.643 |
| 64  | C120 | -2.804 | 6.535  | 14.922 |
| 65  | C121 | -3.007 | 7.84   | 15.367 |
| 66  | C122 | -2.696 | 8.905  | 14.524 |
| 67  | C124 | -2.659 | 4.488  | 11.836 |
| 68  | C125 | -3.997 | 4.086  | 11.739 |
| 69  | C126 | -4.552 | 3.71   | 10.516 |
| 70  | C127 | -3.771 | 3.726  | 9.361  |
| 71  | C128 | -2.43  | 4.137  | 9.399  |
| 72  | C129 | -1.909 | 4.542  | 10.647 |
| 73  | C1   | 6.262  | 17.356 | 14.6   |
| 74  | C2   | 5.884  | 17.05  | 16.056 |
| 75  | C3   | 6.296  | 15.64  | 16.494 |
| 76  | C4   | 5.688  | 14.517 | 15.649 |
| 77  | C5   | 6.167  | 13.147 | 16.137 |
| 78  | C6   | 5.633  | 12.019 | 15.251 |
| 79  | C7   | 6.025  | 10.62  | 15.735 |
| 80  | C8   | 7.534  | 10.372 | 15.705 |
| 81  | C9   | 7.872  | 8.923  | 16.08  |
| 82  | C10  | 5.972  | 18.634 | 9.201  |
| 83  | C11  | 0.689  | 17.909 | 8.876  |
| 84  | C12  | 0.881  | 19.385 | 9.325  |
| 85  | C13  | 1.033  | 17.679 | 7.396  |
| 86  | C14  | 0.692  | 16.267 | 6.909  |
| 87  | C15  | 1.545  | 15.175 | 7.559  |
| 88  | C16  | 1.179  | 13.795 | 7.005  |
| 89  | C17  | 1.592  | 11.27  | 7.252  |
| 90  | C18  | 1.944  | 12.684 | 7.729  |
| 91  | C19  | 0.101  | 10.949 | 7.383  |
| 92  | C20  | -0.187 | 9.452  | 7.209  |
| 93  | C21  | -1.708 | 9.145  | 7.212  |
| 94  | C22  | -1.866 | 9.877  | 12.32  |
| 95  | C23  | -0.332 | 10.099 | 12.326 |
| 96  | C24  | 0.086  | 11.452 | 11.737 |
| 97  | C25  | 1.604  | 11.648 | 11.713 |
| 98  | C26  | 2.281  | 11.728 | 13.084 |
| 99  | C27  | 1.739  | 12.811 | 14.023 |
| 100 | C28  | 1.802  | 14.218 | 13.425 |
| 101 | C29  | 1.43   | 15.279 | 14.461 |
| 102 | C30  | 1.375  | 16.673 | 13.83  |
| 103 | C31  | 1.129  | 17.748 | 14.9   |
| 104 | C32  | 1.213  | 19.231 | 14.441 |
| 105 | C33  | -0.526 | 4.444  | 13.303 |
| 106 | C34  | -0.024 | 4.063  | 8.37   |
| 107 | C35  | 0.393  | 2.725  | 8.999  |
| 108 | C36  | 1.668  | 2.846  | 9.834  |
| 109 | C37  | 1.335  | 3.725  | 14.901 |
| 110 | C38  | 2.91   | 2.784  | 16.699 |
| 111 | C39  | 1.943  | 1.529  | 10.561 |
| 112 | C40  | 4.28   | 3.09   | 16.084 |
| 113 | C41  | 5.309  | 2.069  | 16.584 |
| 114 | C42  | 3.018  | 1.642  | 11.637 |
| 115 | C43  | 5.443  | 1.736  | 12.218 |
| 116 | C44  | 6.897  | 1.751  | 11.757 |
| 117 | C45  | 4.429  | 1.848  | 11.081 |
| 118 | C46  | 1.815  | 3.793  | 16.355 |
| 119 | C47  | -0.006 | 4.454  | 14.748 |

|     |     |        |        |        |
|-----|-----|--------|--------|--------|
| 120 | C48 | 6.729  | 2.253  | 16.041 |
| 121 | C49 | 7.361  | 3.605  | 16.402 |
| 122 | C50 | 9.402  | 8.654  | 16.085 |
| 123 | C51 | 8.918  | 3.573  | 16.416 |
| 124 | C52 | 8.949  | 3.199  | 11.307 |
| 125 | C53 | 9.296  | 8.293  | 10.968 |
| 126 | C54 | 7.762  | 8.546  | 10.986 |
| 127 | C55 | 7.33   | 9.98   | 11.346 |
| 128 | C56 | 7.934  | 11.065 | 10.45  |
| 129 | C57 | 7.539  | 12.471 | 10.915 |
| 130 | C58 | 6.343  | 18.871 | 14.272 |
| 131 | C59 | 7.396  | 3.146  | 11.344 |
| 132 | C60 | -1.721 | 19.982 | 12.084 |
| 133 | O1  | 12.057 | 9.355  | 11.079 |
| 134 | O2  | 12.061 | 9.63   | 15.783 |
| 135 | O3  | 11.407 | 2.181  | 16.355 |
| 136 | O4  | 10.709 | 8.519  | 18.626 |
| 137 | O5  | 10.231 | 3.791  | 18.951 |
| 138 | O6  | 11.551 | 1.833  | 11.655 |
| 139 | O7  | 11.012 | 3.098  | 9.373  |
| 140 | O8  | 11.328 | 7.847  | 9.039  |
| 141 | O9  | -4.469 | 9.816  | 7.237  |
| 142 | O10 | -4.615 | 10.447 | 11.958 |
| 143 | O11 | -4.766 | 4.046  | 12.869 |
| 144 | O12 | -4.404 | 3.304  | 8.221  |
| 145 | O13 | -3.089 | 5.492  | 15.761 |
| 146 | O14 | -2.856 | 10.187 | 14.976 |
| 147 | O15 | -1.568 | 19.844 | 14.463 |
| 148 | O16 | -1.859 | 20.036 | 9.702  |
| 149 | O17 | 1.604  | 22.035 | 14.661 |
| 150 | O18 | 1.453  | 22.128 | 8.846  |
| 151 | O19 | 6.167  | 21.419 | 8.619  |
| 152 | O20 | 8.736  | 19.42  | 9.119  |
| 153 | O21 | 9.121  | 19.71  | 13.824 |
| 154 | O22 | 6.309  | 21.817 | 14.516 |
| 155 | O23 | -2.904 | 8.468  | 4.693  |
| 156 | O24 | -3.098 | 3.821  | 5.78   |
| 157 | C61 | -2.034 | 4.826  | 13.196 |
| 158 | C62 | 8.283  | 13.564 | 10.136 |
| 159 | C63 | 5.636  | 17.12  | 9.077  |
| 160 | C64 | 6.491  | 14.758 | 8.742  |
| 161 | C65 | 6.877  | 16.228 | 8.949  |
| 162 | C66 | 7.713  | 13.832 | 8.738  |
| 163 | H1  | 5.57   | 16.845 | 13.92  |
| 164 | H2  | 7.251  | 16.915 | 14.408 |
| 165 | H3  | 4.805  | 17.171 | 16.201 |
| 166 | H4  | 6.376  | 17.767 | 16.724 |
| 167 | H5  | 6.003  | 15.503 | 17.542 |
| 168 | H6  | 7.391  | 15.566 | 16.464 |
| 169 | H7  | 5.973  | 14.638 | 14.598 |
| 170 | H8  | 4.594  | 14.569 | 15.698 |
| 171 | H9  | 5.841  | 12.99  | 17.172 |
| 172 | H10 | 7.262  | 13.135 | 16.134 |
| 173 | H11 | 5.98   | 12.16  | 14.22  |
| 174 | H12 | 4.539  | 12.075 | 15.228 |
| 175 | H13 | 5.526  | 9.884  | 15.091 |
| 176 | H14 | 5.643  | 10.462 | 16.751 |
| 177 | H15 | 8.034  | 11.043 | 16.412 |
| 178 | H16 | 7.919  | 10.61  | 14.708 |
| 179 | H17 | 7.343  | 8.23   | 15.416 |
| 180 | H18 | 7.473  | 8.734  | 17.086 |
| 181 | H19 | 6.56   | 18.866 | 8.302  |
| 182 | H20 | -0.362 | 17.624 | 9.024  |

|     |     |        |        |        |
|-----|-----|--------|--------|--------|
| 183 | H21 | 1.267  | 17.236 | 9.519  |
| 184 | H22 | 0.29   | 19.977 | 8.612  |
| 185 | H23 | 2.093  | 17.873 | 7.207  |
| 186 | H24 | 0.468  | 18.394 | 6.786  |
| 187 | H25 | 0.838  | 16.234 | 5.822  |
| 188 | H26 | -0.371 | 16.066 | 7.09   |
| 189 | H27 | 1.391  | 15.175 | 8.643  |
| 190 | H28 | 2.608  | 15.376 | 7.38   |
| 191 | H29 | 1.396  | 13.753 | 5.931  |
| 192 | H30 | 0.101  | 13.648 | 7.126  |
| 193 | H31 | 2.175  | 10.556 | 7.846  |
| 194 | H32 | 1.903  | 11.145 | 6.208  |
| 195 | H33 | 3.022  | 12.84  | 7.6    |
| 196 | H34 | 1.744  | 12.753 | 8.804  |
| 197 | H35 | -0.457 | 11.508 | 6.623  |
| 198 | H36 | -0.256 | 11.289 | 8.359  |
| 199 | H37 | 0.341  | 8.877  | 7.978  |
| 200 | H38 | 0.237  | 9.13   | 6.248  |
| 201 | H39 | -2.117 | 9.827  | 6.455  |
| 202 | H40 | -2.273 | 10.789 | 12.777 |
| 203 | H41 | 0.183  | 9.29   | 11.799 |
| 204 | H42 | 0.021  | 10.053 | 13.365 |
| 205 | H43 | -0.396 | 12.264 | 12.293 |
| 206 | H44 | -0.274 | 11.539 | 10.708 |
| 207 | H45 | 1.827  | 12.564 | 11.155 |
| 208 | H46 | 2.063  | 10.83  | 11.142 |
| 209 | H47 | 3.352  | 11.905 | 12.923 |
| 210 | H48 | 2.211  | 10.757 | 13.588 |
| 211 | H49 | 2.324  | 12.785 | 14.95  |
| 212 | H50 | 0.707  | 12.576 | 14.309 |
| 213 | H51 | 1.117  | 14.292 | 12.573 |
| 214 | H52 | 2.813  | 14.416 | 13.049 |
| 215 | H53 | 2.169  | 15.266 | 15.271 |
| 216 | H54 | 0.456  | 15.042 | 14.906 |
| 217 | H55 | 0.562  | 16.69  | 13.094 |
| 218 | H56 | 2.301  | 16.861 | 13.281 |
| 219 | H57 | 1.809  | 17.594 | 15.748 |
| 220 | H58 | 0.119  | 17.574 | 15.298 |
| 221 | H59 | 0.707  | 19.768 | 15.258 |
| 222 | H60 | -0.389 | 3.435  | 12.891 |
| 223 | H61 | 0.095  | 5.119  | 12.703 |
| 224 | H62 | 0.323  | 4.905  | 8.976  |
| 225 | H63 | 0.498  | 4.161  | 7.408  |
| 226 | H64 | 0.536  | 1.982  | 8.205  |
| 227 | H65 | -0.406 | 2.336  | 9.64   |
| 228 | H66 | 1.547  | 3.648  | 10.571 |
| 229 | H67 | 2.514  | 3.113  | 9.191  |
| 230 | H68 | 1.208  | 2.678  | 14.6   |
| 231 | H69 | 2.086  | 4.165  | 14.236 |
| 232 | H70 | 3.015  | 2.768  | 17.792 |
| 233 | H71 | 2.587  | 1.778  | 16.404 |
| 234 | H72 | 2.212  | 0.751  | 9.837  |
| 235 | H73 | 1.021  | 1.193  | 11.054 |
| 236 | H74 | 4.586  | 4.103  | 16.368 |
| 237 | H75 | 4.218  | 3.056  | 14.992 |
| 238 | H76 | 4.97   | 1.061  | 16.312 |
| 239 | H77 | 5.346  | 2.098  | 17.68  |
| 240 | H78 | 2.997  | 0.715  | 12.225 |
| 241 | H79 | 2.771  | 2.456  | 12.329 |
| 242 | H80 | 5.274  | 0.791  | 12.75  |
| 243 | H81 | 5.274  | 2.538  | 12.945 |
| 244 | H82 | 7.041  | 1.047  | 10.929 |
| 245 | H83 | 7.497  | 1.368  | 12.589 |

|     |     |        |        |        |
|-----|-----|--------|--------|--------|
| 246 | H84 | 4.64   | 1.087  | 10.321 |
| 247 | H85 | 4.509  | 2.828  | 10.599 |
| 248 | H86 | 2.152  | 4.81   | 16.587 |
| 249 | H87 | 0.964  | 3.588  | 17.018 |
| 250 | H88 | 0.1    | 5.489  | 15.095 |
| 251 | H89 | -0.739 | 3.966  | 15.402 |
| 252 | H90 | 6.72   | 2.125  | 14.954 |
| 253 | H91 | 7.343  | 1.44   | 16.447 |
| 254 | H92 | 7.02   | 3.895  | 17.406 |
| 255 | H93 | 6.981  | 4.377  | 15.722 |
| 256 | H94 | 9.806  | 9.474  | 16.692 |
| 257 | H95 | 9.149  | 2.775  | 17.134 |
| 258 | H96 | 9.196  | 2.335  | 10.676 |
| 259 | H97 | 9.646  | 8.999  | 10.208 |
| 260 | H98 | 7.263  | 7.863  | 11.682 |
| 261 | H99 | 7.358  | 8.306  | 9.993  |
| 262 | H0  | 7.584  | 10.189 | 12.39  |
| 263 | H1  | 6.236  | 10.034 | 11.284 |
| 264 | H2  | 7.614  | 10.9   | 9.415  |
| 265 | H3  | 9.026  | 11.001 | 10.468 |
| 266 | H4  | 7.804  | 12.574 | 11.976 |
| 267 | H5  | 6.455  | 12.607 | 10.845 |
| 268 | H6  | 7.017  | 19.287 | 15.033 |
| 269 | H7  | 7      | 3.376  | 10.347 |
| 270 | H8  | 6.986  | 3.907  | 12.014 |
| 271 | H9  | -2.779 | 20.205 | 12.157 |
| 272 | H10 | 11.687 | 8.814  | 10.348 |
| 273 | H11 | 12.957 | 9.924  | 15.556 |
| 274 | H12 | 12.255 | 1.733  | 16.205 |
| 275 | H13 | 11.213 | 8.344  | 19.436 |
| 276 | H14 | 10.775 | 3.97   | 19.735 |
| 277 | H15 | 11.255 | 2.299  | 10.844 |
| 278 | H16 | 11.572 | 3.174  | 8.578  |
| 279 | H17 | 11.856 | 7.588  | 8.26   |
| 280 | H18 | -5.412 | 10.005 | 7.365  |
| 281 | H19 | -5.55  | 10.574 | 11.731 |
| 282 | H20 | -5.669 | 3.782  | 12.629 |
| 283 | H21 | -3.846 | 3.461  | 7.433  |
| 284 | H22 | -3.512 | 5.831  | 16.567 |
| 285 | H23 | -3.284 | 10.171 | 15.846 |
| 286 | H24 | -2.493 | 20.117 | 14.35  |
| 287 | H25 | -2.763 | 20.287 | 9.948  |
| 288 | H26 | 1.857  | 22.971 | 14.68  |
| 289 | H27 | 1.765  | 23.038 | 8.719  |
| 290 | H28 | 6.123  | 22.379 | 8.489  |
| 291 | H29 | 9.627  | 19.792 | 9.221  |
| 292 | H30 | 9.031  | 18.979 | 14.46  |
| 293 | H31 | 7.037  | 21.275 | 14.168 |
| 294 | H32 | -3.431 | 8.137  | 3.949  |
| 295 | H33 | -3.444 | 3.799  | 4.87   |
| 296 | H34 | -2.533 | 4.146  | 13.899 |
| 297 | H35 | 5.005  | 16.965 | 8.192  |
| 298 | H36 | 5.776  | 14.44  | 9.51   |
| 299 | H37 | 5.979  | 14.666 | 7.776  |
| 300 | H38 | 7.489  | 16.565 | 8.104  |
| 301 | H39 | 7.491  | 16.326 | 9.85   |
| 302 | H40 | 8.276  | 14.484 | 10.731 |
| 303 | H41 | 9.338  | 13.278 | 10.037 |
| 304 | H42 | 7.443  | 12.886 | 8.256  |
| 305 | H43 | 8.496  | 14.282 | 8.115  |
| 306 | H3  | 8.336  | 5.84   | 11.8   |
| 307 | H6  | 11.921 | 5.367  | 8.391  |
| 308 | H20 | 9.942  | 19.901 | 11.423 |

|     |      |        |        |        |
|-----|------|--------|--------|--------|
| 309 | H23  | 5.219  | 18.438 | 11.817 |
| 310 | H36  | 8.772  | 6.088  | 15.311 |
| 311 | H39  | 11.002 | 6.168  | 19.744 |
| 312 | H43  | 13.033 | 9.862  | 13.34  |
| 313 | H46  | 8.457  | 7.985  | 13.566 |
| 314 | H50  | 12.397 | 1.501  | 14.005 |
| 315 | H53  | 8.129  | 4.001  | 13.812 |
| 316 | H64  | -1.779 | 3.193  | 7.622  |
| 317 | H66  | -1.088 | 6.815  | 8.515  |
| 318 | H69  | -3.501 | 5.945  | 4.262  |
| 319 | H83  | 3.282  | 18.046 | 9.568  |
| 320 | H86  | 3.965  | 22.845 | 8.547  |
| 321 | H93  | 2.05   | 19.113 | 11.824 |
| 322 | H97  | 4.077  | 22.962 | 14.677 |
| 323 | CH00 | 3.724  | 18.045 | 14.26  |
| 324 | CH12 | -0.808 | 9.168  | 9.841  |
| 325 | CH15 | -5.614 | 10.352 | 9.534  |
| 326 | CH18 | -1.583 | 7.181  | 11.817 |
| 327 | CH21 | -3.386 | 8.025  | 16.365 |
| 328 | CH26 | -5.586 | 3.387  | 10.443 |
| 329 | CH29 | -0.882 | 4.887  | 10.707 |
| 330 | H1   | 5.056  | 16.779 | 9.944  |
| 331 | C1   | 2.904  | 6.92   | 12.088 |
| 332 | C2   | 4.237  | 6.453  | 12.029 |
| 333 | C3   | 2.156  | 7.013  | 10.902 |
| 334 | C4   | 2.72   | 6.668  | 9.673  |
| 335 | C5   | 4.032  | 6.21   | 9.615  |
| 336 | C6   | 4.784  | 6.101  | 10.784 |
| 337 | C7   | 4.985  | 6.357  | 13.216 |
| 338 | C8   | 4.429  | 6.726  | 14.441 |
| 339 | C9   | 3.119  | 7.19   | 14.498 |
| 340 | C10  | 2.359  | 7.282  | 13.331 |
| 341 | H1   | 1.126  | 7.357  | 10.926 |
| 342 | H2   | 6.009  | 5.995  | 13.194 |
| 343 | H3   | 5.018  | 6.649  | 15.351 |
| 344 | H4   | 2.683  | 7.474  | 15.452 |
| 345 | H5   | 1.334  | 7.638  | 13.403 |
| 346 | H6   | 5.808  | 5.744  | 10.712 |
| 347 | H7   | 2.134  | 6.753  | 8.762  |
| 348 | H8   | 4.471  | 5.937  | 8.659  |

**Table S3.** Cartesian coordinates of the structure of (anthracene)<sub>2</sub>C<sub>1</sub> optimized by MacroModel Ver 9.1 using the MMFFs force field.

| Center Number | Atomic Number | Coordinates (Angstroms) |        |        |
|---------------|---------------|-------------------------|--------|--------|
|               |               | X                       | Y      | Z      |
| 1             | C1            | 10.529                  | 4.192  | 9.84   |
| 2             | C2            | 9.502                   | 4.259  | 10.795 |
| 3             | C02B          | 0.507                   | 19.947 | 13.24  |
| 4             | C3            | 8.991                   | 5.527  | 11.134 |
| 5             | C4            | 9.486                   | 6.701  | 10.538 |
| 6             | C5            | 10.501                  | 6.572  | 9.574  |
| 7             | C6            | 11.017                  | 5.331  | 9.21   |
| 8             | C18           | 6.773                   | 18.721 | 10.403 |
| 9             | C19           | 8.14                    | 19.001 | 10.271 |
| 10            | C20           | 8.939                   | 19.231 | 11.389 |
| 11            | C21           | 8.379                   | 19.154 | 12.66  |
| 12            | C22           | 7.021                   | 18.87  | 12.846 |
| 13            | C23           | 6.233                   | 18.649 | 11.701 |
| 14            | C35           | 9.603                   | 7.408  | 16.852 |
| 15            | C36           | 9.228                   | 6.139  | 16.368 |
| 16            | C37           | 9.466                   | 4.962  | 17.109 |
| 17            | C38           | 10.108                  | 5.082  | 18.35  |
| 18            | C39           | 10.51                   | 6.322  | 18.842 |
| 19            | C40           | 10.248                  | 7.471  | 18.098 |
| 20            | C41           | 9.902                   | 8.778  | 14.703 |
| 21            | C42           | 11.168                  | 9.363  | 14.554 |
| 22            | C43           | 11.745                  | 9.532  | 13.298 |
| 23            | C44           | 11.059                  | 9.115  | 12.16  |
| 24            | C45           | 9.791                   | 8.519  | 12.247 |
| 25            | C46           | 9.249                   | 8.327  | 13.537 |
| 26            | C48           | 9.704                   | 3.161  | 15.319 |
| 27            | C49           | 10.955                  | 2.529  | 15.378 |
| 28            | C50           | 11.605                  | 2.091  | 14.226 |
| 29            | C51           | 11.002                  | 2.264  | 12.984 |
| 30            | C52           | 9.743                   | 2.869  | 12.868 |
| 31            | C53           | 9.135                   | 3.354  | 14.048 |
| 32            | C64           | -1.144                  | 4.234  | 8.217  |
| 33            | C65           | -1.467                  | 5.401  | 7.291  |
| 34            | C66           | -1.223                  | 6.729  | 7.681  |
| 35            | C67           | -1.597                  | 7.812  | 6.862  |
| 36            | C68           | -2.141                  | 7.535  | 5.598  |
| 37            | C69           | -2.401                  | 6.228  | 5.193  |
| 38            | C70           | -2.095                  | 5.181  | 6.057  |
| 39            | C82           | 2.354                   | 20.128 | 9.226  |
| 40            | C83           | 3.403                   | 19.195 | 9.348  |
| 41            | C84           | 4.748                   | 19.535 | 9.105  |
| 42            | C85           | 5.026                   | 20.873 | 8.782  |
| 43            | C86           | 4.016                   | 21.833 | 8.708  |
| 44            | C87           | 2.693                   | 21.455 | 8.927  |
| 45            | C88           | 0.311                   | 19.997 | 10.786 |
| 46            | C89           | -1.017                  | 20.428 | 10.932 |
| 47            | C91           | -0.826                  | 20.371 | 13.33  |
| 48            | C93           | 1.057                   | 19.759 | 11.955 |
| 49            | C95           | 2.765                   | 20.158 | 14.463 |
| 50            | C96           | 3.023                   | 21.536 | 14.543 |
| 51            | C97           | 4.323                   | 22.034 | 14.53  |
| 52            | C98           | 5.399                   | 21.155 | 14.431 |
| 53            | C99           | 5.204                   | 19.766 | 14.358 |
| 54            | C100          | 3.875                   | 19.296 | 14.37  |
| 55            | C111          | -2.467                  | 9.804  | 11.072 |
| 56            | C112          | -1.715                  | 9.51   | 9.916  |

|     |      |        |        |        |
|-----|------|--------|--------|--------|
| 57  | C113 | -2.292 | 9.496  | 8.631  |
| 58  | C114 | -3.677 | 9.71   | 8.537  |
| 59  | C115 | -4.456 | 9.953  | 9.666  |
| 60  | C116 | -3.847 | 10.008 | 10.917 |
| 61  | C117 | -2.097 | 8.718  | 13.359 |
| 62  | C118 | -1.823 | 7.406  | 12.924 |
| 63  | C119 | -2.094 | 6.286  | 13.736 |
| 64  | C120 | -2.623 | 6.515  | 15.016 |
| 65  | C121 | -2.874 | 7.804  | 15.482 |
| 66  | C122 | -2.604 | 8.893  | 14.656 |
| 67  | C124 | -2.379 | 4.554  | 11.871 |
| 68  | C125 | -3.718 | 4.167  | 11.718 |
| 69  | C126 | -4.232 | 3.817  | 10.471 |
| 70  | C127 | -3.408 | 3.839  | 9.346  |
| 71  | C128 | -2.065 | 4.235  | 9.44   |
| 72  | C129 | -1.586 | 4.619  | 10.711 |
| 73  | C1   | 6.178  | 17.311 | 14.595 |
| 74  | C2   | 5.803  | 17.06  | 16.061 |
| 75  | C3   | 6.174  | 15.65  | 16.536 |
| 76  | C4   | 5.52   | 14.521 | 15.734 |
| 77  | C5   | 6.005  | 13.153 | 16.227 |
| 78  | C6   | 5.423  | 12.013 | 15.389 |
| 79  | C7   | 5.851  | 10.62  | 15.864 |
| 80  | C8   | 7.355  | 10.369 | 15.732 |
| 81  | C9   | 7.722  | 8.929  | 16.124 |
| 82  | C10  | 5.881  | 18.498 | 9.182  |
| 83  | C11  | 0.555  | 18.257 | 8.992  |
| 84  | C12  | 0.885  | 19.723 | 9.393  |
| 85  | C13  | 0.831  | 17.964 | 7.509  |
| 86  | C14  | 0.492  | 16.527 | 7.102  |
| 87  | C15  | 1.424  | 15.487 | 7.729  |
| 88  | C16  | 1.096  | 14.078 | 7.227  |
| 89  | C17  | 1.682  | 11.589 | 7.479  |
| 90  | C18  | 1.947  | 13.026 | 7.94   |
| 91  | C19  | 0.214  | 11.174 | 7.602  |
| 92  | C20  | 0.027  | 9.663  | 7.413  |
| 93  | C21  | -1.466 | 9.252  | 7.36   |
| 94  | C22  | -1.83  | 9.929  | 12.462 |
| 95  | C23  | -0.319 | 10.274 | 12.504 |
| 96  | C24  | -0.014 | 11.673 | 11.948 |
| 97  | C25  | 1.482  | 11.992 | 11.908 |
| 98  | C26  | 2.164  | 12.131 | 13.271 |
| 99  | C27  | 1.599  | 13.223 | 14.184 |
| 100 | C28  | 1.622  | 14.614 | 13.549 |
| 101 | C29  | 1.301  | 15.699 | 14.577 |
| 102 | C30  | 1.258  | 17.082 | 13.924 |
| 103 | C31  | 1.112  | 18.185 | 14.984 |
| 104 | C32  | 1.318  | 19.648 | 14.501 |
| 105 | C33  | -0.293 | 4.498  | 13.402 |
| 106 | C34  | 0.38   | 4.117  | 8.505  |
| 107 | C35  | 0.715  | 2.74   | 9.103  |
| 108 | C36  | 1.975  | 2.743  | 9.967  |
| 109 | C37  | 1.492  | 3.673  | 15.031 |
| 110 | C38  | 3.01   | 2.651  | 16.836 |
| 111 | C39  | 2.131  | 1.386  | 10.662 |
| 112 | C40  | 4.391  | 2.975  | 16.259 |
| 113 | C41  | 5.427  | 1.978  | 16.789 |
| 114 | C42  | 3.187  | 1.38   | 11.764 |
| 115 | C43  | 5.601  | 1.359  | 12.408 |
| 116 | C44  | 7.07   | 1.436  | 11.996 |
| 117 | C45  | 4.621  | 1.467  | 11.241 |
| 118 | C46  | 1.926  | 3.676  | 16.501 |
| 119 | C47  | 0.175  | 4.439  | 14.864 |

|     |     |        |        |        |
|-----|-----|--------|--------|--------|
| 120 | C48 | 6.852  | 2.183  | 16.266 |
| 121 | C49 | 7.434  | 3.568  | 16.582 |
| 122 | C50 | 9.257  | 8.686  | 16.088 |
| 123 | C51 | 8.991  | 3.598  | 16.599 |
| 124 | C52 | 9.043  | 2.995  | 11.515 |
| 125 | C53 | 9.026  | 8.089  | 10.994 |
| 126 | C54 | 7.479  | 8.238  | 11.05  |
| 127 | C55 | 6.956  | 9.647  | 11.393 |
| 128 | C56 | 7.5    | 10.763 | 10.498 |
| 129 | C57 | 7.033  | 12.147 | 10.965 |
| 130 | C58 | 6.388  | 18.807 | 14.238 |
| 131 | C59 | 7.5    | 2.844  | 11.554 |
| 132 | C60 | -1.587 | 20.621 | 12.19  |
| 133 | O1  | 11.71  | 9.343  | 10.977 |
| 134 | O2  | 11.845 | 9.794  | 15.662 |
| 135 | O3  | 11.547 | 2.33   | 16.596 |
| 136 | O4  | 10.595 | 8.691  | 18.613 |
| 137 | O5  | 10.314 | 3.963  | 19.111 |
| 138 | O6  | 11.716 | 1.8    | 11.911 |
| 139 | O7  | 11.11  | 2.973  | 9.586  |
| 140 | O8  | 11.048 | 7.712  | 9.037  |
| 141 | O9  | -4.272 | 9.69   | 7.305  |
| 142 | O10 | -4.606 | 10.283 | 12.023 |
| 143 | O11 | -4.527 | 4.118  | 12.82  |
| 144 | O12 | -4.001 | 3.441  | 8.177  |
| 145 | O13 | -2.881 | 5.448  | 15.835 |
| 146 | O14 | -2.819 | 10.161 | 15.124 |
| 147 | O15 | -1.393 | 20.521 | 14.567 |
| 148 | O16 | -1.774 | 20.635 | 9.81   |
| 149 | O17 | 1.972  | 22.407 | 14.647 |
| 150 | O18 | 1.698  | 22.389 | 8.833  |
| 151 | O19 | 6.319  | 21.239 | 8.523  |
| 152 | O20 | 8.701  | 19.031 | 9.024  |
| 153 | O21 | 9.217  | 19.39  | 13.713 |
| 154 | O22 | 6.633  | 21.749 | 14.416 |
| 155 | O23 | -2.437 | 8.572  | 4.756  |
| 156 | O24 | -2.479 | 3.902  | 5.741  |
| 157 | C61 | -1.801 | 4.864  | 13.259 |
| 158 | C62 | 7.746  | 13.277 | 10.21  |
| 159 | C63 | 5.403  | 17.019 | 9.105  |
| 160 | C64 | 6.031  | 14.577 | 8.825  |
| 161 | C65 | 6.553  | 16.013 | 8.969  |
| 162 | C66 | 7.168  | 13.548 | 8.815  |
| 163 | H1  | 5.429  | 16.851 | 13.938 |
| 164 | H2  | 7.119  | 16.782 | 14.389 |
| 165 | H3  | 4.729  | 17.22  | 16.211 |
| 166 | H4  | 6.324  | 17.778 | 16.706 |
| 167 | H5  | 5.891  | 15.552 | 17.592 |
| 168 | H6  | 7.265  | 15.541 | 16.496 |
| 169 | H7  | 5.765  | 14.619 | 14.671 |
| 170 | H8  | 4.43   | 14.587 | 15.824 |
| 171 | H9  | 5.723  | 13.019 | 17.278 |
| 172 | H10 | 7.099  | 13.13  | 16.178 |
| 173 | H11 | 5.707  | 12.142 | 14.337 |
| 174 | H12 | 4.33   | 12.064 | 15.432 |
| 175 | H13 | 5.312  | 9.876  | 15.266 |
| 176 | H14 | 5.541  | 10.477 | 16.906 |
| 177 | H15 | 7.903  | 11.06  | 16.381 |
| 178 | H16 | 7.668  | 10.574 | 14.703 |
| 179 | H17 | 7.183  | 8.216  | 15.49  |
| 180 | H18 | 7.359  | 8.755  | 17.146 |
| 181 | H19 | 6.467  | 18.653 | 8.266  |
| 182 | H20 | -0.511 | 18.064 | 9.175  |



|     |     |        |        |        |
|-----|-----|--------|--------|--------|
| 183 | H21 | 1.093  | 17.556 | 9.638  |
| 184 | H22 | 0.334  | 20.346 | 8.675  |
| 185 | H23 | 1.877  | 18.164 | 7.255  |
| 186 | H24 | 0.226  | 18.646 | 6.898  |
| 187 | H25 | 0.56   | 16.454 | 6.01   |
| 188 | H26 | -0.549 | 16.305 | 7.369  |
| 189 | H27 | 1.329  | 15.507 | 8.82   |
| 190 | H28 | 2.467  | 15.729 | 7.488  |
| 191 | H29 | 1.263  | 14.02  | 6.145  |
| 192 | H30 | 0.032  | 13.884 | 7.404  |
| 193 | H31 | 2.306  | 10.919 | 8.083  |
| 194 | H32 | 2.006  | 11.472 | 6.438  |
| 195 | H33 | 3.009  | 13.25  | 7.788  |
| 196 | H34 | 1.765  | 13.09  | 9.018  |
| 197 | H35 | -0.376 | 11.704 | 6.845  |
| 198 | H36 | -0.167 | 11.48  | 8.581  |
| 199 | H37 | 0.557  | 9.122  | 8.204  |
| 200 | H38 | 0.51   | 9.373  | 6.47   |
| 201 | H39 | -1.899 | 9.922  | 6.605  |
| 202 | H40 | -2.322 | 10.803 | 12.91  |
| 203 | H41 | 0.269  | 9.518  | 11.972 |
| 204 | H42 | 0.021  | 10.241 | 13.548 |
| 205 | H43 | -0.549 | 12.43  | 12.532 |
| 206 | H44 | -0.395 | 11.758 | 10.926 |
| 207 | H45 | 1.625  | 12.92  | 11.344 |
| 208 | H46 | 1.999  | 11.212 | 11.334 |
| 209 | H47 | 3.227  | 12.338 | 13.095 |
| 210 | H48 | 2.126  | 11.178 | 13.807 |
| 211 | H49 | 2.195  | 13.235 | 15.105 |
| 212 | H50 | 0.576  | 12.97  | 14.487 |
| 213 | H51 | 0.894  | 14.663 | 12.731 |
| 214 | H52 | 2.612  | 14.807 | 13.117 |
| 215 | H53 | 2.064  | 15.684 | 15.364 |
| 216 | H54 | 0.336  | 15.489 | 15.056 |
| 217 | H55 | 0.408  | 17.118 | 13.232 |
| 218 | H56 | 2.158  | 17.225 | 13.32  |
| 219 | H57 | 1.787  | 17.988 | 15.827 |
| 220 | H58 | 0.095  | 18.099 | 15.393 |
| 221 | H59 | 0.881  | 20.241 | 15.32  |
| 222 | H60 | -0.126 | 3.513  | 12.946 |
| 223 | H61 | 0.341  | 5.211  | 12.86  |
| 224 | H62 | 0.729  | 4.93   | 9.152  |
| 225 | H63 | 0.943  | 4.226  | 7.568  |
| 226 | H64 | 0.827  | 2.014  | 8.288  |
| 227 | H65 | -0.119 | 2.378  | 9.716  |
| 228 | H66 | 1.9    | 3.534  | 10.722 |
| 229 | H67 | 2.851  | 2.957  | 9.346  |
| 230 | H68 | 1.353  | 2.64   | 14.689 |
| 231 | H69 | 2.272  | 4.119  | 14.406 |
| 232 | H70 | 3.091  | 2.6    | 17.93  |
| 233 | H71 | 2.693  | 1.656  | 16.502 |
| 234 | H72 | 2.355  | 0.611  | 9.92   |
| 235 | H73 | 1.175  | 1.111  | 11.126 |
| 236 | H74 | 4.673  | 3.994  | 16.546 |
| 237 | H75 | 4.36   | 2.936  | 15.165 |
| 238 | H76 | 5.111  | 0.96   | 16.527 |
| 239 | H77 | 5.446  | 2.024  | 17.885 |
| 240 | H78 | 3.075  | 0.449  | 12.334 |
| 241 | H79 | 2.994  | 2.201  | 12.465 |
| 242 | H80 | 5.44   | 0.4    | 12.917 |
| 243 | H81 | 5.389  | 2.143  | 13.144 |
| 244 | H82 | 7.275  | 0.717  | 11.194 |
| 245 | H83 | 7.664  | 1.114  | 12.859 |

|     |     |        |        |        |
|-----|-----|--------|--------|--------|
| 246 | H84 | 4.807  | 0.655  | 10.529 |
| 247 | H85 | 4.768  | 2.408  | 10.705 |
| 248 | H86 | 2.258  | 4.682  | 16.786 |
| 249 | H87 | 1.055  | 3.446  | 17.128 |
| 250 | H88 | 0.29   | 5.458  | 15.253 |
| 251 | H89 | -0.59  | 3.942  | 15.473 |
| 252 | H90 | 6.866  | 2.011  | 15.185 |
| 253 | H91 | 7.484  | 1.406  | 16.715 |
| 254 | H92 | 7.079  | 3.879  | 17.574 |
| 255 | H93 | 7.028  | 4.302  | 15.875 |
| 256 | H94 | 9.662  | 9.534  | 16.655 |
| 257 | H95 | 9.25   | 2.839  | 17.349 |
| 258 | H96 | 9.348  | 2.128  | 10.914 |
| 259 | H97 | 9.303  | 8.786  | 10.196 |
| 260 | H98 | 7.046  | 7.538  | 11.773 |
| 261 | H99 | 7.068  | 7.95   | 10.073 |
| 262 | H0  | 7.185  | 9.876  | 12.439 |
| 263 | H1  | 5.862  | 9.636  | 11.321 |
| 264 | H2  | 7.191  | 10.585 | 9.462  |
| 265 | H3  | 8.594  | 10.758 | 10.516 |
| 266 | H4  | 7.269  | 12.254 | 12.031 |
| 267 | H5  | 5.945  | 12.239 | 10.869 |
| 268 | H6  | 7.114  | 19.171 | 14.976 |
| 269 | H7  | 7.098  | 3.028  | 10.549 |
| 270 | H8  | 7.045  | 3.594  | 12.207 |
| 271 | H9  | -2.618 | 20.943 | 12.28  |
| 272 | H10 | 11.356 | 8.751  | 10.278 |
| 273 | H11 | 12.714 | 10.131 | 15.394 |
| 274 | H12 | 12.417 | 1.921  | 16.463 |
| 275 | H13 | 11.112 | 8.564  | 19.425 |
| 276 | H14 | 10.861 | 4.191  | 19.879 |
| 277 | H15 | 11.403 | 2.231  | 11.087 |
| 278 | H16 | 11.667 | 3.059  | 8.79   |
| 279 | H17 | 11.573 | 7.459  | 8.255  |
| 280 | H18 | -5.231 | 9.796  | 7.406  |
| 281 | H19 | -5.542 | 10.33  | 11.77  |
| 282 | H20 | -5.424 | 3.87   | 12.542 |
| 283 | H21 | -3.402 | 3.578  | 7.418  |
| 284 | H22 | -3.313 | 5.76   | 16.646 |
| 285 | H23 | -3.241 | 10.115 | 15.997 |
| 286 | H24 | -2.291 | 20.876 | 14.468 |
| 287 | H25 | -2.646 | 20.973 | 10.069 |
| 288 | H26 | 2.311  | 23.316 | 14.638 |
| 289 | H27 | 2.089  | 23.263 | 8.677  |
| 290 | H28 | 6.361  | 22.196 | 8.372  |
| 291 | H29 | 9.624  | 19.324 | 9.098  |
| 292 | H30 | 9.084  | 18.678 | 14.362 |
| 293 | H31 | 7.301  | 21.132 | 14.073 |
| 294 | H32 | -2.893 | 8.23   | 3.97   |
| 295 | H33 | -2.763 | 3.883  | 4.809  |
| 296 | H34 | -2.316 | 4.158  | 13.925 |
| 297 | H35 | 4.738  | 16.902 | 8.239  |
| 298 | H36 | 5.32   | 14.345 | 9.626  |
| 299 | H37 | 5.481  | 14.5   | 7.879  |
| 300 | H38 | 7.162  | 16.267 | 8.093  |
| 301 | H39 | 7.206  | 16.082 | 9.845  |
| 302 | H40 | 7.707  | 14.183 | 10.823 |
| 303 | H41 | 8.81   | 13.026 | 10.11  |
| 304 | H42 | 6.805  | 12.616 | 8.368  |
| 305 | H43 | 7.97   | 13.913 | 8.161  |
| 306 | H3  | 8.237  | 5.604  | 11.913 |
| 307 | H6  | 11.83  | 5.261  | 8.495  |
| 308 | H20 | 9.997  | 19.454 | 11.29  |

|     |      |        |        |        |
|-----|------|--------|--------|--------|
| 309 | H23  | 5.173  | 18.428 | 11.817 |
| 310 | H36  | 8.719  | 6.067  | 15.411 |
| 311 | H39  | 10.994 | 6.395  | 19.809 |
| 312 | H43  | 12.721 | 9.991  | 13.182 |
| 313 | H46  | 8.281  | 7.845  | 13.632 |
| 314 | H50  | 12.575 | 1.607  | 14.275 |
| 315 | H53  | 8.183  | 3.869  | 13.98  |
| 316 | H64  | -1.364 | 3.296  | 7.689  |
| 317 | H66  | -0.783 | 6.923  | 8.657  |
| 318 | H69  | -2.868 | 6.033  | 4.234  |
| 319 | H83  | 3.159  | 18.173 | 9.62   |
| 320 | H86  | 4.257  | 22.862 | 8.463  |
| 321 | H93  | 2.082  | 19.404 | 11.871 |
| 322 | H97  | 4.52   | 23.099 | 14.592 |
| 323 | CH00 | 3.707  | 18.229 | 14.308 |
| 324 | CH12 | -0.653 | 9.314  | 10.016 |
| 325 | CH15 | -5.524 | 10.119 | 9.569  |
| 326 | CH18 | -1.404 | 7.256  | 11.933 |
| 327 | CH21 | -3.264 | 7.959  | 16.482 |
| 328 | CH26 | -5.266 | 3.507  | 10.355 |
| 329 | CH29 | -0.559 | 4.954  | 10.813 |
| 330 | H1   | 4.817  | 16.753 | 9.994  |
| 331 | C1   | 4.832  | 5.2    | 8.553  |
| 332 | C2   | 4.521  | 5.611  | 7.257  |
| 333 | C3   | 3.765  | 6.761  | 7.058  |
| 334 | C4   | 3.32   | 7.501  | 8.154  |
| 335 | C5   | 3.614  | 7.095  | 9.466  |
| 336 | C6   | 3.165  | 7.822  | 10.583 |
| 337 | C7   | 3.478  | 7.416  | 11.892 |
| 338 | C8   | 3.041  | 8.14   | 13.012 |
| 339 | C9   | 3.372  | 7.732  | 14.305 |
| 340 | C10  | 4.152  | 6.597  | 14.497 |
| 341 | C11  | 4.589  | 5.86   | 13.396 |
| 342 | C12  | 4.256  | 6.257  | 12.09  |
| 343 | C13  | 4.691  | 5.529  | 10.974 |
| 344 | C14  | 4.384  | 5.931  | 9.665  |
| 345 | H1   | 5.428  | 4.3    | 8.689  |
| 346 | H2   | 4.871  | 5.034  | 6.405  |
| 347 | H3   | 3.525  | 7.088  | 6.049  |
| 348 | H4   | 2.744  | 8.403  | 7.973  |
| 349 | H5   | 2.439  | 9.034  | 12.885 |
| 350 | H6   | 3.023  | 8.306  | 15.16  |
| 351 | H7   | 4.414  | 6.283  | 15.503 |
| 352 | H8   | 5.189  | 4.97   | 13.567 |
| 353 | H9   | 5.287  | 4.635  | 11.125 |
| 354 | H10  | 2.57   | 8.72   | 10.43  |

**Table S4.** Cartesian coordinates of the structure of (phenanthrene)<sub>c</sub>-1 optimized by MacroModel Ver 9.1 using the MMFFs force field.

| Center Number | Atomic Number | Coordinates (Angstroms) |        |        |
|---------------|---------------|-------------------------|--------|--------|
|               |               | X                       | Y      | Z      |
| 1             | C1            | 10.589                  | 4.132  | 10.128 |
| 2             | C2            | 9.534                   | 4.219  | 11.05  |
| 3             | C02B          | 0.561                   | 20.2   | 13.361 |
| 4             | C3            | 9.021                   | 5.495  | 11.355 |
| 5             | C4            | 9.543                   | 6.658  | 10.758 |
| 6             | C5            | 10.589                  | 6.509  | 9.831  |
| 7             | C6            | 11.107                  | 5.26   | 9.5    |
| 8             | C18           | 6.74                    | 18.737 | 10.47  |
| 9             | C19           | 8.079                   | 19.135 | 10.338 |
| 10            | C20           | 8.838                   | 19.506 | 11.448 |
| 11            | C21           | 8.263                   | 19.446 | 12.714 |
| 12            | C22           | 6.964                   | 18.963 | 12.903 |
| 13            | C23           | 6.206                   | 18.631 | 11.766 |
| 14            | C35           | 9.479                   | 7.425  | 17.06  |
| 15            | C36           | 9.116                   | 6.148  | 16.587 |
| 16            | C37           | 9.343                   | 4.982  | 17.348 |
| 17            | C38           | 9.964                   | 5.121  | 18.598 |
| 18            | C39           | 10.353                  | 6.369  | 19.08  |
| 19            | C40           | 10.1                    | 7.507  | 18.317 |
| 20            | C41           | 9.841                   | 8.771  | 14.907 |
| 21            | C42           | 11.111                  | 9.357  | 14.793 |
| 22            | C43           | 11.727                  | 9.514  | 13.555 |
| 23            | C44           | 11.079                  | 9.088  | 12.399 |
| 24            | C45           | 9.808                   | 8.493  | 12.452 |
| 25            | C46           | 9.227                   | 8.309  | 13.725 |
| 26            | C48           | 9.609                   | 3.151  | 15.591 |
| 27            | C49           | 10.851                  | 2.506  | 15.684 |
| 28            | C50           | 11.523                  | 2.051  | 14.551 |
| 29            | C51           | 10.952                  | 2.222  | 13.293 |
| 30            | C52           | 9.703                   | 2.842  | 13.142 |
| 31            | C53           | 9.072                   | 3.34   | 14.305 |
| 32            | C64           | -1.172                  | 4.301  | 8.418  |
| 33            | C65           | -1.484                  | 5.445  | 7.459  |
| 34            | C66           | -1.274                  | 6.784  | 7.831  |
| 35            | C67           | -1.645                  | 7.846  | 6.982  |
| 36            | C68           | -2.146                  | 7.537  | 5.708  |
| 37            | C69           | -2.366                  | 6.218  | 5.318  |
| 38            | C70           | -2.068                  | 5.191  | 6.21   |
| 39            | C82           | 2.371                   | 20.197 | 9.302  |
| 40            | C83           | 3.398                   | 19.238 | 9.437  |
| 41            | C84           | 4.742                   | 19.529 | 9.134  |
| 42            | C85           | 5.043                   | 20.84  | 8.729  |
| 43            | C86           | 4.059                   | 21.825 | 8.641  |
| 44            | C87           | 2.735                   | 21.497 | 8.926  |
| 45            | C88           | 0.353                   | 20.193 | 10.907 |
| 46            | C89           | -0.955                  | 20.686 | 11.049 |
| 47            | C91           | -0.752                  | 20.686 | 13.446 |
| 48            | C93           | 1.098                   | 19.96  | 12.078 |
| 49            | C95           | 2.815                   | 20.326 | 14.61  |
| 50            | C96           | 3.135                   | 21.683 | 14.766 |
| 51            | C97           | 4.459                   | 22.12  | 14.797 |
| 52            | C98           | 5.495                   | 21.199 | 14.664 |
| 53            | C99           | 5.232                   | 19.83  | 14.498 |
| 54            | C100          | 3.884                   | 19.423 | 14.467 |
| 55            | C111          | -2.594                  | 9.885  | 11.157 |
| 56            | C112          | -1.822                  | 9.607  | 10.01  |

|     |      |        |        |        |
|-----|------|--------|--------|--------|
| 57  | C113 | -2.393 | 9.535  | 8.724  |
| 58  | C114 | -3.787 | 9.677  | 8.622  |
| 59  | C115 | -4.583 | 9.903  | 9.743  |
| 60  | C116 | -3.983 | 10.013 | 10.994 |
| 61  | C117 | -2.183 | 8.877  | 13.478 |
| 62  | C118 | -1.899 | 7.56   | 13.064 |
| 63  | C119 | -2.134 | 6.453  | 13.905 |
| 64  | C120 | -2.631 | 6.702  | 15.195 |
| 65  | C121 | -2.882 | 7.998  | 15.642 |
| 66  | C122 | -2.653 | 9.071  | 14.786 |
| 67  | C124 | -2.424 | 4.699  | 12.059 |
| 68  | C125 | -3.767 | 4.329  | 11.905 |
| 69  | C126 | -4.279 | 3.966  | 10.66  |
| 70  | C127 | -3.448 | 3.959  | 9.54   |
| 71  | C128 | -2.1   | 4.337  | 9.636  |
| 72  | C129 | -1.623 | 4.735  | 10.903 |
| 73  | C1   | 6.093  | 17.327 | 14.599 |
| 74  | C2   | 5.709  | 17.044 | 16.058 |
| 75  | C3   | 6.079  | 15.628 | 16.513 |
| 76  | C4   | 5.433  | 14.509 | 15.691 |
| 77  | C5   | 5.896  | 13.14  | 16.197 |
| 78  | C6   | 5.344  | 11.995 | 15.346 |
| 79  | C7   | 5.747  | 10.607 | 15.858 |
| 80  | C8   | 7.256  | 10.361 | 15.818 |
| 81  | C9   | 7.612  | 8.928  | 16.246 |
| 82  | C10  | 5.858  | 18.474 | 9.249  |
| 83  | C11  | 0.507  | 18.384 | 9.162  |
| 84  | C12  | 0.894  | 19.846 | 9.518  |
| 85  | C13  | 0.705  | 18.071 | 7.671  |
| 86  | C14  | 0.31   | 16.642 | 7.292  |
| 87  | C15  | 1.276  | 15.588 | 7.839  |
| 88  | C16  | 0.9    | 14.19  | 7.341  |
| 89  | C17  | 1.533  | 11.706 | 7.432  |
| 90  | C18  | 1.829  | 13.126 | 7.925  |
| 91  | C19  | 0.095  | 11.254 | 7.702  |
| 92  | C20  | -0.074 | 9.743  | 7.494  |
| 93  | C21  | -1.556 | 9.297  | 7.459  |
| 94  | C22  | -1.974 | 10.075 | 12.548 |
| 95  | C23  | -0.487 | 10.509 | 12.586 |
| 96  | C24  | -0.273 | 11.921 | 12.02  |
| 97  | C25  | 1.203  | 12.302 | 11.884 |
| 98  | C26  | 1.984  | 12.391 | 13.197 |
| 99  | C27  | 1.481  | 13.447 | 14.187 |
| 100 | C28  | 1.471  | 14.857 | 13.595 |
| 101 | C29  | 1.223  | 15.92  | 14.665 |
| 102 | C30  | 1.176  | 17.315 | 14.035 |
| 103 | C31  | 1.092  | 18.412 | 15.106 |
| 104 | C32  | 1.35   | 19.871 | 14.628 |
| 105 | C33  | -0.346 | 4.64   | 13.602 |
| 106 | C34  | 0.349  | 4.183  | 8.716  |
| 107 | C35  | 0.672  | 2.815  | 9.344  |
| 108 | C36  | 1.946  | 2.815  | 10.188 |
| 109 | C37  | 1.417  | 3.78   | 15.243 |
| 110 | C38  | 2.889  | 2.708  | 17.062 |
| 111 | C39  | 2.086  | 1.47   | 10.909 |
| 112 | C40  | 4.273  | 2.993  | 16.474 |
| 113 | C41  | 5.304  | 2.007  | 17.036 |
| 114 | C42  | 3.155  | 1.462  | 11.999 |
| 115 | C43  | 5.573  | 1.372  | 12.618 |
| 116 | C44  | 7.04   | 1.429  | 12.197 |
| 117 | C45  | 4.585  | 1.526  | 11.462 |
| 118 | C46  | 1.827  | 3.755  | 16.719 |
| 119 | C47  | 0.106  | 4.56   | 15.068 |

|     |     |        |        |        |
|-----|-----|--------|--------|--------|
| 120 | C48 | 6.734  | 2.196  | 16.516 |
| 121 | C49 | 7.32   | 3.583  | 16.814 |
| 122 | C50 | 9.149  | 8.692  | 16.27  |
| 123 | C51 | 8.876  | 3.61   | 16.853 |
| 124 | C52 | 9.04   | 2.967  | 11.769 |
| 125 | C53 | 9.08   | 8.055  | 11.179 |
| 126 | C54 | 7.534  | 8.219  | 11.185 |
| 127 | C55 | 7.015  | 9.635  | 11.504 |
| 128 | C56 | 7.563  | 10.739 | 10.596 |
| 129 | C57 | 7.102  | 12.128 | 11.056 |
| 130 | C58 | 6.365  | 18.828 | 14.304 |
| 131 | C59 | 7.495  | 2.834  | 11.772 |
| 132 | C60 | -1.507 | 20.942 | 12.304 |
| 133 | O1  | 11.766 | 9.302  | 11.235 |
| 134 | O2  | 11.75  | 9.799  | 15.919 |
| 135 | O3  | 11.413 | 2.31   | 16.916 |
| 136 | O4  | 10.435 | 8.735  | 18.822 |
| 137 | O5  | 10.16  | 4.014  | 19.378 |
| 138 | O6  | 11.686 | 1.74   | 12.243 |
| 139 | O7  | 11.165 | 2.906  | 9.904  |
| 140 | O8  | 11.163 | 7.638  | 9.298  |
| 141 | O9  | -4.375 | 9.601  | 7.388  |
| 142 | O10 | -4.76  | 10.269 | 12.092 |
| 143 | O11 | -4.584 | 4.308  | 13.002 |
| 144 | O12 | -4.039 | 3.548  | 8.374  |
| 145 | O13 | -2.858 | 5.649  | 16.04  |
| 146 | O14 | -2.875 | 10.347 | 15.232 |
| 147 | O15 | -1.308 | 20.887 | 14.681 |
| 148 | O16 | -1.713 | 20.891 | 9.927  |
| 149 | O17 | 2.124  | 22.595 | 14.905 |
| 150 | O18 | 1.764  | 22.456 | 8.82   |
| 151 | O19 | 6.333  | 21.159 | 8.403  |
| 152 | O20 | 8.646  | 19.164 | 9.093  |
| 153 | O21 | 8.947  | 19.916 | 13.805 |
| 154 | O22 | 6.759  | 21.728 | 14.707 |
| 155 | O23 | -2.436 | 8.553  | 4.839  |
| 156 | O24 | -2.416 | 3.901  | 5.903  |
| 157 | C61 | -1.85  | 5.022  | 13.446 |
| 158 | C62 | 7.776  | 13.251 | 10.256 |
| 159 | C63 | 5.361  | 17     | 9.207  |
| 160 | C64 | 5.981  | 14.548 | 8.966  |
| 161 | C65 | 6.507  | 15.985 | 9.087  |
| 162 | C66 | 7.118  | 13.52  | 8.898  |
| 163 | H1  | 5.322  | 16.919 | 13.933 |
| 164 | H2  | 7.013  | 16.772 | 14.367 |
| 165 | H3  | 4.634  | 17.2   | 16.201 |
| 166 | H4  | 6.221  | 17.75  | 16.723 |
| 167 | H5  | 5.789  | 15.516 | 17.565 |
| 168 | H6  | 7.171  | 15.522 | 16.478 |
| 169 | H7  | 5.703  | 14.61  | 14.634 |
| 170 | H8  | 4.341  | 14.584 | 15.758 |
| 171 | H9  | 5.581  | 13.008 | 17.24  |
| 172 | H10 | 6.991  | 13.116 | 16.184 |
| 173 | H11 | 5.676  | 12.111 | 14.307 |
| 174 | H12 | 4.249  | 12.052 | 15.336 |
| 175 | H13 | 5.245  | 9.856  | 15.239 |
| 176 | H14 | 5.377  | 10.474 | 16.882 |
| 177 | H15 | 7.763  | 11.061 | 16.492 |
| 178 | H16 | 7.628  | 10.56  | 14.808 |
| 179 | H17 | 7.1    | 8.204  | 15.603 |
| 180 | H18 | 7.212  | 8.768  | 17.257 |
| 181 | H19 | 6.455  | 18.589 | 8.334  |
| 182 | H20 | -0.554 | 18.222 | 9.398  |

|     |     |        |        |        |
|-----|-----|--------|--------|--------|
| 183 | H21 | 1.057  | 17.675 | 9.791  |
| 184 | H22 | 0.35   | 20.464 | 8.79   |
| 185 | H23 | 1.742  | 18.245 | 7.365  |
| 186 | H24 | 0.086  | 18.762 | 7.085  |
| 187 | H25 | 0.291  | 16.571 | 6.198  |
| 188 | H26 | -0.709 | 16.433 | 7.64   |
| 189 | H27 | 1.26   | 15.596 | 8.935  |
| 190 | H28 | 2.299  | 15.825 | 7.526  |
| 191 | H29 | 0.949  | 14.161 | 6.246  |
| 192 | H30 | -0.137 | 13.982 | 7.627  |
| 193 | H31 | 2.235  | 11.024 | 7.925  |
| 194 | H32 | 1.736  | 11.643 | 6.356  |
| 195 | H33 | 2.868  | 13.37  | 7.672  |
| 196 | H34 | 1.761  | 13.145 | 9.018  |
| 197 | H35 | -0.583 | 11.79  | 7.028  |
| 198 | H36 | -0.184 | 11.523 | 8.725  |
| 199 | H37 | 0.479  | 9.2    | 8.267  |
| 200 | H38 | 0.395  | 9.472  | 6.538  |
| 201 | H39 | -2.01  | 9.943  | 6.695  |
| 202 | H40 | -2.519 | 10.93  | 12.971 |
| 203 | H41 | 0.142  | 9.783  | 12.059 |
| 204 | H42 | -0.141 | 10.504 | 13.628 |
| 205 | H43 | -0.796 | 12.652 | 12.648 |
| 206 | H44 | -0.725 | 12     | 11.027 |
| 207 | H45 | 1.268  | 13.261 | 11.358 |
| 208 | H46 | 1.697  | 11.575 | 11.23  |
| 209 | H47 | 3.032  | 12.612 | 12.954 |
| 210 | H48 | 1.991  | 11.416 | 13.697 |
| 211 | H49 | 2.134  | 13.426 | 15.067 |
| 212 | H50 | 0.477  | 13.187 | 14.542 |
| 213 | H51 | 0.694  | 14.933 | 12.827 |
| 214 | H52 | 2.433  | 15.056 | 13.106 |
| 215 | H53 | 2.025  | 15.876 | 15.411 |
| 216 | H54 | 0.279  | 15.718 | 15.186 |
| 217 | H55 | 0.299  | 17.374 | 13.378 |
| 218 | H56 | 2.053  | 17.448 | 13.397 |
| 219 | H57 | 1.771  | 18.181 | 15.938 |
| 220 | H58 | 0.079  | 18.365 | 15.531 |
| 221 | H59 | 0.925  | 20.473 | 15.446 |
| 222 | H60 | -0.184 | 3.657  | 13.139 |
| 223 | H61 | 0.299  | 5.352  | 13.072 |
| 224 | H62 | 0.7    | 5.006  | 9.348  |
| 225 | H63 | 0.917  | 4.268  | 7.78   |
| 226 | H64 | 0.758  | 2.067  | 8.546  |
| 227 | H65 | -0.158 | 2.484  | 9.979  |
| 228 | H66 | 1.898  | 3.624  | 10.926 |
| 229 | H67 | 2.816  | 2.996  | 9.549  |
| 230 | H68 | 1.276  | 2.755  | 14.88  |
| 231 | H69 | 2.208  | 4.234  | 14.638 |
| 232 | H70 | 2.972  | 2.667  | 18.156 |
| 233 | H71 | 2.547  | 1.717  | 16.739 |
| 234 | H72 | 2.286  | 0.676  | 10.18  |
| 235 | H73 | 1.131  | 1.22   | 11.389 |
| 236 | H74 | 4.566  | 4.02   | 16.717 |
| 237 | H75 | 4.236  | 2.905  | 15.383 |
| 238 | H76 | 4.986  | 0.984  | 16.798 |
| 239 | H77 | 5.317  | 2.081  | 18.131 |
| 240 | H78 | 3.035  | 0.539  | 12.58  |
| 241 | H79 | 2.98   | 2.293  | 12.694 |
| 242 | H80 | 5.397  | 0.405  | 13.106 |
| 243 | H81 | 5.382  | 2.142  | 13.374 |
| 244 | H82 | 7.228  | 0.718  | 11.383 |
| 245 | H83 | 7.633  | 1.083  | 13.051 |

|     |     |        |        |        |
|-----|-----|--------|--------|--------|
| 246 | H84 | 4.746  | 0.724  | 10.733 |
| 247 | H85 | 4.748  | 2.474  | 10.943 |
| 248 | H86 | 2.174  | 4.751  | 17.021 |
| 249 | H87 | 0.943  | 3.535  | 17.331 |
| 250 | H88 | 0.225  | 5.572  | 15.472 |
| 251 | H89 | -0.668 | 4.06   | 15.662 |
| 252 | H90 | 6.755  | 2.007  | 15.438 |
| 253 | H91 | 7.359  | 1.424  | 16.982 |
| 254 | H92 | 6.953  | 3.914  | 17.796 |
| 255 | H93 | 6.928  | 4.306  | 16.089 |
| 256 | H94 | 9.528  | 9.55   | 16.839 |
| 257 | H95 | 9.122  | 2.863  | 17.619 |
| 258 | H96 | 9.35   | 2.092  | 11.182 |
| 259 | H97 | 9.388  | 8.742  | 10.383 |
| 260 | H98 | 7.073  | 7.528  | 11.9   |
| 261 | H99 | 7.149  | 7.926  | 10.199 |
| 262 | H0  | 7.236  | 9.879  | 12.547 |
| 263 | H1  | 5.922  | 9.626  | 11.424 |
| 264 | H2  | 7.249  | 10.553 | 9.563  |
| 265 | H3  | 8.658  | 10.728 | 10.61  |
| 266 | H4  | 7.377  | 12.253 | 12.111 |
| 267 | H5  | 6.011  | 12.209 | 10.999 |
| 268 | H6  | 7.126  | 19.098 | 15.049 |
| 269 | H7  | 7.111  | 3.035  | 10.764 |
| 270 | H8  | 7.042  | 3.584  | 12.425 |
| 271 | H9  | -2.523 | 21.311 | 12.39  |
| 272 | H10 | 11.437 | 8.698  | 10.534 |
| 273 | H11 | 12.626 | 10.139 | 15.675 |
| 274 | H12 | 12.282 | 1.892  | 16.807 |
| 275 | H13 | 10.938 | 8.62   | 19.643 |
| 276 | H14 | 10.692 | 4.254  | 20.153 |
| 277 | H15 | 11.401 | 2.171  | 11.408 |
| 278 | H16 | 11.746 | 2.978  | 9.124  |
| 279 | H17 | 11.713 | 7.371  | 8.538  |
| 280 | H18 | -5.339 | 9.656  | 7.485  |
| 281 | H19 | -5.696 | 10.257 | 11.836 |
| 282 | H20 | -5.482 | 4.068  | 12.724 |
| 283 | H21 | -3.427 | 3.65   | 7.621  |
| 284 | H22 | -3.269 | 5.973  | 16.857 |
| 285 | H23 | -3.263 | 10.313 | 16.121 |
| 286 | H24 | -2.188 | 21.281 | 14.576 |
| 287 | H25 | -2.565 | 21.279 | 10.181 |
| 288 | H26 | 2.506  | 23.486 | 14.956 |
| 289 | H27 | 2.175  | 23.31  | 8.614  |
| 290 | H28 | 6.391  | 22.104 | 8.192  |
| 291 | H29 | 9.532  | 19.556 | 9.15   |
| 292 | H30 | 9.867  | 20.093 | 13.543 |
| 293 | H31 | 7.425  | 21.058 | 14.459 |
| 294 | H32 | -2.857 | 8.19   | 4.045  |
| 295 | H33 | -2.676 | 3.861  | 4.965  |
| 296 | H34 | -2.378 | 4.331  | 14.117 |
| 297 | H35 | 4.693  | 16.873 | 8.345  |
| 298 | H36 | 5.31   | 14.315 | 9.801  |
| 299 | H37 | 5.386  | 14.471 | 8.048  |
| 300 | H38 | 7.115  | 16.223 | 8.206  |
| 301 | H39 | 7.161  | 16.068 | 9.96   |
| 302 | H40 | 7.778  | 14.161 | 10.866 |
| 303 | H41 | 8.831  | 12.994 | 10.095 |
| 304 | H42 | 6.73   | 12.586 | 8.476  |
| 305 | H43 | 7.88   | 13.882 | 8.197  |
| 306 | H3  | 8.243  | 5.588  | 12.108 |
| 307 | H6  | 11.941 | 5.174  | 8.812  |
| 308 | H20 | 9.856  | 19.857 | 11.322 |



|     |      |        |        |        |
|-----|------|--------|--------|--------|
| 309 | H23  | 5.174  | 18.311 | 11.891 |
| 310 | H36  | 8.624  | 6.062  | 15.621 |
| 311 | H39  | 10.82  | 6.457  | 20.055 |
| 312 | H43  | 12.707 | 9.973  | 13.466 |
| 313 | H46  | 8.257  | 7.825  | 13.792 |
| 314 | H50  | 12.485 | 1.555  | 14.626 |
| 315 | H53  | 8.128  | 3.866  | 14.213 |
| 316 | H64  | -1.397 | 3.351  | 7.915  |
| 317 | H66  | -0.865 | 7.004  | 8.815  |
| 318 | H69  | -2.798 | 5.997  | 4.349  |
| 319 | H83  | 3.137  | 18.238 | 9.769  |
| 320 | H86  | 4.318  | 22.832 | 8.334  |
| 321 | H93  | 2.106  | 19.561 | 11.996 |
| 322 | H97  | 4.704  | 23.17  | 14.925 |
| 323 | CH00 | 3.67   | 18.37  | 14.333 |
| 324 | CH12 | -0.751 | 9.467  | 10.115 |
| 325 | CH15 | -5.657 | 10.012 | 9.639  |
| 326 | CH18 | -1.506 | 7.395  | 12.063 |
| 327 | CH21 | -3.247 | 8.168  | 16.649 |
| 328 | CH26 | -5.317 | 3.669  | 10.543 |
| 329 | CH29 | -0.592 | 5.059  | 11.007 |
| 330 | H1   | 4.773  | 16.756 | 10.1   |
| 331 | C1   | 2.849  | 8.678  | 10.278 |
| 332 | C2   | 2.959  | 8.675  | 11.665 |
| 333 | C3   | 4.845  | 5.561  | 13.729 |
| 334 | C4   | 4.323  | 6.636  | 14.429 |
| 335 | C5   | 3.685  | 7.657  | 13.734 |
| 336 | C6   | 3.579  | 7.621  | 12.333 |
| 337 | C7   | 4.105  | 6.534  | 11.592 |
| 338 | C8   | 4.724  | 5.507  | 12.339 |
| 339 | C9   | 4.371  | 5.553  | 7.925  |
| 340 | C10  | 4.503  | 5.511  | 9.316  |
| 341 | C11  | 3.997  | 6.535  | 10.156 |
| 342 | C12  | 3.358  | 7.625  | 9.515  |
| 343 | C13  | 3.237  | 7.658  | 8.114  |
| 344 | C14  | 3.736  | 6.627  | 7.324  |
| 345 | H1   | 5.341  | 4.753  | 14.258 |
| 346 | H2   | 4.404  | 6.678  | 15.512 |
| 347 | H3   | 3.274  | 8.492  | 14.297 |
| 348 | H4   | 4.769  | 4.744  | 7.317  |
| 349 | H5   | 2.754  | 8.498  | 7.621  |
| 350 | H6   | 3.631  | 6.668  | 6.243  |
| 351 | H7   | 2.365  | 9.526  | 9.801  |
| 352 | H8   | 2.561  | 9.518  | 12.224 |
| 353 | H9   | 5.134  | 4.636  | 11.841 |
| 354 | H10  | 5.017  | 4.649  | 9.731  |

**Table S5.** Cartesian coordinates of the structure of (pyrene)<sub>c</sub>1 optimized by MacroModel Ver 9.1 using the MMFFs force field.

| Center Number | Atomic Number | Coordinates (Angstroms) |        |        |
|---------------|---------------|-------------------------|--------|--------|
|               |               | X                       | Y      | Z      |
| 1             | C1            | 11.233                  | 4.448  | 10.293 |
| 2             | C2            | 10.101                  | 4.611  | 11.107 |
| 3             | C02B          | 0.601                   | 19.968 | 13.166 |
| 4             | C3            | 9.73                    | 5.922  | 11.46  |
| 5             | C4            | 10.452                  | 7.044  | 11.007 |
| 6             | C5            | 11.582                  | 6.82   | 10.207 |
| 7             | C6            | 11.969                  | 5.537  | 9.83   |
| 8             | C18           | 7.025                   | 18.935 | 10.558 |
| 9             | C19           | 8.33                    | 19.449 | 10.525 |
| 10            | C20           | 8.98                    | 19.852 | 11.692 |
| 11            | C21           | 8.33                    | 19.707 | 12.915 |
| 12            | C22           | 7.067                   | 19.111 | 13.006 |
| 13            | C23           | 6.418                   | 18.748 | 11.813 |
| 14            | C35           | 9.46                    | 7.419  | 17.268 |
| 15            | C36           | 9.12                    | 6.186  | 16.674 |
| 16            | C37           | 9.177                   | 4.975  | 17.393 |
| 17            | C38           | 9.611                   | 5.022  | 18.727 |
| 18            | C39           | 9.976                   | 6.224  | 19.331 |
| 19            | C40           | 9.886                   | 7.41   | 18.605 |
| 20            | C41           | 10.234                  | 8.85   | 15.296 |
| 21            | C42           | 11.554                  | 9.296  | 15.451 |
| 22            | C43           | 12.404                  | 9.447  | 14.356 |
| 23            | C44           | 11.94                   | 9.163  | 13.074 |
| 24            | C45           | 10.624                  | 8.731  | 12.858 |
| 25            | C46           | 9.804                   | 8.541  | 13.992 |
| 26            | C48           | 9.543                   | 3.239  | 15.549 |
| 27            | C49           | 10.728                  | 2.508  | 15.715 |
| 28            | C50           | 11.476                  | 2.077  | 14.622 |
| 29            | C51           | 11.048                  | 2.37   | 13.33  |
| 30            | C52           | 9.87                    | 3.098  | 13.101 |
| 31            | C53           | 9.151                   | 3.55   | 14.233 |
| 32            | C64           | -1.758                  | 4.218  | 8.6    |
| 33            | C65           | -2.223                  | 5.362  | 7.702  |
| 34            | C66           | -2.041                  | 6.698  | 8.092  |
| 35            | C67           | -2.474                  | 7.769  | 7.287  |
| 36            | C68           | -3.063                  | 7.47   | 6.051  |
| 37            | C69           | -3.291                  | 6.151  | 5.659  |
| 38            | C70           | -2.894                  | 5.114  | 6.5    |
| 39            | C82           | 2.618                   | 20.016 | 9.195  |
| 40            | C83           | 3.721                   | 19.151 | 9.363  |
| 41            | C84           | 5.044                   | 19.571 | 9.119  |
| 42            | C85           | 5.241                   | 20.91  | 8.74   |
| 43            | C86           | 4.176                   | 21.801 | 8.615  |
| 44            | C87           | 2.879                   | 21.349 | 8.842  |
| 45            | C88           | 0.534                   | 19.901 | 10.706 |
| 46            | C89           | -0.799                  | 20.341 | 10.762 |
| 47            | C91           | -0.733                  | 20.401 | 13.165 |
| 48            | C93           | 1.22                    | 19.721 | 11.922 |
| 49            | C95           | 2.768                   | 20.227 | 14.539 |
| 50            | C96           | 3.02                    | 21.59  | 14.766 |
| 51            | C97           | 4.319                   | 22.08  | 14.883 |
| 52            | C98           | 5.399                   | 21.209 | 14.766 |
| 53            | C99           | 5.205                   | 19.84  | 14.521 |
| 54            | C100          | 3.879                   | 19.379 | 14.396 |
| 55            | C111          | -3.37                   | 9.726  | 11.488 |
| 56            | C112          | -2.593                  | 9.492  | 10.333 |

|     |      |        |        |        |
|-----|------|--------|--------|--------|
| 57  | C113 | -3.154 | 9.461  | 9.041  |
| 58  | C114 | -4.545 | 9.631  | 8.937  |
| 59  | C115 | -5.347 | 9.82   | 10.061 |
| 60  | C116 | -4.757 | 9.867  | 11.322 |
| 61  | C117 | -2.916 | 8.616  | 13.767 |
| 62  | C118 | -2.623 | 7.316  | 13.297 |
| 63  | C119 | -2.734 | 6.179  | 14.13  |
| 64  | C120 | -3.153 | 6.382  | 15.456 |
| 65  | C121 | -3.439 | 7.654  | 15.947 |
| 66  | C122 | -3.309 | 8.757  | 15.107 |
| 67  | C124 | -2.977 | 4.418  | 12.266 |
| 68  | C125 | -4.27  | 3.9    | 12.135 |
| 69  | C126 | -4.758 | 3.485  | 10.895 |
| 70  | C127 | -3.952 | 3.58   | 9.76   |
| 71  | C128 | -2.657 | 4.114  | 9.834  |
| 72  | C129 | -2.21  | 4.558  | 11.095 |
| 73  | C1   | 6.163  | 17.377 | 14.59  |
| 74  | C2   | 5.685  | 17.031 | 16.007 |
| 75  | C3   | 6.057  | 15.61  | 16.439 |
| 76  | C4   | 5.548  | 14.511 | 15.502 |
| 77  | C5   | 5.985  | 13.134 | 16.01  |
| 78  | C6   | 5.636  | 12.023 | 15.019 |
| 79  | C7   | 5.99   | 10.623 | 15.533 |
| 80  | C8   | 7.489  | 10.423 | 15.782 |
| 81  | C9   | 7.793  | 8.985  | 16.223 |
| 82  | C10  | 6.252  | 18.629 | 9.275  |
| 83  | C11  | 0.902  | 18.048 | 9.052  |
| 84  | C12  | 1.169  | 19.546 | 9.358  |
| 85  | C13  | 1.2    | 17.675 | 7.592  |
| 86  | C14  | 0.681  | 16.287 | 7.206  |
| 87  | C15  | 1.359  | 15.152 | 7.975  |
| 88  | C16  | 0.841  | 13.787 | 7.513  |
| 89  | C17  | 1.028  | 11.262 | 7.915  |
| 90  | C18  | 1.475  | 12.664 | 8.331  |
| 91  | C19  | -0.482 | 11.024 | 8.041  |
| 92  | C20  | -0.801 | 9.537  | 7.851  |
| 93  | C21  | -2.316 | 9.212  | 7.778  |
| 94  | C22  | -2.756 | 9.865  | 12.886 |
| 95  | C23  | -1.28  | 10.334 | 12.935 |
| 96  | C24  | -1.055 | 11.754 | 12.399 |
| 97  | C25  | 0.424  | 12.038 | 12.119 |
| 98  | C26  | 1.336  | 12.086 | 13.348 |
| 99  | C27  | 1.065  | 13.244 | 14.316 |
| 100 | C28  | 1.211  | 14.619 | 13.659 |
| 101 | C29  | 1.115  | 15.752 | 14.682 |
| 102 | C30  | 1.202  | 17.118 | 13.993 |
| 103 | C31  | 1.103  | 18.26  | 15.014 |
| 104 | C32  | 1.327  | 19.708 | 14.484 |
| 105 | C33  | -0.872 | 4.435  | 13.734 |
| 106 | C34  | -0.226 | 4.314  | 8.862  |
| 107 | C35  | 0.345  | 3.042  | 9.505  |
| 108 | C36  | 1.681  | 3.294  | 10.214 |
| 109 | C37  | 1.073  | 3.717  | 15.212 |
| 110 | C38  | 2.744  | 2.678  | 16.868 |
| 111 | C39  | 2.112  | 2.045  | 10.983 |
| 112 | C40  | 4.094  | 3.075  | 16.255 |
| 113 | C41  | 5.165  | 2.064  | 16.688 |
| 114 | C42  | 3.277  | 2.278  | 11.943 |
| 115 | C43  | 5.74   | 2.204  | 12.334 |
| 116 | C44  | 7.167  | 2.091  | 11.796 |
| 117 | C45  | 4.652  | 2.354  | 11.268 |
| 118 | C46  | 1.604  | 3.675  | 16.648 |
| 119 | C47  | -0.314 | 4.379  | 15.162 |

|     |     |        |        |        |
|-----|-----|--------|--------|--------|
| 120 | C48 | 6.584  | 2.325  | 16.171 |
| 121 | C49 | 7.168  | 3.681  | 16.59  |
| 122 | C50 | 9.302  | 8.737  | 16.505 |
| 123 | C51 | 8.715  | 3.656  | 16.767 |
| 124 | C52 | 9.378  | 3.388  | 11.678 |
| 125 | C53 | 10.092 | 8.465  | 11.451 |
| 126 | C54 | 8.593  | 8.806  | 11.218 |
| 127 | C55 | 8.208  | 10.274 | 11.473 |
| 128 | C56 | 8.747  | 11.25  | 10.424 |
| 129 | C57 | 8.45   | 12.704 | 10.818 |
| 130 | C58 | 6.39   | 18.896 | 14.36  |
| 131 | C59 | 7.832  | 3.449  | 11.515 |
| 132 | C60 | -1.432 | 20.6   | 11.976 |
| 133 | O1  | 12.849 | 9.339  | 12.066 |
| 134 | O2  | 12.015 | 9.6    | 16.703 |
| 135 | O3  | 11.153 | 2.2    | 16.979 |
| 136 | O4  | 10.186 | 8.594  | 19.222 |
| 137 | O5  | 9.643  | 3.869  | 19.464 |
| 138 | O6  | 11.848 | 1.888  | 12.329 |
| 139 | O7  | 11.667 | 3.174  | 10.021 |
| 140 | O8  | 12.363 | 7.895  | 9.858  |
| 141 | O9  | -5.126 | 9.616  | 7.698  |
| 142 | O10 | -5.54  | 10.075 | 12.425 |
| 143 | O11 | -5.057 | 3.779  | 13.246 |
| 144 | O12 | -4.514 | 3.113  | 8.601  |
| 145 | O13 | -3.266 | 5.304  | 16.293 |
| 146 | O14 | -3.548 | 10.01  | 15.604 |
| 147 | O15 | -1.368 | 20.607 | 14.361 |
| 148 | O16 | -1.5   | 20.489 | 9.594  |
| 149 | O17 | 1.964  | 22.452 | 14.89  |
| 150 | O18 | 1.83   | 22.217 | 8.699  |
| 151 | O19 | 6.51   | 21.35  | 8.477  |
| 152 | O20 | 8.971  | 19.565 | 9.322  |
| 153 | O21 | 8.895  | 20.206 | 14.059 |
| 154 | O22 | 6.633  | 21.788 | 14.908 |
| 155 | O23 | -3.426 | 8.494  | 5.22   |
| 156 | O24 | -3.217 | 3.817  | 6.193  |
| 157 | C61 | -2.394 | 4.767  | 13.644 |
| 158 | C62 | 8.987  | 13.709 | 9.792  |
| 159 | C63 | 5.922  | 17.114 | 9.152  |
| 160 | C64 | 6.841  | 14.766 | 8.812  |
| 161 | C65 | 7.184  | 16.246 | 9.025  |
| 162 | C66 | 8.083  | 13.897 | 8.568  |
| 163 | H1  | 5.461  | 16.96  | 13.858 |
| 164 | H2  | 7.121  | 16.868 | 14.411 |
| 165 | H3  | 4.598  | 17.153 | 16.077 |
| 166 | H4  | 6.127  | 17.726 | 16.732 |
| 167 | H5  | 5.661  | 15.438 | 17.447 |
| 168 | H6  | 7.149  | 15.542 | 16.517 |
| 169 | H7  | 5.947  | 14.661 | 14.492 |
| 170 | H8  | 4.455  | 14.555 | 15.432 |
| 171 | H9  | 5.509  | 12.932 | 16.977 |
| 172 | H10 | 7.068  | 13.151 | 16.177 |
| 173 | H11 | 6.151  | 12.201 | 14.067 |
| 174 | H12 | 4.56   | 12.052 | 14.807 |
| 175 | H13 | 5.649  | 9.892  | 14.79  |
| 176 | H14 | 5.432  | 10.422 | 16.456 |
| 177 | H15 | 7.834  | 11.106 | 16.566 |
| 178 | H16 | 8.041  | 10.671 | 14.871 |
| 179 | H17 | 7.408  | 8.281  | 15.478 |
| 180 | H18 | 7.223  | 8.788  | 17.142 |
| 181 | H19 | 6.889  | 18.84  | 8.406  |
| 182 | H20 | -0.157 | 17.829 | 9.246  |

|     |     |        |        |        |
|-----|-----|--------|--------|--------|
| 183 | H21 | 1.468  | 17.407 | 9.738  |
| 184 | H22 | 0.615  | 20.089 | 8.579  |
| 185 | H23 | 2.276  | 17.724 | 7.393  |
| 186 | H24 | 0.723  | 18.407 | 6.929  |
| 187 | H25 | 0.849  | 16.143 | 6.131  |
| 188 | H26 | -0.403 | 16.246 | 7.364  |
| 189 | H27 | 1.167  | 15.26  | 9.048  |
| 190 | H28 | 2.445  | 15.205 | 7.831  |
| 191 | H29 | 1.067  | 13.644 | 6.449  |
| 192 | H30 | -0.248 | 13.765 | 7.623  |
| 193 | H31 | 1.562  | 10.539 | 8.544  |
| 194 | H32 | 1.341  | 11.072 | 6.881  |
| 195 | H33 | 2.566  | 12.719 | 8.238  |
| 196 | H34 | 1.246  | 12.813 | 9.391  |
| 197 | H35 | -1.014 | 11.61  | 7.283  |
| 198 | H36 | -0.828 | 11.364 | 9.022  |
| 199 | H37 | -0.312 | 8.961  | 8.644  |
| 200 | H38 | -0.331 | 9.211  | 6.912  |
| 201 | H39 | -2.711 | 9.896  | 7.016  |
| 202 | H40 | -3.319 | 10.685 | 13.352 |
| 203 | H41 | -0.65  | 9.636  | 12.382 |
| 204 | H42 | -0.925 | 10.305 | 13.973 |
| 205 | H43 | -1.466 | 12.487 | 13.102 |
| 206 | H44 | -1.599 | 11.894 | 11.459 |
| 207 | H45 | 0.499  | 12.982 | 11.569 |
| 208 | H46 | 0.807  | 11.267 | 11.438 |
| 209 | H47 | 2.373  | 12.163 | 12.999 |
| 210 | H48 | 1.273  | 11.14  | 13.898 |
| 211 | H49 | 1.778  | 13.164 | 15.147 |
| 212 | H50 | 0.065  | 13.144 | 14.753 |
| 213 | H51 | 0.426  | 14.756 | 12.907 |
| 214 | H52 | 2.175  | 14.68  | 13.14  |
| 215 | H53 | 1.926  | 15.655 | 15.415 |
| 216 | H54 | 0.168  | 15.676 | 15.231 |
| 217 | H55 | 0.379  | 17.197 | 13.273 |
| 218 | H56 | 2.132  | 17.174 | 13.421 |
| 219 | H57 | 1.781  | 18.071 | 15.856 |
| 220 | H58 | 0.089  | 18.215 | 15.437 |
| 221 | H59 | 0.828  | 20.317 | 15.253 |
| 222 | H60 | -0.704 | 3.454  | 13.269 |
| 223 | H61 | -0.283 | 5.155  | 13.159 |
| 224 | H62 | 0.007  | 5.188  | 9.478  |
| 225 | H63 | 0.299  | 4.477  | 7.911  |
| 226 | H64 | 0.472  | 2.272  | 8.735  |
| 227 | H65 | -0.363 | 2.633  | 10.234 |
| 228 | H66 | 1.565  | 4.126  | 10.918 |
| 229 | H67 | 2.449  | 3.58   | 9.487  |
| 230 | H68 | 0.994  | 2.697  | 14.817 |
| 231 | H69 | 1.776  | 4.258  | 14.569 |
| 232 | H70 | 2.876  | 2.568  | 17.952 |
| 233 | H71 | 2.445  | 1.692  | 16.493 |
| 234 | H72 | 2.349  | 1.235  | 10.283 |
| 235 | H73 | 1.262  | 1.697  | 11.585 |
| 236 | H74 | 4.367  | 4.078  | 16.598 |
| 237 | H75 | 4.022  | 3.103  | 15.163 |
| 238 | H76 | 4.862  | 1.064  | 16.354 |
| 239 | H77 | 5.2    | 2.025  | 17.784 |
| 240 | H78 | 3.278  | 1.439  | 12.651 |
| 241 | H79 | 3.105  | 3.183  | 12.539 |
| 242 | H80 | 5.538  | 1.283  | 12.898 |
| 243 | H81 | 5.667  | 3.027  | 13.055 |
| 244 | H82 | 7.192  | 1.47   | 10.892 |
| 245 | H83 | 7.745  | 1.545  | 12.55  |

|     |     |        |        |        |
|-----|-----|--------|--------|--------|
| 246 | H84 | 4.75   | 1.546  | 10.533 |
| 247 | H85 | 4.764  | 3.303  | 10.734 |
| 248 | H86 | 1.913  | 4.678  | 16.962 |
| 249 | H87 | 0.785  | 3.381  | 17.317 |
| 250 | H88 | -0.254 | 5.391  | 15.578 |
| 251 | H89 | -0.998 | 3.803  | 15.796 |
| 252 | H90 | 6.598  | 2.24   | 15.081 |
| 253 | H91 | 7.218  | 1.514  | 16.551 |
| 254 | H92 | 6.724  | 3.976  | 17.551 |
| 255 | H93 | 6.859  | 4.446  | 15.868 |
| 256 | H94 | 9.583  | 9.562  | 17.172 |
| 257 | H95 | 8.869  | 2.857  | 17.504 |
| 258 | H96 | 9.645  | 2.517  | 11.065 |
| 259 | H97 | 10.606 | 9.162  | 10.781 |
| 260 | H98 | 7.963  | 8.187  | 11.86  |
| 261 | H99 | 8.318  | 8.544  | 10.187 |
| 262 | H0  | 8.537  | 10.584 | 12.47  |
| 263 | H1  | 7.113  | 10.342 | 11.478 |
| 264 | H2  | 8.3    | 11.019 | 9.452  |
| 265 | H3  | 9.831  | 11.134 | 10.318 |
| 266 | H4  | 8.94   | 12.905 | 11.779 |
| 267 | H5  | 7.376  | 12.844 | 10.978 |
| 268 | H6  | 7.093  | 19.165 | 15.159 |
| 269 | H7  | 7.578  | 3.753  | 10.491 |
| 270 | H8  | 7.411  | 4.211  | 12.17  |
| 271 | H9  | -2.465 | 20.928 | 11.996 |
| 272 | H10 | 12.576 | 8.831  | 11.272 |
| 273 | H11 | 12.95  | 9.854  | 16.645 |
| 274 | H12 | 12.001 | 1.731  | 16.924 |
| 275 | H13 | 10.566 | 8.416  | 20.097 |
| 276 | H14 | 10.055 | 4.046  | 20.324 |
| 277 | H15 | 11.668 | 2.362  | 11.489 |
| 278 | H16 | 12.328 | 3.221  | 9.305  |
| 279 | H17 | 12.991 | 7.607  | 9.17   |
| 280 | H18 | -6.088 | 9.695  | 7.789  |
| 281 | H19 | -6.473 | 10.089 | 12.162 |
| 282 | H20 | -5.925 | 3.433  | 12.983 |
| 283 | H21 | -3.956 | 3.336  | 7.829  |
| 284 | H22 | -3.64  | 5.591  | 17.142 |
| 285 | H23 | -3.881 | 9.939  | 16.513 |
| 286 | H24 | -2.257 | 20.96  | 14.197 |
| 287 | H25 | -2.379 | 20.85  | 9.79   |
| 288 | H26 | 2.304  | 23.355 | 15     |
| 289 | H27 | 2.169  | 23.108 | 8.52   |
| 290 | H28 | 6.491  | 22.299 | 8.279  |
| 291 | H29 | 9.815  | 20.026 | 9.449  |
| 292 | H30 | 9.816  | 20.459 | 13.866 |
| 293 | H31 | 7.343  | 21.162 | 14.667 |
| 294 | H32 | -3.907 | 8.137  | 4.456  |
| 295 | H33 | -3.544 | 3.787  | 5.276  |
| 296 | H34 | -2.868 | 4.047  | 14.325 |
| 297 | H35 | 5.3    | 16.955 | 8.261  |
| 298 | H36 | 6.269  | 14.388 | 9.666  |
| 299 | H37 | 6.189  | 14.68  | 7.934  |
| 300 | H38 | 7.787  | 16.603 | 8.181  |
| 301 | H39 | 7.793  | 16.355 | 9.928  |
| 302 | H40 | 9.147  | 14.671 | 10.29  |
| 303 | H41 | 9.976  | 13.38  | 9.452  |
| 304 | H42 | 7.762  | 12.918 | 8.192  |
| 305 | H43 | 8.675  | 14.353 | 7.765  |
| 306 | H3  | 8.9    | 6.068  | 12.143 |
| 307 | H6  | 12.864 | 5.384  | 9.237  |
| 308 | H20 | 9.969  | 20.293 | 11.644 |

|     |      |        |        |        |
|-----|------|--------|--------|--------|
| 309 | H23  | 5.411  | 18.339 | 11.86  |
| 310 | H36  | 8.779  | 6.173  | 15.642 |
| 311 | H39  | 10.294 | 6.24   | 20.367 |
| 312 | H43  | 13.426 | 9.789  | 14.479 |
| 313 | H46  | 8.795  | 8.169  | 13.849 |
| 314 | H50  | 12.39  | 1.506  | 14.754 |
| 315 | H53  | 8.25   | 4.137  | 14.093 |
| 316 | H64  | -1.866 | 3.267  | 8.061  |
| 317 | H66  | -1.579 | 6.912  | 9.053  |
| 318 | H69  | -3.791 | 5.937  | 4.72   |
| 319 | H83  | 3.541  | 18.127 | 9.675  |
| 320 | H86  | 4.354  | 22.831 | 8.327  |
| 321 | H93  | 2.244  | 19.358 | 11.904 |
| 322 | H97  | 4.511  | 23.132 | 15.069 |
| 323 | CH00 | 3.712  | 18.329 | 14.191 |
| 324 | CH12 | -1.523 | 9.352  | 10.44  |
| 325 | CH15 | -6.419 | 9.945  | 9.954  |
| 326 | CH18 | -2.3   | 7.19   | 12.268 |
| 327 | CH21 | -3.744 | 7.786  | 16.98  |
| 328 | CH26 | -5.756 | 3.07   | 10.794 |
| 329 | CH29 | -1.222 | 4.998  | 11.182 |
| 330 | H1   | 5.338  | 16.764 | 10.012 |
| 331 | C1   | 1.071  | 7.505  | 11.77  |
| 332 | C2   | 1.111  | 7.58   | 13.166 |
| 333 | C3   | 4.691  | 6.859  | 15.234 |
| 334 | C4   | 3.537  | 7.18   | 15.945 |
| 335 | C5   | 2.347  | 7.428  | 15.265 |
| 336 | C6   | 2.299  | 7.356  | 13.866 |
| 337 | C7   | 3.468  | 7.044  | 13.142 |
| 338 | C8   | 4.673  | 6.795  | 13.833 |
| 339 | C9   | 4.558  | 6.621  | 9.599  |
| 340 | C10  | 4.6    | 6.678  | 11     |
| 341 | C11  | 3.43   | 6.98   | 11.725 |
| 342 | C12  | 2.224  | 7.219  | 11.034 |
| 343 | C13  | 2.208  | 7.159  | 9.632  |
| 344 | C14  | 3.367  | 6.862  | 8.919  |
| 345 | C15  | 5.823  | 6.493  | 13.097 |
| 346 | C16  | 5.784  | 6.439  | 11.7   |
| 347 | H1   | 5.606  | 6.662  | 15.787 |
| 348 | H2   | 3.564  | 7.231  | 17.031 |
| 349 | H3   | 1.453  | 7.668  | 15.837 |
| 350 | H4   | 5.453  | 6.388  | 9.027  |
| 351 | H5   | 1.29   | 7.338  | 9.08   |
| 352 | H6   | 3.341  | 6.816  | 7.833  |
| 353 | H7   | 6.763  | 6.3    | 13.607 |
| 354 | H8   | 6.692  | 6.211  | 11.151 |
| 355 | H9   | 0.126  | 7.673  | 11.261 |
| 356 | H10  | 0.199  | 7.806  | 13.711 |

**Table S6.** Cartesian coordinates of the structure of (benz[*a*]anthracene)<sub>c</sub>1 optimized by MacroModel Ver 9.1 using the MMFFs force field.

| Center Number | Atomic Number | Coordinates (Angstroms) |        |        |
|---------------|---------------|-------------------------|--------|--------|
|               |               | X                       | Y      | Z      |
| 1             | C1            | 10.542                  | 4.443  | 10.118 |
| 2             | C2            | 9.489                   | 4.555  | 11.042 |
| 3             | C02B          | 0.524                   | 20.03  | 13.189 |
| 4             | C3            | 9.097                   | 5.843  | 11.448 |
| 5             | C4            | 9.758                   | 6.991  | 10.971 |
| 6             | C5            | 10.808                  | 6.819  | 10.054 |
| 7             | C6            | 11.19                   | 5.56   | 9.603  |
| 8             | C18           | 6.798                   | 18.973 | 10.352 |
| 9             | C19           | 8.104                   | 19.472 | 10.231 |
| 10            | C20           | 8.825                   | 19.895 | 11.348 |
| 11            | C21           | 8.248                   | 19.784 | 12.61  |
| 12            | C22           | 6.988                   | 19.202 | 12.788 |
| 13            | C23           | 6.265                   | 18.822 | 11.644 |
| 14            | C35           | 9.117                   | 7.254  | 17.38  |
| 15            | C36           | 8.834                   | 6.021  | 16.756 |
| 16            | C37           | 8.882                   | 4.804  | 17.468 |
| 17            | C38           | 9.208                   | 4.851  | 18.833 |
| 18            | C39           | 9.493                   | 6.055  | 19.472 |
| 19            | C40           | 9.439                   | 7.243  | 18.747 |
| 20            | C41           | 9.881                   | 8.633  | 15.355 |
| 21            | C42           | 11.236                  | 8.981  | 15.43  |
| 22            | C43           | 12.012                  | 9.123  | 14.282 |
| 23            | C44           | 11.438                  | 8.924  | 13.028 |
| 24            | C45           | 10.087                  | 8.57   | 12.894 |
| 25            | C46           | 9.341                   | 8.387  | 14.077 |
| 26            | C48           | 9.335                   | 3.178  | 15.533 |
| 27            | C49           | 10.605                  | 2.589  | 15.618 |
| 28            | C50           | 11.322                  | 2.241  | 14.476 |
| 29            | C51           | 10.775                  | 2.474  | 13.217 |
| 30            | C52           | 9.514                   | 3.074  | 13.07  |
| 31            | C53           | 8.828                   | 3.451  | 14.248 |
| 32            | C64           | -1.765                  | 4.23   | 8.557  |
| 33            | C65           | -2.184                  | 5.376  | 7.64   |
| 34            | C66           | -1.911                  | 6.709  | 7.985  |
| 35            | C67           | -2.351                  | 7.779  | 7.183  |
| 36            | C68           | -3.008                  | 7.483  | 5.98   |
| 37            | C69           | -3.301                  | 6.169  | 5.622  |
| 38            | C70           | -2.915                  | 5.134  | 6.47   |
| 39            | C82           | 2.347                   | 20.108 | 9.13   |
| 40            | C83           | 3.434                   | 19.219 | 9.274  |
| 41            | C84           | 4.76                    | 19.603 | 8.987  |
| 42            | C85           | 4.974                   | 20.931 | 8.577  |
| 43            | C86           | 3.926                   | 21.845 | 8.474  |
| 44            | C87           | 2.627                   | 21.43  | 8.752  |
| 45            | C88           | 0.331                   | 20.003 | 10.735 |
| 46            | C89           | -1                      | 20.433 | 10.869 |
| 47            | C91           | -0.811                  | 20.451 | 13.266 |
| 48            | C93           | 1.081                   | 19.812 | 11.911 |
| 49            | C95           | 2.753                   | 20.284 | 14.463 |
| 50            | C96           | 2.986                   | 21.657 | 14.64  |
| 51            | C97           | 4.279                   | 22.175 | 14.694 |
| 52            | C98           | 5.372                   | 21.322 | 14.563 |
| 53            | C99           | 5.196                   | 19.942 | 14.376 |
| 54            | C100          | 3.877                   | 19.451 | 14.32  |
| 55            | C111          | -2.716                  | 9.763  | 11.451 |
| 56            | C112          | -2.097                  | 9.49   | 10.214 |



|     |      |        |        |        |
|-----|------|--------|--------|--------|
| 57  | C113 | -2.819 | 9.476  | 9.004  |
| 58  | C114 | -4.208 | 9.676  | 9.072  |
| 59  | C115 | -4.856 | 9.899  | 10.285 |
| 60  | C116 | -4.108 | 9.948  | 11.458 |
| 61  | C117 | -2.083 | 8.704  | 13.705 |
| 62  | C118 | -1.974 | 7.371  | 13.255 |
| 63  | C119 | -2.19  | 6.276  | 14.119 |
| 64  | C120 | -2.489 | 6.555  | 15.464 |
| 65  | C121 | -2.556 | 7.861  | 15.944 |
| 66  | C122 | -2.347 | 8.921  | 15.067 |
| 67  | C124 | -2.767 | 4.555  | 12.287 |
| 68  | C125 | -4.122 | 4.208  | 12.215 |
| 69  | C126 | -4.714 | 3.859  | 11.002 |
| 70  | C127 | -3.955 | 3.852  | 9.832  |
| 71  | C128 | -2.602 | 4.229  | 9.841  |
| 72  | C129 | -2.04  | 4.6    | 11.082 |
| 73  | C1   | 6.219  | 17.5   | 14.472 |
| 74  | C2   | 5.839  | 17.188 | 15.926 |
| 75  | C3   | 6.246  | 15.779 | 16.372 |
| 76  | C4   | 5.689  | 14.653 | 15.497 |
| 77  | C5   | 6.083  | 13.283 | 16.059 |
| 78  | C6   | 5.657  | 12.15  | 15.124 |
| 79  | C7   | 5.887  | 10.753 | 15.706 |
| 80  | C8   | 7.353  | 10.435 | 16.001 |
| 81  | C9   | 7.529  | 8.97   | 16.434 |
| 82  | C10  | 5.951  | 18.637 | 9.123  |
| 83  | C11  | 0.578  | 18.193 | 9.004  |
| 84  | C12  | 0.894  | 19.674 | 9.35   |
| 85  | C13  | 0.769  | 17.885 | 7.51   |
| 86  | C14  | 0.263  | 16.497 | 7.109  |
| 87  | C15  | 1.105  | 15.359 | 7.685  |
| 88  | C16  | 0.597  | 13.997 | 7.204  |
| 89  | C17  | 1.038  | 11.468 | 7.316  |
| 90  | C18  | 1.456  | 12.868 | 7.771  |
| 91  | C19  | -0.401 | 11.107 | 7.687  |
| 92  | C20  | -0.656 | 9.605  | 7.508  |
| 93  | C21  | -2.151 | 9.223  | 7.645  |
| 94  | C22  | -1.926 | 9.899  | 12.759 |
| 95  | C23  | -0.43  | 10.29  | 12.627 |
| 96  | C24  | -0.255 | 11.703 | 12.043 |
| 97  | C25  | 1.205  | 12.084 | 11.795 |
| 98  | C26  | 2.065  | 12.237 | 13.05  |
| 99  | C27  | 1.615  | 13.316 | 14.038 |
| 100 | C28  | 1.58   | 14.715 | 13.424 |
| 101 | C29  | 1.343  | 15.785 | 14.49  |
| 102 | C30  | 1.28   | 17.178 | 13.859 |
| 103 | C31  | 1.143  | 18.267 | 14.933 |
| 104 | C32  | 1.319  | 19.741 | 14.463 |
| 105 | C33  | -0.635 | 4.271  | 13.708 |
| 106 | C34  | -0.221 | 4.193  | 8.736  |
| 107 | C35  | 0.242  | 2.854  | 9.33   |
| 108 | C36  | 1.552  | 2.97   | 10.111 |
| 109 | C37  | 1.099  | 3.134  | 15.203 |
| 110 | C38  | 2.671  | 1.901  | 16.828 |
| 111 | C39  | 1.855  | 1.643  | 10.81  |
| 112 | C40  | 4.02   | 2.427  | 16.33  |
| 113 | C41  | 5.157  | 1.5    | 16.767 |
| 114 | C42  | 2.952  | 1.745  | 11.864 |
| 115 | C43  | 5.378  | 1.81   | 12.422 |
| 116 | C44  | 6.831  | 1.84   | 11.963 |
| 117 | C45  | 4.36   | 1.898  | 11.287 |
| 118 | C46  | 1.513  | 2.889  | 16.658 |
| 119 | C47  | -0.156 | 4.014  | 15.145 |

|     |     |        |        |        |
|-----|-----|--------|--------|--------|
| 120 | C48 | 6.549  | 1.909  | 16.27  |
| 121 | C49 | 6.988  | 3.316  | 16.708 |
| 122 | C50 | 9.021  | 8.58   | 16.622 |
| 123 | C51 | 8.534  | 3.468  | 16.805 |
| 124 | C52 | 8.897  | 3.302  | 11.684 |
| 125 | C53 | 9.441  | 8.382  | 11.521 |
| 126 | C54 | 7.934  | 8.739  | 11.412 |
| 127 | C55 | 7.604  | 10.209 | 11.734 |
| 128 | C56 | 8.124  | 11.198 | 10.686 |
| 129 | C57 | 7.8    | 12.647 | 11.071 |
| 130 | C58 | 6.393  | 19.017 | 14.184 |
| 131 | C59 | 7.346  | 3.25   | 11.622 |
| 132 | C60 | -1.571 | 20.666 | 12.118 |
| 133 | O1  | 12.282 | 9.109  | 11.965 |
| 134 | O2  | 11.802 | 9.205  | 16.656 |
| 135 | O3  | 11.143 | 2.335  | 16.85  |
| 136 | O4  | 9.675  | 8.429  | 19.389 |
| 137 | O5  | 9.218  | 3.691  | 19.56  |
| 138 | O6  | 11.551 | 2.065  | 12.165 |
| 139 | O7  | 11.001 | 3.189  | 9.797  |
| 140 | O8  | 11.532 | 7.922  | 9.67   |
| 141 | O9  | -4.941 | 9.657  | 7.915  |
| 142 | O10 | -4.739 | 10.201 | 12.646 |
| 143 | O11 | -4.87  | 4.19   | 13.36  |
| 144 | O12 | -4.624 | 3.445  | 8.708  |
| 145 | O13 | -2.71  | 5.517  | 16.33  |
| 146 | O14 | -2.391 | 10.205 | 15.541 |
| 147 | O15 | -1.384 | 20.628 | 14.497 |
| 148 | O16 | -1.762 | 20.595 | 9.742  |
| 149 | O17 | 1.918  | 22.503 | 14.778 |
| 150 | O18 | 1.596  | 22.322 | 8.636  |
| 151 | O19 | 6.242  | 21.337 | 8.26   |
| 152 | O20 | 8.678  | 19.547 | 8.991  |
| 153 | O21 | 8.886  | 20.3   | 13.708 |
| 154 | O22 | 6.599  | 21.929 | 14.628 |
| 155 | O23 | -3.38  | 8.507  | 5.153  |
| 156 | O24 | -3.316 | 3.849  | 6.209  |
| 157 | C61 | -2.092 | 4.825  | 13.64  |
| 158 | C62 | 8.429  | 13.658 | 10.104 |
| 159 | C63 | 5.58   | 17.127 | 9.085  |
| 160 | C64 | 6.434  | 14.738 | 8.884  |
| 161 | C65 | 6.816  | 16.219 | 8.989  |
| 162 | C66 | 7.664  | 13.825 | 8.785  |
| 163 | H1  | 5.484  | 17.045 | 13.796 |
| 164 | H2  | 7.176  | 17.007 | 14.25  |
| 165 | H3  | 4.758  | 17.308 | 16.064 |
| 166 | H4  | 6.324  | 17.903 | 16.601 |
| 167 | H5  | 5.91   | 15.635 | 17.407 |
| 168 | H6  | 7.341  | 15.715 | 16.388 |
| 169 | H7  | 6.074  | 14.747 | 14.476 |
| 170 | H8  | 4.597  | 14.73  | 15.443 |
| 171 | H9  | 5.62   | 13.145 | 17.044 |
| 172 | H10 | 7.169  | 13.253 | 16.202 |
| 173 | H11 | 6.192  | 12.241 | 14.17  |
| 174 | H12 | 4.59   | 12.252 | 14.897 |
| 175 | H13 | 5.514  | 10.026 | 14.977 |
| 176 | H14 | 5.29   | 10.63  | 16.617 |
| 177 | H15 | 7.724  | 11.086 | 16.801 |
| 178 | H16 | 7.95   | 10.651 | 15.11  |
| 179 | H17 | 7.031  | 8.299  | 15.724 |
| 180 | H18 | 6.999  | 8.836  | 17.387 |
| 181 | H19 | 6.548  | 18.793 | 8.214  |
| 182 | H20 | -0.47  | 17.981 | 9.257  |

|     |     |        |        |        |
|-----|-----|--------|--------|--------|
| 183 | H21 | 1.174  | 17.512 | 9.622  |
| 184 | H22 | 0.317  | 20.257 | 8.619  |
| 185 | H23 | 1.823  | 17.982 | 7.227  |
| 186 | H24 | 0.215  | 18.627 | 6.922  |
| 187 | H25 | 0.279  | 16.431 | 6.013  |
| 188 | H26 | -0.783 | 16.382 | 7.416  |
| 189 | H27 | 1.075  | 15.385 | 8.78   |
| 190 | H28 | 2.152  | 15.489 | 7.386  |
| 191 | H29 | 0.616  | 13.958 | 6.108  |
| 192 | H30 | -0.446 | 13.875 | 7.518  |
| 193 | H31 | 1.721  | 10.744 | 7.774  |
| 194 | H32 | 1.169  | 11.381 | 6.23   |
| 195 | H33 | 2.497  | 13.031 | 7.469  |
| 196 | H34 | 1.437  | 12.909 | 8.865  |
| 197 | H35 | -1.093 | 11.673 | 7.052  |
| 198 | H36 | -0.596 | 11.4   | 8.723  |
| 199 | H37 | -0.032 | 9.037  | 8.209  |
| 200 | H38 | -0.314 | 9.318  | 6.504  |
| 201 | H39 | -2.666 | 9.89   | 6.942  |
| 202 | H40 | -2.387 | 10.768 | 13.251 |
| 203 | H41 | 0.12   | 9.554  | 12.03  |
| 204 | H42 | 0.03   | 10.272 | 13.624 |
| 205 | H43 | -0.731 | 12.438 | 12.703 |
| 206 | H44 | -0.779 | 11.779 | 11.085 |
| 207 | H45 | 1.231  | 13.019 | 11.225 |
| 208 | H46 | 1.66   | 11.325 | 11.147 |
| 209 | H47 | 3.093  | 12.455 | 12.735 |
| 210 | H48 | 2.105  | 11.283 | 13.58  |
| 211 | H49 | 2.312  | 13.311 | 14.885 |
| 212 | H50 | 0.631  | 13.066 | 14.451 |
| 213 | H51 | 0.785  | 14.773 | 12.672 |
| 214 | H52 | 2.529  | 14.916 | 12.912 |
| 215 | H53 | 2.156  | 15.75  | 15.226 |
| 216 | H54 | 0.409  | 15.58  | 15.025 |
| 217 | H55 | 0.419  | 17.217 | 13.182 |
| 218 | H56 | 2.171  | 17.334 | 13.245 |
| 219 | H57 | 1.833  | 18.068 | 15.763 |
| 220 | H58 | 0.134  | 18.166 | 15.359 |
| 221 | H59 | 0.851  | 20.311 | 15.279 |
| 222 | H60 | -0.594 | 3.316  | 13.167 |
| 223 | H61 | 0.067  | 4.95   | 13.209 |
| 224 | H62 | 0.13   | 5.036  | 9.341  |
| 225 | H63 | 0.266  | 4.312  | 7.758  |
| 226 | H64 | 0.355  | 2.121  | 8.521  |
| 227 | H65 | -0.525 | 2.449  | 10     |
| 228 | H66 | 1.46   | 3.765  | 10.86  |
| 229 | H67 | 2.371  | 3.246  | 9.437  |
| 230 | H68 | 0.896  | 2.174  | 14.714 |
| 231 | H69 | 1.911  | 3.613  | 14.651 |
| 232 | H70 | 2.754  | 1.671  | 17.898 |
| 233 | H71 | 2.431  | 0.958  | 16.322 |
| 234 | H72 | 2.11   | 0.878  | 10.068 |
| 235 | H73 | 0.948  | 1.294  | 11.32  |
| 236 | H74 | 4.192  | 3.43   | 16.733 |
| 237 | H75 | 4.006  | 2.502  | 15.238 |
| 238 | H76 | 4.951  | 0.484  | 16.408 |
| 239 | H77 | 5.178  | 1.445  | 17.863 |
| 240 | H78 | 2.915  | 0.831  | 12.47  |
| 241 | H79 | 2.738  | 2.578  | 12.545 |
| 242 | H80 | 5.219  | 0.866  | 12.958 |
| 243 | H81 | 5.2    | 2.612  | 13.148 |
| 244 | H82 | 6.975  | 1.176  | 11.102 |
| 245 | H83 | 7.427  | 1.41   | 12.776 |

|     |     |        |        |        |
|-----|-----|--------|--------|--------|
| 246 | H84 | 4.549  | 1.099  | 10.56  |
| 247 | H85 | 4.456  | 2.85   | 10.757 |
| 248 | H86 | 1.767  | 3.841  | 17.138 |
| 249 | H87 | 0.65   | 2.486  | 17.204 |
| 250 | H88 | 0.049  | 4.97   | 15.641 |
| 251 | H89 | -0.951 | 3.514  | 15.711 |
| 252 | H90 | 6.576  | 1.839  | 15.179 |
| 253 | H91 | 7.26   | 1.164  | 16.649 |
| 254 | H92 | 6.563  | 3.524  | 17.699 |
| 255 | H93 | 6.557  | 4.065  | 16.032 |
| 256 | H94 | 9.422  | 9.373  | 17.266 |
| 257 | H95 | 8.824  | 2.667  | 17.498 |
| 258 | H96 | 9.184  | 2.435  | 11.073 |
| 259 | H97 | 9.914  | 9.113  | 10.857 |
| 260 | H98 | 7.332  | 8.098  | 12.066 |
| 261 | H99 | 7.594  | 8.523  | 10.391 |
| 262 | H0  | 7.998  | 10.48  | 12.719 |
| 263 | H1  | 6.516  | 10.314 | 11.806 |
| 264 | H2  | 7.688  | 10.958 | 9.711  |
| 265 | H3  | 9.21   | 11.102 | 10.587 |
| 266 | H4  | 8.207  | 12.838 | 12.072 |
| 267 | H5  | 6.717  | 12.79  | 11.138 |
| 268 | H6  | 7.13   | 19.33  | 14.935 |
| 269 | H7  | 7.01   | 3.504  | 10.609 |
| 270 | H8  | 6.897  | 3.998  | 12.283 |
| 271 | H9  | -2.604 | 20.986 | 12.198 |
| 272 | H10 | 11.904 | 8.71   | 11.153 |
| 273 | H11 | 12.747 | 9.393  | 16.539 |
| 274 | H12 | 12.037 | 1.973  | 16.738 |
| 275 | H13 | 9.97   | 8.252  | 20.297 |
| 276 | H14 | 9.544  | 3.873  | 20.455 |
| 277 | H15 | 11.233 | 2.46   | 11.326 |
| 278 | H16 | 11.582 | 3.265  | 9.018  |
| 279 | H17 | 12.081 | 7.677  | 8.902  |
| 280 | H18 | -5.883 | 9.748  | 8.127  |
| 281 | H19 | -5.698 | 10.231 | 12.504 |
| 282 | H20 | -5.787 | 3.963  | 13.135 |
| 283 | H21 | -4.064 | 3.539  | 7.913  |
| 284 | H22 | -2.971 | 5.868  | 17.196 |
| 285 | H23 | -2.653 | 10.194 | 16.476 |
| 286 | H24 | -2.282 | 20.98  | 14.386 |
| 287 | H25 | -2.634 | 20.942 | 9.99   |
| 288 | H26 | 2.243  | 23.415 | 14.844 |
| 289 | H27 | 1.95   | 23.202 | 8.431  |
| 290 | H28 | 6.237  | 22.282 | 8.044  |
| 291 | H29 | 9.529  | 20.007 | 9.056  |
| 292 | H30 | 9.793  | 20.547 | 13.454 |
| 293 | H31 | 7.308  | 21.308 | 14.37  |
| 294 | H32 | -3.895 | 8.153  | 4.411  |
| 295 | H33 | -3.677 | 3.814  | 5.305  |
| 296 | H34 | -2.657 | 4.2    | 14.344 |
| 297 | H35 | 4.938  | 16.937 | 8.214  |
| 298 | H36 | 5.808  | 14.446 | 9.734  |
| 299 | H37 | 5.827  | 14.598 | 7.98   |
| 300 | H38 | 7.409  | 16.504 | 8.112  |
| 301 | H39 | 7.448  | 16.372 | 9.869  |
| 302 | H40 | 8.517  | 14.623 | 10.613 |
| 303 | H41 | 9.455  | 13.344 | 9.877  |
| 304 | H42 | 7.352  | 12.844 | 8.409  |
| 305 | H43 | 8.347  | 14.237 | 8.032  |
| 306 | H3  | 8.315  | 5.951  | 12.196 |
| 307 | H6  | 12.027 | 5.448  | 8.923  |
| 308 | H20 | 9.814  | 20.323 | 11.231 |

|     |      |        |        |        |
|-----|------|--------|--------|--------|
| 309 | H23  | 5.259  | 18.423 | 11.759 |
| 310 | H36  | 8.56   | 6.011  | 15.705 |
| 311 | H39  | 9.731  | 6.07   | 20.53  |
| 312 | H43  | 13.06  | 9.399  | 14.34  |
| 313 | H46  | 8.303  | 8.08   | 14     |
| 314 | H50  | 12.3   | 1.775  | 14.544 |
| 315 | H53  | 7.863  | 3.941  | 14.171 |
| 316 | H64  | -1.986 | 3.276  | 8.059  |
| 317 | H66  | -1.387 | 6.919  | 8.914  |
| 318 | H69  | -3.852 | 5.958  | 4.712  |
| 319 | H83  | 3.239  | 18.204 | 9.606  |
| 320 | H86  | 4.119  | 22.866 | 8.164  |
| 321 | H93  | 2.107  | 19.462 | 11.836 |
| 322 | H97  | 4.456  | 23.236 | 14.837 |
| 323 | CH00 | 3.729  | 18.389 | 14.168 |
| 324 | CH12 | -1.027 | 9.308  | 10.187 |
| 325 | CH15 | -5.929 | 10.053 | 10.312 |
| 326 | CH18 | -1.739 | 7.19   | 12.209 |
| 327 | CH21 | -2.765 | 8.05   | 16.991 |
| 328 | CH26 | -5.759 | 3.57   | 10.949 |
| 329 | CH29 | -1     | 4.908  | 11.13  |
| 330 | H1   | 5.001  | 16.839 | 9.971  |
| 331 | C1   | 5.187  | 6.963  | 8.48   |
| 332 | C2   | 4.98   | 6.2    | 9.624  |
| 333 | C3   | 4.665  | 11.124 | 8.475  |
| 334 | C4   | 5.086  | 10.477 | 7.325  |
| 335 | C5   | 5.241  | 9.094  | 7.335  |
| 336 | C6   | 4.983  | 8.345  | 8.496  |
| 337 | C7   | 4.536  | 8.981  | 9.683  |
| 338 | C8   | 4.384  | 10.389 | 9.629  |
| 339 | C9   | 3.974  | 6.544  | 13.181 |
| 340 | C10  | 3.668  | 7.912  | 13.248 |
| 341 | C11  | 3.836  | 8.706  | 12.098 |
| 342 | C12  | 4.297  | 8.186  | 10.861 |
| 343 | C13  | 4.55   | 6.794  | 10.813 |
| 344 | C14  | 4.391  | 6      | 11.96  |
| 345 | C15  | 3.218  | 8.45   | 14.467 |
| 346 | C16  | 3.098  | 7.654  | 15.605 |
| 347 | C17  | 3.861  | 5.755  | 14.335 |
| 348 | C18  | 3.428  | 6.307  | 15.54  |
| 349 | H1   | 4.552  | 12.205 | 8.482  |
| 350 | H2   | 5.3    | 11.045 | 6.424  |
| 351 | H3   | 5.581  | 8.603  | 6.426  |
| 352 | H4   | 4.064  | 10.953 | 10.501 |
| 353 | H5   | 3.61   | 9.765  | 12.187 |
| 354 | H6   | 4.605  | 4.935  | 11.907 |
| 355 | H7   | 5.169  | 5.13   | 9.574  |
| 356 | H8   | 5.528  | 6.464  | 7.575  |
| 357 | H9   | 2.97   | 9.504  | 14.548 |
| 358 | H10  | 3.345  | 5.687  | 16.427 |
| 359 | H11  | 4.112  | 4.698  | 14.3   |
| 360 | H12  | 2.755  | 8.088  | 16.54  |

**Table S7.** Cartesian coordinates of the structure of (biphenyl)<sub>2</sub>C<sub>1</sub> optimized by MacroModel Ver 9.1 using the MMFFs force field.

| Center Number | Atomic Number | Coordinates (Angstroms) |        |        |
|---------------|---------------|-------------------------|--------|--------|
|               |               | X                       | Y      | Z      |
| 1             | C1            | 10.049                  | 4.276  | 10.032 |
| 2             | C2            | 9.051                   | 4.393  | 11.013 |
| 3             | C02B          | 0.389                   | 19.951 | 13.205 |
| 4             | C3            | 8.621                   | 5.683  | 11.375 |
| 5             | C4            | 9.176                   | 6.831  | 10.782 |
| 6             | C5            | 10.163                  | 6.655  | 9.797  |
| 7             | C6            | 10.593                  | 5.391  | 9.404  |
| 8             | C18           | 6.787                   | 18.989 | 10.603 |
| 9             | C19           | 8.099                   | 19.481 | 10.528 |
| 10            | C20           | 8.782                   | 19.9   | 11.669 |
| 11            | C21           | 8.159                   | 19.795 | 12.91  |
| 12            | C22           | 6.889                   | 19.223 | 13.044 |
| 13            | C23           | 6.207                   | 18.839 | 11.875 |
| 14            | C35           | 9.347                   | 7.465  | 17.129 |
| 15            | C36           | 8.931                   | 6.214  | 16.629 |
| 16            | C37           | 9.118                   | 5.024  | 17.362 |
| 17            | C38           | 9.747                   | 5.111  | 18.614 |
| 18            | C39           | 10.184                  | 6.333  | 19.122 |
| 19            | C40           | 9.974                   | 7.496  | 18.384 |
| 20            | C41           | 9.719                   | 8.82   | 14.984 |
| 21            | C42           | 11.026                  | 9.308  | 14.848 |
| 22            | C43           | 11.623                  | 9.441  | 13.597 |
| 23            | C44           | 10.916                  | 9.089  | 12.451 |
| 24            | C45           | 9.604                   | 8.592  | 12.526 |
| 25            | C46           | 9.041                   | 8.43   | 13.81  |
| 26            | C48           | 9.28                    | 3.249  | 15.536 |
| 27            | C49           | 10.517                  | 2.589  | 15.565 |
| 28            | C50           | 11.134                  | 2.148  | 14.396 |
| 29            | C51           | 10.513                  | 2.348  | 13.167 |
| 30            | C52           | 9.268                   | 2.99   | 13.081 |
| 31            | C53           | 8.694                   | 3.474  | 14.277 |
| 32            | C64           | -1.767                  | 4.273  | 8.58   |
| 33            | C65           | -2.073                  | 5.438  | 7.644  |
| 34            | C66           | -1.73                   | 6.756  | 7.991  |
| 35            | C67           | -2.051                  | 7.841  | 7.153  |
| 36            | C68           | -2.66                   | 7.57   | 5.919  |
| 37            | C69           | -3.029                  | 6.274  | 5.562  |
| 38            | C70           | -2.762                  | 5.229  | 6.443  |
| 39            | C82           | 2.368                   | 20.095 | 9.234  |
| 40            | C83           | 3.464                   | 19.229 | 9.424  |
| 41            | C84           | 4.792                   | 19.631 | 9.183  |
| 42            | C85           | 5.001                   | 20.963 | 8.79   |
| 43            | C86           | 3.942                   | 21.861 | 8.65   |
| 44            | C87           | 2.639                   | 21.422 | 8.87   |
| 45            | C88           | 0.29                    | 19.917 | 10.745 |
| 46            | C89           | -1.057                  | 20.307 | 10.825 |
| 47            | C91           | -0.961                  | 20.333 | 13.228 |
| 48            | C93           | 0.998                   | 19.745 | 11.95  |
| 49            | C95           | 2.572                   | 20.268 | 14.545 |
| 50            | C96           | 2.78                    | 21.649 | 14.689 |
| 51            | C97           | 4.062                   | 22.189 | 14.771 |
| 52            | C98           | 5.171                   | 21.35  | 14.701 |
| 53            | C99           | 5.023                   | 19.962 | 14.548 |
| 54            | C100          | 3.713                   | 19.449 | 14.466 |
| 55            | C111          | -2.676                  | 9.976  | 11.328 |
| 56            | C112          | -1.971                  | 9.607  | 10.165 |

|     |      |        |        |        |
|-----|------|--------|--------|--------|
| 57  | C113 | -2.574 | 9.612  | 8.891  |
| 58  | C114 | -3.942 | 9.926  | 8.819  |
| 59  | C115 | -4.679 | 10.245 | 9.957  |
| 60  | C116 | -4.042 | 10.276 | 11.195 |
| 61  | C117 | -2.338 | 8.91   | 13.629 |
| 62  | C118 | -2.142 | 7.575  | 13.223 |
| 63  | C119 | -2.466 | 6.491  | 14.065 |
| 64  | C120 | -2.975 | 6.779  | 15.342 |
| 65  | C121 | -3.153 | 8.091  | 15.776 |
| 66  | C122 | -2.828 | 9.143  | 14.923 |
| 67  | C124 | -2.871 | 4.717  | 12.264 |
| 68  | C125 | -4.226 | 4.376  | 12.161 |
| 69  | C126 | -4.791 | 4.014  | 10.939 |
| 70  | C127 | -4.003 | 3.982  | 9.789  |
| 71  | C128 | -2.645 | 4.33   | 9.832  |
| 72  | C129 | -2.112 | 4.723  | 11.08  |
| 73  | C1   | 6.074  | 17.537 | 14.72  |
| 74  | C2   | 5.68   | 17.244 | 16.176 |
| 75  | C3   | 6.093  | 15.844 | 16.641 |
| 76  | C4   | 5.457  | 14.703 | 15.843 |
| 77  | C5   | 5.939  | 13.346 | 16.366 |
| 78  | C6   | 5.335  | 12.189 | 15.57  |
| 79  | C7   | 5.726  | 10.807 | 16.103 |
| 80  | C8   | 7.224  | 10.513 | 15.994 |
| 81  | C9   | 7.54   | 9.066  | 16.399 |
| 82  | C10  | 5.981  | 18.667 | 9.345  |
| 83  | C11  | 0.676  | 18.123 | 9.024  |
| 84  | C12  | 0.921  | 19.616 | 9.383  |
| 85  | C13  | 1.013  | 17.8   | 7.559  |
| 86  | C14  | 0.641  | 16.372 | 7.151  |
| 87  | C15  | 1.487  | 15.3   | 7.843  |
| 88  | C16  | 1.108  | 13.903 | 7.343  |
| 89  | C17  | 1.513  | 11.387 | 7.66   |
| 90  | C18  | 1.866  | 12.812 | 8.102  |
| 91  | C19  | 0.018  | 11.077 | 7.775  |
| 92  | C20  | -0.276 | 9.579  | 7.621  |
| 93  | C21  | -1.797 | 9.278  | 7.609  |
| 94  | C22  | -2.006 | 10.082 | 12.703 |
| 95  | C23  | -0.475 | 10.337 | 12.716 |
| 96  | C24  | -0.104 | 11.702 | 12.115 |
| 97  | C25  | 1.402  | 11.97  | 12.108 |
| 98  | C26  | 2.047  | 12.137 | 13.485 |
| 99  | C27  | 1.48   | 13.264 | 14.353 |
| 100 | C28  | 1.546  | 14.638 | 13.684 |
| 101 | C29  | 1.194  | 15.751 | 14.673 |
| 102 | C30  | 1.174  | 17.119 | 13.986 |
| 103 | C31  | 0.971  | 18.243 | 15.015 |
| 104 | C32  | 1.146  | 19.704 | 14.509 |
| 105 | C33  | -0.744 | 4.629  | 13.744 |
| 106 | C34  | -0.239 | 4.13   | 8.818  |
| 107 | C35  | 0.106  | 2.773  | 9.448  |
| 108 | C36  | 1.395  | 2.817  | 10.269 |
| 109 | C37  | 1.076  | 3.85   | 15.364 |
| 110 | C38  | 2.602  | 2.852  | 17.178 |
| 111 | C39  | 1.604  | 1.478  | 10.98  |
| 112 | C40  | 3.975  | 3.14   | 16.565 |
| 113 | C41  | 5.009  | 2.142  | 17.096 |
| 114 | C42  | 2.67   | 1.529  | 12.07  |
| 115 | C43  | 5.085  | 1.604  | 12.69  |
| 116 | C44  | 6.546  | 1.658  | 12.257 |
| 117 | C45  | 4.092  | 1.691  | 11.533 |
| 118 | C46  | 1.524  | 3.88   | 16.829 |
| 119 | C47  | -0.245 | 4.612  | 15.197 |

|     |     |        |        |        |
|-----|-----|--------|--------|--------|
| 120 | C48 | 6.425  | 2.32   | 16.538 |
| 121 | C49 | 7.044  | 3.69   | 16.848 |
| 122 | C50 | 9.062  | 8.76   | 16.366 |
| 123 | C51 | 8.601  | 3.683  | 16.836 |
| 124 | C52 | 8.548  | 3.15   | 11.741 |
| 125 | C53 | 8.815  | 8.238  | 11.265 |
| 126 | C54 | 7.284  | 8.498  | 11.314 |
| 127 | C55 | 6.867  | 9.94   | 11.673 |
| 128 | C56 | 7.537  | 11.026 | 10.828 |
| 129 | C57 | 7.144  | 12.434 | 11.289 |
| 130 | C58 | 6.239  | 19.051 | 14.417 |
| 131 | C59 | 7      | 3.056  | 11.805 |
| 132 | C60 | -1.683 | 20.522 | 12.052 |
| 133 | O1  | 11.59  | 9.276  | 11.274 |
| 134 | O2  | 11.725 | 9.676  | 15.965 |
| 135 | O3  | 11.126 | 2.362  | 16.769 |
| 136 | O4  | 10.356 | 8.699  | 18.913 |
| 137 | O5  | 9.904  | 3.98   | 19.367 |
| 138 | O6  | 11.193 | 1.87   | 12.08  |
| 139 | O7  | 10.553 | 3.029  | 9.753  |
| 140 | O8  | 10.776 | 7.767  | 9.272  |
| 141 | O9  | -4.562 | 9.928  | 7.599  |
| 142 | O10 | -4.758 | 10.624 | 12.309 |
| 143 | O11 | -5.003 | 4.382  | 13.287 |
| 144 | O12 | -4.647 | 3.581  | 8.648  |
| 145 | O13 | -3.28  | 5.747  | 16.188 |
| 146 | O14 | -2.97  | 10.432 | 15.362 |
| 147 | O15 | -1.584 | 20.498 | 14.436 |
| 148 | O16 | -1.778 | 20.448 | 9.669  |
| 149 | O17 | 1.696  | 22.482 | 14.765 |
| 150 | O18 | 1.596  | 22.293 | 8.711  |
| 151 | O19 | 6.274  | 21.389 | 8.526  |
| 152 | O20 | 8.714  | 19.557 | 9.308  |
| 153 | O21 | 8.762  | 20.309 | 14.028 |
| 154 | O22 | 6.386  | 21.977 | 14.791 |
| 155 | O23 | -2.912 | 8.602  | 5.057  |
| 156 | O24 | -3.239 | 3.971  | 6.177  |
| 157 | C61 | -2.242 | 5.044  | 13.625 |
| 158 | C62 | 7.979  | 13.52  | 10.596 |
| 159 | C63 | 5.594  | 17.163 | 9.276  |
| 160 | C64 | 6.379  | 14.768 | 9.036  |
| 161 | C65 | 6.808  | 16.227 | 9.236  |
| 162 | C66 | 7.561  | 13.799 | 9.148  |
| 163 | H1  | 5.352  | 17.067 | 14.041 |
| 164 | H2  | 7.037  | 17.047 | 14.518 |
| 165 | H3  | 4.599  | 17.366 | 16.306 |
| 166 | H4  | 6.163  | 17.969 | 16.843 |
| 167 | H5  | 5.82   | 15.738 | 17.698 |
| 168 | H6  | 7.186  | 15.76  | 16.591 |
| 169 | H7  | 5.718  | 14.791 | 14.782 |
| 170 | H8  | 4.365  | 14.766 | 15.917 |
| 171 | H9  | 5.67   | 13.243 | 17.424 |
| 172 | H10 | 7.032  | 13.311 | 16.304 |
| 173 | H11 | 5.625  | 12.27  | 14.516 |
| 174 | H12 | 4.243  | 12.266 | 15.607 |
| 175 | H13 | 5.171  | 10.054 | 15.534 |
| 176 | H14 | 5.406  | 10.712 | 17.148 |
| 177 | H15 | 7.782  | 11.194 | 16.647 |
| 178 | H16 | 7.558  | 10.703 | 14.97  |
| 179 | H17 | 6.974  | 8.367  | 15.772 |
| 180 | H18 | 7.169  | 8.914  | 17.423 |
| 181 | H19 | 6.606  | 18.831 | 8.457  |
| 182 | H20 | -0.384 | 17.885 | 9.185  |



|     |     |        |        |        |
|-----|-----|--------|--------|--------|
| 183 | H21 | 1.231  | 17.468 | 9.704  |
| 184 | H22 | 0.359  | 20.181 | 8.625  |
| 185 | H23 | 2.077  | 17.961 | 7.357  |
| 186 | H24 | 0.462  | 18.492 | 6.91   |
| 187 | H25 | 0.772  | 16.281 | 6.065  |
| 188 | H26 | -0.422 | 16.198 | 7.355  |
| 189 | H27 | 1.334  | 15.346 | 8.927  |
| 190 | H28 | 2.551  | 15.484 | 7.655  |
| 191 | H29 | 1.318  | 13.822 | 6.27   |
| 192 | H30 | 0.028  | 13.77  | 7.475  |
| 193 | H31 | 2.083  | 10.686 | 8.283  |
| 194 | H32 | 1.84   | 11.23  | 6.625  |
| 195 | H33 | 2.945  | 12.961 | 7.974  |
| 196 | H34 | 1.66   | 12.911 | 9.173  |
| 197 | H35 | -0.526 | 11.626 | 6.997  |
| 198 | H36 | -0.351 | 11.435 | 8.74   |
| 199 | H37 | 0.236  | 9.016  | 8.409  |
| 200 | H38 | 0.161  | 9.239  | 6.672  |
| 201 | H39 | -2.196 | 9.959  | 6.845  |
| 202 | H40 | -2.433 | 10.994 | 13.142 |
| 203 | H41 | 0.067  | 9.534  | 12.201 |
| 204 | H42 | -0.127 | 10.313 | 13.757 |
| 205 | H43 | -0.628 | 12.5   | 12.653 |
| 206 | H44 | -0.452 | 11.758 | 11.08  |
| 207 | H45 | 1.592  | 12.874 | 11.517 |
| 208 | H46 | 1.909  | 11.154 | 11.578 |
| 209 | H47 | 3.119  | 12.314 | 13.335 |
| 210 | H48 | 1.969  | 11.199 | 14.045 |
| 211 | H49 | 2.051  | 13.29  | 15.289 |
| 212 | H50 | 0.445  | 13.039 | 14.634 |
| 213 | H51 | 0.852  | 14.675 | 12.836 |
| 214 | H52 | 2.554  | 14.81  | 13.289 |
| 215 | H53 | 1.931  | 15.755 | 15.485 |
| 216 | H54 | 0.214  | 15.555 | 15.124 |
| 217 | H55 | 0.357  | 17.133 | 13.256 |
| 218 | H56 | 2.101  | 17.255 | 13.423 |
| 219 | H57 | 1.626  | 18.082 | 15.88  |
| 220 | H58 | -0.055 | 18.138 | 15.398 |
| 221 | H59 | 0.643  | 20.29  | 15.293 |
| 222 | H60 | -0.623 | 3.622  | 13.324 |
| 223 | H61 | -0.099 | 5.297  | 13.16  |
| 224 | H62 | 0.143  | 4.954  | 9.428  |
| 225 | H63 | 0.291  | 4.201  | 7.859  |
| 226 | H64 | 0.195  | 2.02   | 8.655  |
| 227 | H65 | -0.707 | 2.434  | 10.1   |
| 228 | H66 | 1.326  | 3.62   | 11.012 |
| 229 | H67 | 2.247  | 3.043  | 9.618  |
| 230 | H68 | 0.934  | 2.812  | 15.04  |
| 231 | H69 | 1.848  | 4.289  | 14.724 |
| 232 | H70 | 2.702  | 2.833  | 18.271 |
| 233 | H71 | 2.265  | 1.851  | 16.88  |
| 234 | H72 | 1.849  | 0.701  | 10.247 |
| 235 | H73 | 0.664  | 1.174  | 11.457 |
| 236 | H74 | 4.276  | 4.163  | 16.816 |
| 237 | H75 | 3.917  | 3.067  | 15.474 |
| 238 | H76 | 4.676  | 1.123  | 16.861 |
| 239 | H77 | 5.051  | 2.21   | 18.191 |
| 240 | H78 | 2.609  | 0.595  | 12.642 |
| 241 | H79 | 2.442  | 2.34   | 12.773 |
| 242 | H80 | 4.927  | 0.656  | 13.221 |
| 243 | H81 | 4.885  | 2.403  | 13.413 |
| 244 | H82 | 6.729  | 0.934  | 11.454 |
| 245 | H83 | 7.145  | 1.326  | 13.111 |

|     |     |        |        |        |
|-----|-----|--------|--------|--------|
| 246 | H84 | 4.304  | 0.899  | 10.804 |
| 247 | H85 | 4.196  | 2.648  | 11.014 |
| 248 | H86 | 1.87   | 4.888  | 17.088 |
| 249 | H87 | 0.658  | 3.674  | 17.471 |
| 250 | H88 | -0.118 | 5.641  | 15.555 |
| 251 | H89 | -0.999 | 4.137  | 15.835 |
| 252 | H90 | 6.41   | 2.154  | 15.456 |
| 253 | H91 | 7.05   | 1.528  | 16.969 |
| 254 | H92 | 6.715  | 4.004  | 17.849 |
| 255 | H93 | 6.643  | 4.438  | 16.153 |
| 256 | H94 | 9.503  | 9.59   | 16.933 |
| 257 | H95 | 8.857  | 2.904  | 17.567 |
| 258 | H96 | 8.808  | 2.271  | 11.135 |
| 259 | H97 | 9.145  | 8.93   | 10.481 |
| 260 | H98 | 6.793  | 7.819  | 12.02  |
| 261 | H99 | 6.861  | 8.259  | 10.329 |
| 262 | H0  | 7.073  | 10.125 | 12.732 |
| 263 | H1  | 5.78   | 10.023 | 11.559 |
| 264 | H2  | 7.274  | 10.88  | 9.775  |
| 265 | H3  | 8.626  | 10.943 | 10.906 |
| 266 | H4  | 7.322  | 12.511 | 12.369 |
| 267 | H5  | 6.073  | 12.602 | 11.131 |
| 268 | H6  | 6.941  | 19.389 | 15.191 |
| 269 | H7  | 6.584  | 3.253  | 10.809 |
| 270 | H8  | 6.582  | 3.822  | 12.465 |
| 271 | H9  | -2.727 | 20.81  | 12.091 |
| 272 | H10 | 11.184 | 8.739  | 10.561 |
| 273 | H11 | 12.619 | 9.95   | 15.705 |
| 274 | H12 | 11.985 | 1.937  | 16.616 |
| 275 | H13 | 10.855 | 8.548  | 19.732 |
| 276 | H14 | 10.443 | 4.183  | 20.147 |
| 277 | H15 | 10.865 | 2.297  | 11.26  |
| 278 | H16 | 11.092 | 3.089  | 8.942  |
| 279 | H17 | 11.273 | 7.496  | 8.478  |
| 280 | H18 | -5.507 | 10.112 | 7.715  |
| 281 | H19 | -5.692 | 10.734 | 12.073 |
| 282 | H20 | -5.916 | 4.16   | 13.043 |
| 283 | H21 | -4.072 | 3.692  | 7.866  |
| 284 | H22 | -3.69  | 6.101  | 16.994 |
| 285 | H23 | -3.387 | 10.429 | 16.239 |
| 286 | H24 | -2.488 | 20.822 | 14.29  |
| 287 | H25 | -2.669 | 20.768 | 9.883  |
| 288 | H26 | 2.005  | 23.401 | 14.814 |
| 289 | H27 | 1.941  | 23.179 | 8.52   |
| 290 | H28 | 6.264  | 22.336 | 8.315  |
| 291 | H29 | 9.566  | 20.01  | 9.404  |
| 292 | H30 | 9.678  | 20.551 | 13.806 |
| 293 | H31 | 7.113  | 21.357 | 14.591 |
| 294 | H32 | -3.421 | 8.274  | 4.298  |
| 295 | H33 | -3.563 | 3.949  | 5.259  |
| 296 | H34 | -2.763 | 4.379  | 14.327 |
| 297 | H35 | 4.991  | 16.991 | 8.374  |
| 298 | H36 | 5.596  | 14.497 | 9.754  |
| 299 | H37 | 5.939  | 14.67  | 8.036  |
| 300 | H38 | 7.477  | 16.522 | 8.418  |
| 301 | H39 | 7.375  | 16.326 | 10.166 |
| 302 | H40 | 7.922  | 14.438 | 11.191 |
| 303 | H41 | 9.034  | 13.218 | 10.607 |
| 304 | H42 | 7.304  | 12.862 | 8.642  |
| 305 | H43 | 8.417  | 14.218 | 8.604  |
| 306 | H3  | 7.889  | 5.796  | 12.172 |
| 307 | H6  | 11.385 | 5.281  | 8.672  |
| 308 | H20 | 9.778  | 20.322 | 11.587 |

|     |      |        |        |        |
|-----|------|--------|--------|--------|
| 309 | H23  | 5.197  | 18.445 | 11.956 |
| 310 | H36  | 8.432  | 6.168  | 15.665 |
| 311 | H39  | 10.657 | 6.381  | 20.097 |
| 312 | H43  | 12.633 | 9.826  | 13.492 |
| 313 | H46  | 8.038  | 8.02   | 13.894 |
| 314 | H50  | 12.093 | 1.638  | 14.422 |
| 315 | H53  | 7.753  | 4.012  | 14.233 |
| 316 | H64  | -2.029 | 3.333  | 8.076  |
| 317 | H66  | -1.246 | 6.945  | 8.946  |
| 318 | H69  | -3.544 | 6.088  | 4.627  |
| 319 | H83  | 3.27   | 18.212 | 9.748  |
| 320 | H86  | 4.13   | 22.887 | 8.353  |
| 321 | H93  | 2.036  | 19.423 | 11.916 |
| 322 | H97  | 4.219  | 23.256 | 14.89  |
| 323 | CH00 | 3.585  | 18.381 | 14.344 |
| 324 | CH12 | -0.923 | 9.339  | 10.249 |
| 325 | CH15 | -5.733 | 10.486 | 9.878  |
| 326 | CH18 | -1.737 | 7.379  | 12.234 |
| 327 | CH21 | -3.529 | 8.291  | 16.774 |
| 328 | CH26 | -5.839 | 3.739  | 10.862 |
| 329 | CH29 | -1.071 | 5.022  | 11.144 |
| 330 | H1   | 4.971  | 16.877 | 10.132 |
| 331 | C1   | 3.741  | 6.781  | 11.559 |
| 332 | C2   | 3.448  | 8.051  | 12.082 |
| 333 | C3   | 3.567  | 8.312  | 13.45  |
| 334 | C4   | 3.982  | 7.31   | 14.322 |
| 335 | C5   | 4.273  | 6.044  | 13.826 |
| 336 | C6   | 4.145  | 5.782  | 12.461 |
| 337 | C7   | 3.479  | 5.978  | 7.346  |
| 338 | C8   | 4.607  | 5.589  | 8.063  |
| 339 | C9   | 4.691  | 5.853  | 9.432  |
| 340 | C10  | 3.648  | 6.507  | 10.113 |
| 341 | C11  | 2.521  | 6.893  | 9.369  |
| 342 | C12  | 2.437  | 6.631  | 7.998  |
| 343 | H1   | 3.144  | 8.86   | 11.422 |
| 344 | H2   | 3.345  | 9.303  | 13.833 |
| 345 | H3   | 4.076  | 7.516  | 15.384 |
| 346 | H4   | 4.594  | 5.257  | 14.501 |
| 347 | H5   | 4.358  | 4.779  | 12.102 |
| 348 | H6   | 3.412  | 5.774  | 6.281  |
| 349 | H7   | 5.426  | 5.084  | 7.557  |
| 350 | H8   | 5.591  | 5.553  | 9.964  |
| 351 | H9   | 1.686  | 7.391  | 9.857  |
| 352 | H10  | 1.554  | 6.931  | 7.44   |

**Table S8.** Cartesian coordinates of the structure of (diphenylacetylene)<sub>c</sub>**1** optimized by MacroModel Ver 9.1 using the MMFFs force field.

| Center Number | Atomic Number | Coordinates (Angstroms) |        |        |
|---------------|---------------|-------------------------|--------|--------|
|               |               | X                       | Y      | Z      |
| 1             | C1            | 10.315                  | 4.127  | 9.637  |
| 2             | C2            | 9.314                   | 4.213  | 10.616 |
| 3             | C02B          | 0.383                   | 19.517 | 13.239 |
| 4             | C3            | 8.836                   | 5.489  | 10.973 |
| 5             | C4            | 9.338                   | 6.654  | 10.365 |
| 6             | C5            | 10.325                  | 6.508  | 9.375  |
| 7             | C6            | 10.81                   | 5.258  | 8.998  |
| 8             | C18           | 6.689                   | 18.735 | 10.357 |
| 9             | C19           | 8.038                   | 19.087 | 10.214 |
| 10            | C20           | 8.835                   | 19.349 | 11.325 |
| 11            | C21           | 8.292                   | 19.233 | 12.601 |
| 12            | C22           | 6.953                   | 18.876 | 12.799 |
| 13            | C23           | 6.166                   | 18.623 | 11.66  |
| 14            | C35           | 9.732                   | 7.29   | 16.654 |
| 15            | C36           | 9.27                    | 6.04   | 16.197 |
| 16            | C37           | 9.518                   | 4.849  | 16.913 |
| 17            | C38           | 10.258                  | 4.937  | 18.101 |
| 18            | C39           | 10.751                  | 6.156  | 18.561 |
| 19            | C40           | 10.478                  | 7.319  | 17.843 |
| 20            | C41           | 9.958                   | 8.69   | 14.515 |
| 21            | C42           | 11.219                  | 9.27   | 14.318 |
| 22            | C43           | 11.745                  | 9.445  | 13.041 |
| 23            | C44           | 11.009                  | 9.045  | 11.929 |
| 24            | C45           | 9.74                    | 8.46   | 12.064 |
| 25            | C46           | 9.252                   | 8.257  | 13.373 |
| 26            | C48           | 9.63                    | 3.048  | 15.119 |
| 27            | C49           | 10.848                  | 2.352  | 15.135 |
| 28            | C50           | 11.442                  | 1.899  | 13.958 |
| 29            | C51           | 10.815                  | 2.122  | 12.737 |
| 30            | C52           | 9.584                   | 2.79   | 12.666 |
| 31            | C53           | 9.037                   | 3.29   | 13.867 |
| 32            | C64           | -1.273                  | 4.19   | 8.095  |
| 33            | C65           | -1.55                   | 5.366  | 7.167  |
| 34            | C66           | -1.256                  | 6.682  | 7.561  |
| 35            | C67           | -1.566                  | 7.779  | 6.735  |
| 36            | C68           | -2.101                  | 7.525  | 5.463  |
| 37            | C69           | -2.41                   | 6.23   | 5.054  |
| 38            | C70           | -2.164                  | 5.17   | 5.922  |
| 39            | C82           | 2.2                     | 19.95  | 9.228  |
| 40            | C83           | 3.293                   | 19.064 | 9.332  |
| 41            | C84           | 4.619                   | 19.467 | 9.084  |
| 42            | C85           | 4.832                   | 20.819 | 8.773  |
| 43            | C86           | 3.779                   | 21.734 | 8.721  |
| 44            | C87           | 2.476                   | 21.294 | 8.946  |
| 45            | C88           | 0.168                   | 19.622 | 10.787 |
| 46            | C89           | -1.203                  | 19.876 | 10.952 |
| 47            | C91           | -0.993                  | 19.764 | 13.346 |
| 48            | C93           | 0.946                   | 19.441 | 11.947 |
| 49            | C95           | 2.635                   | 19.877 | 14.45  |
| 50            | C96           | 2.802                   | 21.269 | 14.528 |
| 51            | C97           | 4.067                   | 21.851 | 14.51  |
| 52            | C98           | 5.198                   | 21.045 | 14.404 |
| 53            | C99           | 5.095                   | 19.646 | 14.332 |
| 54            | C100          | 3.8                     | 19.091 | 14.354 |
| 55            | C111          | -2.298                  | 9.763  | 10.97  |
| 56            | C112          | -1.574                  | 9.455  | 9.8    |

|     |      |        |        |        |
|-----|------|--------|--------|--------|
| 57  | C113 | -2.171 | 9.475  | 8.523  |
| 58  | C114 | -3.55  | 9.733  | 8.453  |
| 59  | C115 | -4.304 | 9.991  | 9.596  |
| 60  | C116 | -3.674 | 10.015 | 10.838 |
| 61  | C117 | -1.961 | 8.668  | 13.257 |
| 62  | C118 | -1.759 | 7.343  | 12.822 |
| 63  | C119 | -2.077 | 6.24   | 13.639 |
| 64  | C120 | -2.579 | 6.497  | 14.925 |
| 65  | C121 | -2.76  | 7.798  | 15.39  |
| 66  | C122 | -2.446 | 8.87   | 14.558 |
| 67  | C124 | -2.458 | 4.539  | 11.768 |
| 68  | C125 | -3.82  | 4.245  | 11.618 |
| 69  | C126 | -4.363 | 3.943  | 10.37  |
| 70  | C127 | -3.546 | 3.925  | 9.241  |
| 71  | C128 | -2.18  | 4.232  | 9.329  |
| 72  | C129 | -1.668 | 4.564  | 10.603 |
| 73  | C1   | 6.228  | 17.26  | 14.552 |
| 74  | C2   | 5.914  | 16.99  | 16.03  |
| 75  | C3   | 6.347  | 15.59  | 16.484 |
| 76  | C4   | 5.648  | 14.447 | 15.742 |
| 77  | C5   | 6.19   | 13.087 | 16.198 |
| 78  | C6   | 5.527  | 11.937 | 15.438 |
| 79  | C7   | 5.979  | 10.547 | 15.893 |
| 80  | C8   | 7.469  | 10.286 | 15.665 |
| 81  | C9   | 7.844  | 8.843  | 16.029 |
| 82  | C10  | 5.797  | 18.479 | 9.143  |
| 83  | C11  | 0.506  | 18.011 | 8.888  |
| 84  | C12  | 0.754  | 19.465 | 9.38   |
| 85  | C13  | 0.814  | 17.817 | 7.394  |
| 86  | C14  | 0.558  | 16.387 | 6.913  |
| 87  | C15  | 1.56   | 15.373 | 7.472  |
| 88  | C16  | 1.235  | 13.959 | 6.984  |
| 89  | C17  | 1.825  | 11.472 | 7.235  |
| 90  | C18  | 2.125  | 12.914 | 7.661  |
| 91  | C19  | 0.361  | 11.076 | 7.444  |
| 92  | C20  | 0.131  | 9.572  | 7.257  |
| 93  | C21  | -1.376 | 9.21   | 7.237  |
| 94  | C22  | -1.637 | 9.857  | 12.351 |
| 95  | C23  | -0.107 | 10.111 | 12.376 |
| 96  | C24  | 0.274  | 11.474 | 11.782 |
| 97  | C25  | 1.784  | 11.721 | 11.761 |
| 98  | C26  | 2.45   | 11.823 | 13.135 |
| 99  | C27  | 1.856  | 12.877 | 14.075 |
| 100 | C28  | 1.856  | 14.285 | 13.478 |
| 101 | C29  | 1.464  | 15.33  | 14.522 |
| 102 | C30  | 1.338  | 16.718 | 13.89  |
| 103 | C31  | 1.125  | 17.794 | 14.965 |
| 104 | C32  | 1.225  | 19.272 | 14.493 |
| 105 | C33  | -0.369 | 4.375  | 13.298 |
| 106 | C34  | 0.248  | 4.032  | 8.363  |
| 107 | C35  | 0.56   | 2.657  | 8.974  |
| 108 | C36  | 1.795  | 2.676  | 9.871  |
| 109 | C37  | 1.43   | 3.554  | 14.921 |
| 110 | C38  | 2.956  | 2.51   | 16.708 |
| 111 | C39  | 1.939  | 1.33   | 10.585 |
| 112 | C40  | 4.333  | 2.918  | 16.173 |
| 113 | C41  | 5.392  | 1.929  | 16.676 |
| 114 | C42  | 2.996  | 1.338  | 11.683 |
| 115 | C43  | 5.417  | 1.335  | 12.3   |
| 116 | C44  | 6.875  | 1.422  | 11.863 |
| 117 | C45  | 4.421  | 1.487  | 11.153 |
| 118 | C46  | 1.827  | 3.494  | 16.399 |
| 119 | C47  | 0.084  | 4.272  | 14.762 |

|     |     |        |        |        |
|-----|-----|--------|--------|--------|
| 120 | C48 | 6.804  | 2.141  | 16.127 |
| 121 | C49 | 7.414  | 3.511  | 16.453 |
| 122 | C50 | 9.372  | 8.585  | 15.925 |
| 123 | C51 | 8.973  | 3.505  | 16.424 |
| 124 | C52 | 8.844  | 2.956  | 11.339 |
| 125 | C53 | 8.92   | 8.049  | 10.839 |
| 126 | C54 | 7.379  | 8.232  | 10.953 |
| 127 | C55 | 6.9    | 9.648  | 11.329 |
| 128 | C56 | 7.442  | 10.764 | 10.431 |
| 129 | C57 | 7.027  | 12.154 | 10.932 |
| 130 | C58 | 6.339  | 18.767 | 14.197 |
| 131 | C59 | 7.299  | 2.835  | 11.43  |
| 132 | C60 | -1.786 | 19.953 | 12.216 |
| 133 | O1  | 11.612 | 9.277  | 10.721 |
| 134 | O2  | 11.943 | 9.69   | 15.4   |
| 135 | O3  | 11.46  | 2.098  | 16.332 |
| 136 | O4  | 10.921 | 8.52   | 18.33  |
| 137 | O5  | 10.476 | 3.807  | 18.842 |
| 138 | O6  | 11.473 | 1.641  | 11.637 |
| 139 | O7  | 10.863 | 2.898  | 9.364  |
| 140 | O8  | 10.879 | 7.638  | 8.823  |
| 141 | O9  | -4.163 | 9.743  | 7.229  |
| 142 | O10 | -4.407 | 10.305 | 11.957 |
| 143 | O11 | -4.627 | 4.239  | 12.723 |
| 144 | O12 | -4.172 | 3.579  | 8.072  |
| 145 | O13 | -2.876 | 5.444  | 15.748 |
| 146 | O14 | -2.595 | 10.148 | 15.024 |
| 147 | O15 | -1.567 | 19.797 | 14.588 |
| 148 | O16 | -1.988 | 20.022 | 9.838  |
| 149 | O17 | 1.696  | 22.068 | 14.635 |
| 150 | O18 | 1.438  | 22.183 | 8.873  |
| 151 | O19 | 6.104  | 21.246 | 8.502  |
| 152 | O20 | 8.583  | 19.157 | 8.962  |
| 153 | O21 | 9.13   | 19.503 | 13.647 |
| 154 | O22 | 6.39   | 21.719 | 14.381 |
| 155 | O23 | -2.334 | 8.573  | 4.615  |
| 156 | O24 | -2.589 | 3.908  | 5.598  |
| 157 | C61 | -1.86  | 4.806  | 13.156 |
| 158 | C62 | 7.783  | 13.277 | 10.207 |
| 159 | C63 | 5.383  | 16.98  | 9.066  |
| 160 | C64 | 6.096  | 14.566 | 8.776  |
| 161 | C65 | 6.571  | 16.017 | 8.941  |
| 162 | C66 | 7.261  | 13.569 | 8.794  |
| 163 | H1  | 5.489  | 16.758 | 13.916 |
| 164 | H2  | 7.192  | 16.785 | 14.318 |
| 165 | H3  | 4.844  | 17.12  | 16.222 |
| 166 | H4  | 6.44   | 17.72  | 16.658 |
| 167 | H5  | 6.146  | 15.496 | 17.558 |
| 168 | H6  | 7.433  | 15.497 | 16.361 |
| 169 | H7  | 5.801  | 14.544 | 14.662 |
| 170 | H8  | 4.569  | 14.497 | 15.925 |
| 171 | H9  | 6.022  | 12.964 | 17.275 |
| 172 | H10 | 7.274  | 13.067 | 16.033 |
| 173 | H11 | 5.715  | 12.047 | 14.363 |
| 174 | H12 | 4.444  | 11.997 | 15.582 |
| 175 | H13 | 5.395  | 9.802  | 15.339 |
| 176 | H14 | 5.739  | 10.414 | 16.954 |
| 177 | H15 | 8.062  | 10.972 | 16.279 |
| 178 | H16 | 7.718  | 10.491 | 14.619 |
| 179 | H17 | 7.27   | 8.14   | 15.414 |
| 180 | H18 | 7.524  | 8.662  | 17.065 |
| 181 | H19 | 6.366  | 18.662 | 8.222  |
| 182 | H20 | -0.549 | 17.749 | 9.046  |

|     |     |        |        |        |
|-----|-----|--------|--------|--------|
| 183 | H21 | 1.073  | 17.303 | 9.502  |
| 184 | H22 | 0.164  | 20.102 | 8.706  |
| 185 | H23 | 1.848  | 18.089 | 7.162  |
| 186 | H24 | 0.173  | 18.495 | 6.816  |
| 187 | H25 | 0.617  | 16.375 | 5.817  |
| 188 | H26 | -0.464 | 16.09  | 7.177  |
| 189 | H27 | 1.538  | 15.383 | 8.567  |
| 190 | H28 | 2.577  | 15.645 | 7.166  |
| 191 | H29 | 1.356  | 13.903 | 5.896  |
| 192 | H30 | 0.183  | 13.753 | 7.208  |
| 193 | H31 | 2.474  | 10.802 | 7.812  |
| 194 | H32 | 2.089  | 11.34  | 6.179  |
| 195 | H33 | 3.177  | 13.132 | 7.44   |
| 196 | H34 | 2.011  | 12.991 | 8.749  |
| 197 | H35 | -0.264 | 11.62  | 6.725  |
| 198 | H36 | 0.042  | 11.382 | 8.444  |
| 199 | H37 | 0.668  | 9.01   | 8.029  |
| 200 | H38 | 0.579  | 9.273  | 6.299  |
| 201 | H39 | -1.805 | 9.894  | 6.493  |
| 202 | H40 | -2.073 | 10.76  | 12.8   |
| 203 | H41 | 0.436  | 9.307  | 11.865 |
| 204 | H42 | 0.231  | 10.087 | 13.419 |
| 205 | H43 | -0.235 | 12.273 | 12.333 |
| 206 | H44 | -0.085 | 11.55  | 10.752 |
| 207 | H45 | 1.977  | 12.643 | 11.202 |
| 208 | H46 | 2.272  | 10.92  | 11.193 |
| 209 | H47 | 3.513  | 12.046 | 12.98  |
| 210 | H48 | 2.417  | 10.847 | 13.634 |
| 211 | H49 | 2.437  | 12.878 | 15.003 |
| 212 | H50 | 0.835  | 12.596 | 14.359 |
| 213 | H51 | 1.156  | 14.335 | 12.637 |
| 214 | H52 | 2.854  | 14.521 | 13.087 |
| 215 | H53 | 2.222  | 15.348 | 15.314 |
| 216 | H54 | 0.511  | 15.056 | 14.991 |
| 217 | H55 | 0.486  | 16.711 | 13.198 |
| 218 | H56 | 2.226  | 16.925 | 13.287 |
| 219 | H57 | 1.82   | 17.636 | 15.8   |
| 220 | H58 | 0.122  | 17.633 | 15.384 |
| 221 | H59 | 0.752  | 19.831 | 15.315 |
| 222 | H60 | -0.239 | 3.39   | 12.828 |
| 223 | H61 | 0.295  | 5.071  | 12.77  |
| 224 | H62 | 0.628  | 4.845  | 8.992  |
| 225 | H63 | 0.8    | 4.114  | 7.417  |
| 226 | H64 | 0.699  | 1.928  | 8.165  |
| 227 | H65 | -0.291 | 2.295  | 9.562  |
| 228 | H66 | 1.696  | 3.474  | 10.618 |
| 229 | H67 | 2.685  | 2.893  | 9.271  |
| 230 | H68 | 1.344  | 2.537  | 14.519 |
| 231 | H69 | 2.206  | 4.071  | 14.344 |
| 232 | H70 | 3.021  | 2.412  | 17.8   |
| 233 | H71 | 2.69   | 1.518  | 16.322 |
| 234 | H72 | 2.16   | 0.542  | 9.854  |
| 235 | H73 | 0.981  | 1.066  | 11.052 |
| 236 | H74 | 4.576  | 3.93   | 16.514 |
| 237 | H75 | 4.32   | 2.932  | 15.079 |
| 238 | H76 | 5.08   | 0.91   | 16.412 |
| 239 | H77 | 5.429  | 1.968  | 17.772 |
| 240 | H78 | 2.915  | 0.396  | 12.239 |
| 241 | H79 | 2.782  | 2.143  | 12.397 |
| 242 | H80 | 5.262  | 0.36   | 12.779 |
| 243 | H81 | 5.218  | 2.095  | 13.064 |
| 244 | H82 | 7.066  | 0.714  | 11.047 |
| 245 | H83 | 7.485  | 1.087  | 12.709 |

|     |     |        |        |        |
|-----|-----|--------|--------|--------|
| 246 | H84 | 4.617  | 0.724  | 10.391 |
| 247 | H85 | 4.543  | 2.465  | 10.676 |
| 248 | H86 | 2.097  | 4.495  | 16.753 |
| 249 | H87 | 0.955  | 3.182  | 16.988 |
| 250 | H88 | 0.155  | 5.274  | 15.198 |
| 251 | H89 | -0.671 | 3.72   | 15.335 |
| 252 | H90 | 6.79   | 1.989  | 15.043 |
| 253 | H91 | 7.439  | 1.349  | 16.544 |
| 254 | H92 | 7.095  | 3.81   | 17.462 |
| 255 | H93 | 7.001  | 4.265  | 15.772 |
| 256 | H94 | 9.808  | 9.42   | 16.49  |
| 257 | H95 | 9.233  | 2.738  | 17.165 |
| 258 | H96 | 9.107  | 2.09   | 10.716 |
| 259 | H97 | 9.181  | 8.742  | 10.032 |
| 260 | H98 | 6.953  | 7.532  | 11.68  |
| 261 | H99 | 6.931  | 7.967  | 9.986  |
| 262 | H0  | 7.169  | 9.857  | 12.37  |
| 263 | H1  | 5.804  | 9.662  | 11.293 |
| 264 | H2  | 7.092  | 10.608 | 9.405  |
| 265 | H3  | 8.535  | 10.729 | 10.411 |
| 266 | H4  | 7.265  | 12.226 | 12.001 |
| 267 | H5  | 5.944  | 12.286 | 10.838 |
| 268 | H6  | 7.048  | 19.179 | 14.927 |
| 269 | H7  | 6.866  | 3.041  | 10.442 |
| 270 | H8  | 6.873  | 3.581  | 12.108 |
| 271 | H9  | -2.85  | 20.138 | 12.318 |
| 272 | H10 | 11.233 | 8.682  | 10.038 |
| 273 | H11 | 12.793 | 10.045 | 15.096 |
| 274 | H12 | 12.299 | 1.639  | 16.169 |
| 275 | H13 | 11.51  | 8.366  | 19.085 |
| 276 | H14 | 11.086 | 4.008  | 19.568 |
| 277 | H15 | 11.165 | 2.11   | 10.832 |
| 278 | H16 | 11.401 | 2.975  | 8.553  |
| 279 | H17 | 11.385 | 7.374  | 8.032  |
| 280 | H18 | -5.117 | 9.873  | 7.346  |
| 281 | H19 | -5.344 | 10.38  | 11.719 |
| 282 | H20 | -5.541 | 4.067  | 12.446 |
| 283 | H21 | -3.564 | 3.662  | 7.314  |
| 284 | H22 | -3.266 | 5.776  | 16.571 |
| 285 | H23 | -3.049 | 10.127 | 15.882 |
| 286 | H24 | -2.51  | 20.013 | 14.501 |
| 287 | H25 | -2.903 | 20.199 | 10.111 |
| 288 | H26 | 1.974  | 22.998 | 14.622 |
| 289 | H27 | 1.787  | 23.074 | 8.713  |
| 290 | H28 | 6.1    | 22.204 | 8.353  |
| 291 | H29 | 9.487  | 19.504 | 9.028  |
| 292 | H30 | 9.033  | 18.785 | 14.297 |
| 293 | H31 | 7.092  | 21.15  | 14.025 |
| 294 | H32 | -2.778 | 8.25   | 3.815  |
| 295 | H33 | -2.861 | 3.901  | 4.663  |
| 296 | H34 | -2.409 | 4.124  | 13.82  |
| 297 | H35 | 4.728  | 16.836 | 8.197  |
| 298 | H36 | 5.368  | 14.31  | 9.554  |
| 299 | H37 | 5.577  | 14.48  | 7.813  |
| 300 | H38 | 7.185  | 16.298 | 8.077  |
| 301 | H39 | 7.207  | 16.099 | 9.827  |
| 302 | H40 | 7.739  | 14.181 | 10.823 |
| 303 | H41 | 8.844  | 13.007 | 10.142 |
| 304 | H42 | 6.945  | 12.639 | 8.309  |
| 305 | H43 | 8.082  | 13.97  | 8.187  |
| 306 | H3  | 8.104  | 5.577  | 11.772 |
| 307 | H6  | 11.602 | 5.173  | 8.262  |
| 308 | H20 | 9.878  | 19.628 | 11.218 |



|     |      |        |        |        |
|-----|------|--------|--------|--------|
| 309 | H23  | 5.121  | 18.345 | 11.784 |
| 310 | H36  | 8.688  | 5.994  | 15.281 |
| 311 | H39  | 11.315 | 6.204  | 19.486 |
| 312 | H43  | 12.72  | 9.896  | 12.888 |
| 313 | H46  | 8.285  | 7.78   | 13.502 |
| 314 | H50  | 12.388 | 1.366  | 13.972 |
| 315 | H53  | 8.109  | 3.852  | 13.833 |
| 316 | H64  | -1.534 | 3.258  | 7.576  |
| 317 | H66  | -0.823 | 6.858  | 8.543  |
| 318 | H69  | -2.865 | 6.054  | 4.086  |
| 319 | H83  | 3.095  | 18.029 | 9.592  |
| 320 | H86  | 3.971  | 22.775 | 8.487  |
| 321 | H93  | 2.005  | 19.221 | 11.851 |
| 322 | H97  | 4.193  | 22.927 | 14.572 |
| 323 | CH00 | 3.702  | 18.014 | 14.297 |
| 324 | CH12 | -0.517 | 9.221  | 9.88   |
| 325 | CH15 | -5.367 | 10.192 | 9.517  |
| 326 | CH18 | -1.356 | 7.172  | 11.827 |
| 327 | CH21 | -3.133 | 7.974  | 16.393 |
| 328 | CH26 | -5.416 | 3.703  | 10.257 |
| 329 | CH29 | -0.62  | 4.829  | 10.703 |
| 330 | H1   | 4.804  | 16.691 | 9.952  |
| 331 | C1   | 3.137  | 7.68   | 10.174 |
| 332 | C2   | 3.653  | 6.788  | 11.116 |
| 333 | C3   | 4.458  | 5.723  | 10.702 |
| 334 | C4   | 4.755  | 5.558  | 9.348  |
| 335 | C5   | 4.242  | 6.453  | 8.408  |
| 336 | C6   | 3.433  | 7.513  | 8.82   |
| 337 | C7   | 3.188  | 7.15   | 13.678 |
| 338 | C8   | 3.384  | 6.979  | 12.506 |
| 339 | C9   | 2.581  | 7.812  | 17.8   |
| 340 | C10  | 1.566  | 8.107  | 16.89  |
| 341 | C11  | 1.764  | 7.885  | 15.527 |
| 342 | C12  | 2.98   | 7.368  | 15.075 |
| 343 | C13  | 3.995  | 7.068  | 15.987 |
| 344 | C14  | 3.795  | 7.292  | 17.35  |
| 345 | H1   | 2.514  | 8.514  | 10.486 |
| 346 | H2   | 4.864  | 5.026  | 11.429 |
| 347 | H3   | 5.388  | 4.737  | 9.026  |
| 348 | H4   | 4.476  | 6.33   | 7.355  |
| 349 | H5   | 3.04   | 8.211  | 8.087  |
| 350 | H6   | 2.427  | 7.986  | 18.861 |
| 351 | H7   | 0.62   | 8.509  | 17.242 |
| 352 | H8   | 0.964  | 8.112  | 14.826 |
| 353 | H9   | 4.943  | 6.663  | 15.646 |
| 354 | H10  | 4.584  | 7.059  | 18.059 |

**Table S9.** Cartesian coordinates of the structure of (octane)<sub>2</sub>C<sub>1</sub> optimized by MacroModel Ver 9.1 using the MMFFs force field.

| Center Number | Atomic Number | Coordinates (Angstroms) |        |        |
|---------------|---------------|-------------------------|--------|--------|
|               |               | X                       | Y      | Z      |
| 1             | C1            | 10.247                  | 4.338  | 9.827  |
| 2             | C2            | 9.248                   | 4.445  | 10.809 |
| 3             | C02B          | 0.274                   | 19.159 | 13.074 |
| 4             | C3            | 8.836                   | 5.732  | 11.201 |
| 5             | C4            | 9.405                   | 6.886  | 10.635 |
| 6             | C5            | 10.393                  | 6.721  | 9.649  |
| 7             | C6            | 10.807                  | 5.461  | 9.229  |
| 8             | C18           | 6.714                   | 18.92  | 10.443 |
| 9             | C19           | 8.043                   | 19.354 | 10.339 |
| 10            | C20           | 8.788                   | 19.668 | 11.473 |
| 11            | C21           | 8.215                   | 19.524 | 12.733 |
| 12            | C22           | 6.893                   | 19.092 | 12.891 |
| 13            | C23           | 6.16                    | 18.784 | 11.729 |
| 14            | C35           | 9.583                   | 7.353  | 16.99  |
| 15            | C36           | 9.146                   | 6.12   | 16.465 |
| 16            | C37           | 9.318                   | 4.911  | 17.172 |
| 17            | C38           | 9.949                   | 4.963  | 18.424 |
| 18            | C39           | 10.405                  | 6.166  | 18.957 |
| 19            | C40           | 10.212                  | 7.348  | 18.245 |
| 20            | C41           | 9.975                   | 8.757  | 14.877 |
| 21            | C42           | 11.284                  | 9.245  | 14.75  |
| 22            | C43           | 11.875                  | 9.414  | 13.501 |
| 23            | C44           | 11.16                   | 9.098  | 12.348 |
| 24            | C45           | 9.848                   | 8.603  | 12.414 |
| 25            | C46           | 9.292                   | 8.404  | 13.695 |
| 26            | C48           | 9.464                   | 3.182  | 15.301 |
| 27            | C49           | 10.692                  | 2.504  | 15.31  |
| 28            | C50           | 11.299                  | 2.084  | 14.129 |
| 29            | C51           | 10.677                  | 2.326  | 12.907 |
| 30            | C52           | 9.443                   | 2.989  | 12.84  |
| 31            | C53           | 8.879                   | 3.449  | 14.051 |
| 32            | C64           | -1.608                  | 4.065  | 8.127  |
| 33            | C65           | -1.984                  | 5.215  | 7.197  |
| 34            | C66           | -1.625                  | 6.539  | 7.496  |
| 35            | C67           | -2.007                  | 7.61   | 6.665  |
| 36            | C68           | -2.707                  | 7.318  | 5.485  |
| 37            | C69           | -3.09                   | 6.015  | 5.174  |
| 38            | C70           | -2.752                  | 4.985  | 6.047  |
| 39            | C82           | 2.18                    | 19.788 | 9.136  |
| 40            | C83           | 3.33                    | 18.985 | 9.277  |
| 41            | C84           | 4.632                   | 19.493 | 9.103  |
| 42            | C85           | 4.756                   | 20.862 | 8.821  |
| 43            | C86           | 3.64                    | 21.695 | 8.729  |
| 44            | C87           | 2.365                   | 21.154 | 8.885  |
| 45            | C88           | 0.131                   | 19.31  | 10.621 |
| 46            | C89           | -1.249                  | 19.534 | 10.748 |
| 47            | C91           | -1.109                  | 19.374 | 13.145 |
| 48            | C93           | 0.876                   | 19.119 | 11.8   |
| 49            | C95           | 2.439                   | 19.674 | 14.369 |
| 50            | C96           | 2.462                   | 21.075 | 14.467 |
| 51            | C97           | 3.66                    | 21.783 | 14.495 |
| 52            | C98           | 4.869                   | 21.096 | 14.423 |
| 53            | C99           | 4.91                    | 19.694 | 14.347 |
| 54            | C100          | 3.678                   | 19.009 | 14.314 |
| 55            | C111          | -2.292                  | 9.765  | 10.841 |
| 56            | C112          | -1.699                  | 9.354  | 9.632  |

|     |      |        |        |        |
|-----|------|--------|--------|--------|
| 57  | C113 | -2.383 | 9.421  | 8.401  |
| 58  | C114 | -3.723 | 9.837  | 8.42   |
| 59  | C115 | -4.353 | 10.208 | 9.605  |
| 60  | C116 | -3.633 | 10.181 | 10.798 |
| 61  | C117 | -1.939 | 8.664  | 13.117 |
| 62  | C118 | -1.812 | 7.314  | 12.735 |
| 63  | C119 | -2.194 | 6.264  | 13.593 |
| 64  | C120 | -2.706 | 6.601  | 14.857 |
| 65  | C121 | -2.823 | 7.928  | 15.266 |
| 66  | C122 | -2.43  | 8.946  | 14.401 |
| 67  | C124 | -2.649 | 4.451  | 11.84  |
| 68  | C125 | -3.995 | 4.068  | 11.762 |
| 69  | C126 | -4.57  | 3.686  | 10.551 |
| 70  | C127 | -3.804 | 3.683  | 9.386  |
| 71  | C128 | -2.458 | 4.083  | 9.401  |
| 72  | C129 | -1.912 | 4.484  | 10.641 |
| 73  | C1   | 6.27   | 17.447 | 14.653 |
| 74  | C2   | 5.919  | 17.172 | 16.121 |
| 75  | C3   | 6.359  | 15.778 | 16.586 |
| 76  | C4   | 5.736  | 14.634 | 15.782 |
| 77  | C5   | 6.213  | 13.272 | 16.296 |
| 78  | C6   | 5.642  | 12.138 | 15.444 |
| 79  | C7   | 6.002  | 10.739 | 15.946 |
| 80  | C8   | 7.502  | 10.449 | 15.91  |
| 81  | C9   | 7.798  | 8.99   | 16.288 |
| 82  | C10  | 5.879  | 18.598 | 9.204  |
| 83  | C11  | 0.628  | 17.734 | 8.731  |
| 84  | C12  | 0.769  | 19.199 | 9.233  |
| 85  | C13  | 1.007  | 17.561 | 7.252  |
| 86  | C14  | 0.7    | 16.162 | 6.711  |
| 87  | C15  | 1.552  | 15.061 | 7.348  |
| 88  | C16  | 1.199  | 13.691 | 6.761  |
| 89  | C17  | 1.6    | 11.163 | 6.972  |
| 90  | C18  | 1.962  | 12.569 | 7.469  |
| 91  | C19  | 0.109  | 10.849 | 7.119  |
| 92  | C20  | -0.193 | 9.352  | 6.97   |
| 93  | C21  | -1.712 | 9.054  | 7.07   |
| 94  | C22  | -1.528 | 9.794  | 12.17  |
| 95  | C23  | 0.022  | 9.863  | 12.098 |
| 96  | C24  | 0.527  | 11.164 | 11.457 |
| 97  | C25  | 2.044  | 11.348 | 11.553 |
| 98  | C26  | 2.605  | 11.485 | 12.972 |
| 99  | C27  | 1.935  | 12.548 | 13.849 |
| 100 | C28  | 2.018  | 13.963 | 13.271 |
| 101 | C29  | 1.522  | 14.995 | 14.285 |
| 102 | C30  | 1.456  | 16.402 | 13.682 |
| 103 | C31  | 1.104  | 17.436 | 14.764 |
| 104 | C32  | 1.095  | 18.933 | 14.345 |
| 105 | C33  | -0.525 | 4.349  | 13.329 |
| 106 | C34  | -0.07  | 3.982  | 8.33   |
| 107 | C35  | 0.34   | 2.638  | 8.952  |
| 108 | C36  | 1.565  | 2.759  | 9.857  |
| 109 | C37  | 1.27   | 3.603  | 15.002 |
| 110 | C38  | 2.781  | 2.671  | 16.863 |
| 111 | C39  | 1.812  | 1.435  | 10.58  |
| 112 | C40  | 4.162  | 3.006  | 16.293 |
| 113 | C41  | 5.206  | 2.022  | 16.831 |
| 114 | C42  | 2.829  | 1.544  | 11.711 |
| 115 | C43  | 5.221  | 1.701  | 12.41  |
| 116 | C44  | 6.691  | 1.742  | 12.009 |
| 117 | C45  | 4.259  | 1.784  | 11.227 |
| 118 | C46  | 1.68   | 3.66   | 16.478 |
| 119 | C47  | -0.042 | 4.368  | 14.789 |

|     |     |        |        |        |
|-----|-----|--------|--------|--------|
| 120 | C48 | 6.623  | 2.224  | 16.288 |
| 121 | C49 | 7.233  | 3.592  | 16.63  |
| 122 | C50 | 9.317  | 8.669  | 16.258 |
| 123 | C51 | 8.791  | 3.587  | 16.614 |
| 124 | C52 | 8.721  | 3.197  | 11.507 |
| 125 | C53 | 9.052  | 8.284  | 11.148 |
| 126 | C54 | 7.52   | 8.542  | 11.213 |
| 127 | C55 | 7.104  | 9.979  | 11.586 |
| 128 | C56 | 7.732  | 11.064 | 10.707 |
| 129 | C57 | 7.331  | 12.473 | 11.159 |
| 130 | C58 | 6.243  | 18.949 | 14.269 |
| 131 | C59 | 7.171  | 3.136  | 11.574 |
| 132 | C60 | -1.872 | 19.571 | 11.995 |
| 133 | O1  | 11.829 | 9.317  | 11.173 |
| 134 | O2  | 11.988 | 9.578  | 15.874 |
| 135 | O3  | 11.301 | 2.238  | 16.506 |
| 136 | O4  | 10.615 | 8.534  | 18.798 |
| 137 | O5  | 10.092 | 3.813  | 19.152 |
| 138 | O6  | 11.347 | 1.864  | 11.806 |
| 139 | O7  | 10.732 | 3.091  | 9.518  |
| 140 | O8  | 11.018 | 7.838  | 9.15   |
| 141 | O9  | -4.422 | 9.892  | 7.244  |
| 142 | O10 | -4.242 | 10.585 | 11.955 |
| 143 | O11 | -4.753 | 4.052  | 12.901 |
| 144 | O12 | -4.459 | 3.253  | 8.263  |
| 145 | O13 | -3.07  | 5.602  | 15.719 |
| 146 | O14 | -2.503 | 10.248 | 14.819 |
| 147 | O15 | -1.721 | 19.373 | 14.369 |
| 148 | O16 | -2.002 | 19.693 | 9.614  |
| 149 | O17 | 1.279  | 21.758 | 14.546 |
| 150 | O18 | 1.268  | 21.964 | 8.777  |
| 151 | O19 | 6.003  | 21.39  | 8.622  |
| 152 | O20 | 8.622  | 19.452 | 9.104  |
| 153 | O21 | 9.009  | 19.84  | 13.8   |
| 154 | O22 | 5.988  | 21.884 | 14.437 |
| 155 | O23 | -3.03  | 8.336  | 4.629  |
| 156 | O24 | -3.229 | 3.717  | 5.827  |
| 157 | C61 | -2.012 | 4.8    | 13.192 |
| 158 | C62 | 8.135  | 13.561 | 10.432 |
| 159 | C63 | 5.578  | 17.073 | 9.12   |
| 160 | C64 | 6.472  | 14.719 | 8.864  |
| 161 | C65 | 6.835  | 16.198 | 9.051  |
| 162 | C66 | 7.695  | 13.804 | 8.982  |
| 163 | H1  | 5.612  | 16.866 | 13.994 |
| 164 | H2  | 7.284  | 17.064 | 14.472 |
| 165 | H3  | 4.842  | 17.282 | 16.283 |
| 166 | H4  | 6.414  | 17.912 | 16.762 |
| 167 | H5  | 6.092  | 15.665 | 17.644 |
| 168 | H6  | 7.453  | 15.711 | 16.529 |
| 169 | H7  | 6.007  | 14.725 | 14.724 |
| 170 | H8  | 4.643  | 14.693 | 15.845 |
| 171 | H9  | 5.906  | 13.143 | 17.34  |
| 172 | H10 | 7.308  | 13.244 | 16.27  |
| 173 | H11 | 5.976  | 12.25  | 14.405 |
| 174 | H12 | 4.551  | 12.22  | 15.435 |
| 175 | H13 | 5.481  | 10.012 | 15.311 |
| 176 | H14 | 5.621  | 10.603 | 16.965 |
| 177 | H15 | 8.025  | 11.108 | 16.611 |
| 178 | H16 | 7.889  | 10.671 | 14.911 |
| 179 | H17 | 7.232  | 8.31   | 15.641 |
| 180 | H18 | 7.416  | 8.821  | 17.305 |
| 181 | H19 | 6.461  | 18.822 | 8.299  |
| 182 | H20 | -0.416 | 17.414 | 8.85   |

|     |     |        |        |        |
|-----|-----|--------|--------|--------|
| 183 | H21 | 1.215  | 17.057 | 9.362  |
| 184 | H22 | 0.16   | 19.797 | 8.54   |
| 185 | H23 | 2.069  | 17.778 | 7.093  |
| 186 | H24 | 0.443  | 18.288 | 6.654  |
| 187 | H25 | 0.873  | 16.165 | 5.628  |
| 188 | H26 | -0.365 | 15.941 | 6.859  |
| 189 | H27 | 1.385  | 15.035 | 8.43   |
| 190 | H28 | 2.615  | 15.272 | 7.187  |
| 191 | H29 | 1.427  | 13.673 | 5.689  |
| 192 | H30 | 0.12   | 13.537 | 6.868  |
| 193 | H31 | 2.188  | 10.439 | 7.548  |
| 194 | H32 | 1.896  | 11.052 | 5.923  |
| 195 | H33 | 3.04   | 12.721 | 7.336  |
| 196 | H34 | 1.768  | 12.623 | 8.547  |
| 197 | H35 | -0.454 | 11.401 | 6.357  |
| 198 | H36 | -0.238 | 11.207 | 8.093  |
| 199 | H37 | 0.373  | 8.779  | 7.711  |
| 200 | H38 | 0.173  | 9.021  | 5.988  |
| 201 | H39 | -2.159 | 9.721  | 6.322  |
| 202 | H40 | -1.817 | 10.75  | 12.629 |
| 203 | H41 | 0.439  | 8.998  | 11.568 |
| 204 | H42 | 0.411  | 9.803  | 13.122 |
| 205 | H43 | 0.018  | 12.025 | 11.904 |
| 206 | H44 | 0.261  | 11.178 | 10.396 |
| 207 | H45 | 2.321  | 12.24  | 10.978 |
| 208 | H46 | 2.542  | 10.504 | 11.06  |
| 209 | H47 | 3.676  | 11.708 | 12.897 |
| 210 | H48 | 2.537  | 10.519 | 13.485 |
| 211 | H49 | 2.415  | 12.532 | 14.834 |
| 212 | H50 | 0.886  | 12.283 | 14.028 |
| 213 | H51 | 1.417  | 14.03  | 12.357 |
| 214 | H52 | 3.055  | 14.193 | 12.997 |
| 215 | H53 | 2.192  | 14.994 | 15.153 |
| 216 | H54 | 0.526  | 14.712 | 14.647 |
| 217 | H55 | 0.692  | 16.406 | 12.896 |
| 218 | H56 | 2.408  | 16.638 | 13.199 |
| 219 | H57 | 1.769  | 17.309 | 15.629 |
| 220 | H58 | 0.097  | 17.183 | 15.128 |
| 221 | H59 | 0.552  | 19.415 | 15.173 |
| 222 | H60 | -0.429 | 3.326  | 12.941 |
| 223 | H61 | 0.14   | 4.981  | 12.727 |
| 224 | H62 | 0.297  | 4.825  | 8.927  |
| 225 | H63 | 0.435  | 4.073  | 7.359  |
| 226 | H64 | 0.541  | 1.917  | 8.149  |
| 227 | H65 | -0.484 | 2.217  | 9.537  |
| 228 | H66 | 1.397  | 3.55   | 10.598 |
| 229 | H67 | 2.441  | 3.046  | 9.265  |
| 230 | H68 | 1.134  | 2.559  | 14.695 |
| 231 | H69 | 2.061  | 4.029  | 14.376 |
| 232 | H70 | 2.849  | 2.656  | 17.958 |
| 233 | H71 | 2.489  | 1.659  | 16.555 |
| 234 | H72 | 2.127  | 0.67   | 9.86   |
| 235 | H73 | 0.87   | 1.083  | 11.019 |
| 236 | H74 | 4.435  | 4.028  | 16.574 |
| 237 | H75 | 4.136  | 2.959  | 15.2   |
| 238 | H76 | 4.892  | 1      | 16.584 |
| 239 | H77 | 5.233  | 2.083  | 17.926 |
| 240 | H78 | 2.797  | 0.606  | 12.281 |
| 241 | H79 | 2.533  | 2.34   | 12.403 |
| 242 | H80 | 5.047  | 0.759  | 12.945 |
| 243 | H81 | 5.007  | 2.509  | 13.119 |
| 244 | H82 | 6.883  | 1.018  | 11.207 |
| 245 | H83 | 7.268  | 1.398  | 12.874 |

|     |     |        |        |        |
|-----|-----|--------|--------|--------|
| 246 | H84 | 4.526  | 1.029  | 10.479 |
| 247 | H85 | 4.338  | 2.766  | 10.747 |
| 248 | H86 | 1.983  | 4.68   | 16.74  |
| 249 | H87 | 0.803  | 3.428  | 17.098 |
| 250 | H88 | 0.088  | 5.405  | 15.12  |
| 251 | H89 | -0.809 | 3.917  | 15.429 |
| 252 | H90 | 6.617  | 2.079  | 15.203 |
| 253 | H91 | 7.251  | 1.428  | 16.707 |
| 254 | H92 | 6.905  | 3.881  | 17.638 |
| 255 | H93 | 6.828  | 4.354  | 15.953 |
| 256 | H94 | 9.764  | 9.481  | 16.845 |
| 257 | H95 | 9.048  | 2.79   | 17.325 |
| 258 | H96 | 8.962  | 2.328  | 10.879 |
| 259 | H97 | 9.381  | 8.991  | 10.378 |
| 260 | H98 | 7.033  | 7.857  | 11.917 |
| 261 | H99 | 7.087  | 8.308  | 10.23  |
| 262 | H0  | 7.354  | 10.172 | 12.634 |
| 263 | H1  | 6.011  | 10.049 | 11.517 |
| 264 | H2  | 7.438  | 10.9   | 9.664  |
| 265 | H3  | 8.823  | 10.997 | 10.753 |
| 266 | H4  | 7.535  | 12.567 | 12.233 |
| 267 | H5  | 6.255  | 12.624 | 11.026 |
| 268 | H6  | 6.88   | 19.445 | 15.013 |
| 269 | H7  | 6.757  | 3.355  | 10.581 |
| 270 | H8  | 6.765  | 3.902  | 12.244 |
| 271 | H9  | -2.942 | 19.732 | 12.068 |
| 272 | H10 | 11.425 | 8.79   | 10.45  |
| 273 | H11 | 12.882 | 9.854  | 15.619 |
| 274 | H12 | 12.153 | 1.804  | 16.34  |
| 275 | H13 | 11.112 | 8.358  | 19.613 |
| 276 | H14 | 10.635 | 3.992  | 19.936 |
| 277 | H15 | 11.023 | 2.315  | 10.998 |
| 278 | H16 | 11.267 | 3.163  | 8.706  |
| 279 | H17 | 11.516 | 7.579  | 8.352  |
| 280 | H18 | -5.341 | 10.146 | 7.424  |
| 281 | H19 | -5.176 | 10.781 | 11.78  |
| 282 | H20 | -5.664 | 3.805  | 12.672 |
| 283 | H21 | -3.911 | 3.389  | 7.463  |
| 284 | H22 | -3.474 | 5.991  | 16.512 |
| 285 | H23 | -2.939 | 10.284 | 15.685 |
| 286 | H24 | -2.66  | 19.594 | 14.26  |
| 287 | H25 | -2.92  | 19.884 | 9.863  |
| 288 | H26 | 1.461  | 22.712 | 14.552 |
| 289 | H27 | 1.556  | 22.883 | 8.655  |
| 290 | H28 | 5.934  | 22.348 | 8.488  |
| 291 | H29 | 9.504  | 19.847 | 9.198  |
| 292 | H30 | 8.893  | 19.152 | 14.477 |
| 293 | H31 | 6.743  | 21.398 | 14.066 |
| 294 | H32 | -3.586 | 7.993  | 3.912  |
| 295 | H33 | -3.6   | 3.679  | 4.927  |
| 296 | H34 | -2.548 | 4.171  | 13.914 |
| 297 | H35 | 4.971  | 16.878 | 8.226  |
| 298 | H36 | 5.703  | 14.419 | 9.586  |
| 299 | H37 | 6.034  | 14.594 | 7.866  |
| 300 | H38 | 7.47   | 16.524 | 8.219  |
| 301 | H39 | 7.418  | 16.323 | 9.969  |
| 302 | H40 | 8.067  | 14.489 | 11.009 |
| 303 | H41 | 9.195  | 13.28  | 10.434 |
| 304 | H42 | 7.478  | 12.85  | 8.49   |
| 305 | H43 | 8.529  | 14.253 | 8.429  |
| 306 | H3  | 8.104  | 5.834  | 11.998 |
| 307 | H6  | 11.6   | 5.358  | 8.495  |
| 308 | H20 | 9.816  | 20.007 | 11.397 |

|     |      |        |        |        |
|-----|------|--------|--------|--------|
| 309 | H23  | 5.131  | 18.44  | 11.821 |
| 310 | H36  | 8.644  | 6.102  | 15.501 |
| 311 | H39  | 10.88  | 6.187  | 19.932 |
| 312 | H43  | 12.885 | 9.798  | 13.402 |
| 313 | H46  | 8.289  | 7.993  | 13.772 |
| 314 | H50  | 12.25  | 1.56   | 14.138 |
| 315 | H53  | 7.944  | 4      | 14.024 |
| 316 | H64  | -1.842 | 3.116  | 7.624  |
| 317 | H66  | -1.072 | 6.744  | 8.41   |
| 318 | H69  | -3.67  | 5.812  | 4.281  |
| 319 | H83  | 3.197  | 17.934 | 9.513  |
| 320 | H86  | 3.763  | 22.752 | 8.519  |
| 321 | H93  | 1.943  | 18.924 | 11.734 |
| 322 | H97  | 3.675  | 22.866 | 14.567 |
| 323 | CH00 | 3.69   | 17.928 | 14.246 |
| 324 | CH12 | -0.672 | 9.001  | 9.642  |
| 325 | CH15 | -5.387 | 10.535 | 9.597  |
| 326 | CH18 | -1.406 | 7.084  | 11.753 |
| 327 | CH21 | -3.199 | 8.165  | 16.255 |
| 328 | CH26 | -5.608 | 3.375  | 10.494 |
| 329 | CH29 | -0.88  | 4.815  | 10.689 |
| 330 | H1   | 4.985  | 16.748 | 9.984  |
| 331 | C1   | 2.932  | 7.775  | 9.035  |
| 332 | C2   | 3.17   | 6.592  | 9.959  |
| 333 | C3   | 3.583  | 7.053  | 11.356 |
| 334 | C4   | 3.826  | 5.86   | 12.281 |
| 335 | C5   | 4.331  | 6.257  | 13.671 |
| 336 | C6   | 3.342  | 7.13   | 14.447 |
| 337 | C7   | 3.793  | 7.336  | 15.892 |
| 338 | C8   | 2.845  | 8.259  | 16.642 |
| 339 | H2   | 2.629  | 7.427  | 8.043  |
| 340 | H3   | 2.14   | 8.422  | 9.426  |
| 341 | H4   | 3.84   | 8.376  | 8.924  |
| 342 | H5   | 3.947  | 5.95   | 9.53   |
| 343 | H6   | 2.252  | 5.996  | 10.022 |
| 344 | H7   | 2.794  | 7.693  | 11.766 |
| 345 | H8   | 4.493  | 7.66   | 11.29  |
| 346 | H9   | 4.569  | 5.195  | 11.824 |
| 347 | H10  | 2.902  | 5.278  | 12.38  |
| 348 | H11  | 5.29   | 6.782  | 13.579 |
| 349 | H12  | 4.53   | 5.339  | 14.237 |
| 350 | H13  | 2.349  | 6.666  | 14.437 |
| 351 | H14  | 3.249  | 8.106  | 13.959 |
| 352 | H15  | 3.84   | 6.373  | 16.41  |
| 353 | H16  | 4.802  | 7.761  | 15.913 |
| 354 | H17  | 2.801  | 9.245  | 16.168 |
| 355 | H18  | 1.832  | 7.843  | 16.666 |
| 356 | H19  | 3.183  | 8.392  | 17.674 |

**Table S10.** Cartesian coordinates of the structure of (decane)<sub>c</sub>1 optimized by MacroModel Ver 9.1 using the MMFFs force field.

| Center Number | Atomic Number | Coordinates (Angstroms) |        |        |
|---------------|---------------|-------------------------|--------|--------|
|               |               | X                       | Y      | Z      |
| 1             | C1            | 10.255                  | 4.341  | 9.834  |
| 2             | C2            | 9.255                   | 4.445  | 10.813 |
| 3             | C02B          | 0.287                   | 19.187 | 13.092 |
| 4             | C3            | 8.837                   | 5.731  | 11.204 |
| 5             | C4            | 9.404                   | 6.887  | 10.638 |
| 6             | C5            | 10.394                  | 6.724  | 9.654  |
| 7             | C6            | 10.814                  | 5.465  | 9.235  |
| 8             | C18           | 6.716                   | 18.919 | 10.433 |
| 9             | C19           | 8.047                   | 19.345 | 10.323 |
| 10            | C20           | 8.799                   | 19.655 | 11.454 |
| 11            | C21           | 8.23                    | 19.517 | 12.716 |
| 12            | C22           | 6.905                   | 19.094 | 12.88  |
| 13            | C23           | 6.166                   | 18.788 | 11.721 |
| 14            | C35           | 9.573                   | 7.365  | 16.993 |
| 15            | C36           | 9.142                   | 6.13   | 16.468 |
| 16            | C37           | 9.317                   | 4.923  | 17.175 |
| 17            | C38           | 9.945                   | 4.978  | 18.428 |
| 18            | C39           | 10.396                  | 6.183  | 18.962 |
| 19            | C40           | 10.199                  | 7.363  | 18.249 |
| 20            | C41           | 9.961                   | 8.769  | 14.879 |
| 21            | C42           | 11.268                  | 9.26   | 14.752 |
| 22            | C43           | 11.86                   | 9.429  | 13.504 |
| 23            | C44           | 11.148                  | 9.108  | 12.35  |
| 24            | C45           | 9.838                   | 8.609  | 12.416 |
| 25            | C46           | 9.28                    | 8.411  | 13.697 |
| 26            | C48           | 9.47                    | 3.191  | 15.307 |
| 27            | C49           | 10.701                  | 2.517  | 15.319 |
| 28            | C50           | 11.31                   | 2.097  | 14.139 |
| 29            | C51           | 10.689                  | 2.333  | 12.916 |
| 30            | C52           | 9.452                   | 2.992  | 12.847 |
| 31            | C53           | 8.885                   | 3.453  | 14.055 |
| 32            | C64           | -1.61                   | 4.072  | 8.162  |
| 33            | C65           | -1.983                  | 5.226  | 7.236  |
| 34            | C66           | -1.625                  | 6.549  | 7.542  |
| 35            | C67           | -2.006                  | 7.623  | 6.715  |
| 36            | C68           | -2.702                  | 7.335  | 5.531  |
| 37            | C69           | -3.084                  | 6.033  | 5.213  |
| 38            | C70           | -2.747                  | 5      | 6.083  |
| 39            | C82           | 2.18                    | 19.803 | 9.145  |
| 40            | C83           | 3.327                   | 18.997 | 9.283  |
| 41            | C84           | 4.63                    | 19.499 | 9.102  |
| 42            | C85           | 4.758                   | 20.868 | 8.818  |
| 43            | C86           | 3.645                   | 21.705 | 8.729  |
| 44            | C87           | 2.369                   | 21.168 | 8.892  |
| 45            | C88           | 0.135                   | 19.335 | 10.639 |
| 46            | C89           | -1.244                  | 19.565 | 10.771 |
| 47            | C91           | -1.095                  | 19.408 | 13.168 |
| 48            | C93           | 0.884                   | 19.143 | 11.816 |
| 49            | C95           | 2.459                   | 19.697 | 14.376 |
| 50            | C96           | 2.488                   | 21.099 | 14.468 |
| 51            | C97           | 3.689                   | 21.802 | 14.488 |
| 52            | C98           | 4.895                   | 21.111 | 14.413 |
| 53            | C99           | 4.931                   | 19.708 | 14.342 |
| 54            | C100          | 3.695                   | 19.027 | 14.317 |
| 55            | C111          | -2.308                  | 9.769  | 10.896 |
| 56            | C112          | -1.711                  | 9.359  | 9.689  |



|     |      |        |        |        |
|-----|------|--------|--------|--------|
| 57  | C113 | -2.392 | 9.428  | 8.455  |
| 58  | C114 | -3.733 | 9.842  | 8.471  |
| 59  | C115 | -4.367 | 10.209 | 9.655  |
| 60  | C116 | -3.65  | 10.182 | 10.85  |
| 61  | C117 | -1.954 | 8.664  | 13.169 |
| 62  | C118 | -1.824 | 7.315  | 12.782 |
| 63  | C119 | -2.203 | 6.261  | 13.636 |
| 64  | C120 | -2.714 | 6.591  | 14.901 |
| 65  | C121 | -2.833 | 7.916  | 15.316 |
| 66  | C122 | -2.444 | 8.939  | 14.454 |
| 67  | C124 | -2.655 | 4.454  | 11.875 |
| 68  | C125 | -4     | 4.071  | 11.795 |
| 69  | C126 | -4.574 | 3.692  | 10.583 |
| 70  | C127 | -3.807 | 3.69   | 9.419  |
| 71  | C128 | -2.461 | 4.089  | 9.436  |
| 72  | C129 | -1.916 | 4.489  | 10.677 |
| 73  | C1   | 6.283  | 17.457 | 14.649 |
| 74  | C2   | 5.939  | 17.189 | 16.12  |
| 75  | C3   | 6.375  | 15.795 | 16.588 |
| 76  | C4   | 5.739  | 14.651 | 15.795 |
| 77  | C5   | 6.217  | 13.289 | 16.309 |
| 78  | C6   | 5.627  | 12.153 | 15.473 |
| 79  | C7   | 5.99   | 10.756 | 15.979 |
| 80  | C8   | 7.487  | 10.457 | 15.912 |
| 81  | C9   | 7.783  | 8.999  | 16.292 |
| 82  | C10  | 5.874  | 18.6   | 9.197  |
| 83  | C11  | 0.621  | 17.753 | 8.752  |
| 84  | C12  | 0.767  | 19.219 | 9.249  |
| 85  | C13  | 0.995  | 17.574 | 7.273  |
| 86  | C14  | 0.69   | 16.17  | 6.741  |
| 87  | C15  | 1.545  | 15.075 | 7.383  |
| 88  | C16  | 1.196  | 13.7   | 6.807  |
| 89  | C17  | 1.597  | 11.175 | 7.044  |
| 90  | C18  | 1.955  | 12.585 | 7.529  |
| 91  | C19  | 0.105  | 10.863 | 7.178  |
| 92  | C20  | -0.195 | 9.365  | 7.036  |
| 93  | C21  | -1.714 | 9.065  | 7.126  |
| 94  | C22  | -1.547 | 9.798  | 12.226 |
| 95  | C23  | 0.003  | 9.873  | 12.155 |
| 96  | C24  | 0.504  | 11.174 | 11.512 |
| 97  | C25  | 2.022  | 11.358 | 11.6   |
| 98  | C26  | 2.588  | 11.501 | 13.015 |
| 99  | C27  | 1.925  | 12.571 | 13.889 |
| 100 | C28  | 2.009  | 13.982 | 13.303 |
| 101 | C29  | 1.522  | 15.021 | 14.314 |
| 102 | C30  | 1.46   | 16.426 | 13.705 |
| 103 | C31  | 1.117  | 17.466 | 14.785 |
| 104 | C32  | 1.112  | 18.961 | 14.36  |
| 105 | C33  | -0.529 | 4.353  | 13.36  |
| 106 | C34  | -0.072 | 3.986  | 8.368  |
| 107 | C35  | 0.335  | 2.64   | 8.985  |
| 108 | C36  | 1.57   | 2.753  | 9.879  |
| 109 | C37  | 1.273  | 3.607  | 15.024 |
| 110 | C38  | 2.789  | 2.667  | 16.876 |
| 111 | C39  | 1.819  | 1.426  | 10.596 |
| 112 | C40  | 4.167  | 3.01   | 16.302 |
| 113 | C41  | 5.214  | 2.025  | 16.835 |
| 114 | C42  | 2.842  | 1.53   | 11.722 |
| 115 | C43  | 5.236  | 1.688  | 12.414 |
| 116 | C44  | 6.705  | 1.733  | 12.01  |
| 117 | C45  | 4.271  | 1.764  | 11.232 |
| 118 | C46  | 1.682  | 3.653  | 16.5   |
| 119 | C47  | -0.042 | 4.367  | 14.819 |

|     |     |        |        |        |
|-----|-----|--------|--------|--------|
| 120 | C48 | 6.63   | 2.231  | 16.289 |
| 121 | C49 | 7.237  | 3.599  | 16.632 |
| 122 | C50 | 9.303  | 8.679  | 16.259 |
| 123 | C51 | 8.795  | 3.596  | 16.619 |
| 124 | C52 | 8.731  | 3.195  | 11.512 |
| 125 | C53 | 9.046  | 8.284  | 11.149 |
| 126 | C54 | 7.512  | 8.536  | 11.21  |
| 127 | C55 | 7.09   | 9.973  | 11.58  |
| 128 | C56 | 7.716  | 11.059 | 10.7   |
| 129 | C57 | 7.311  | 12.467 | 11.15  |
| 130 | C58 | 6.26   | 18.958 | 14.261 |
| 131 | C59 | 7.181  | 3.129  | 11.577 |
| 132 | C60 | -1.861 | 19.606 | 12.02  |
| 133 | O1  | 11.818 | 9.327  | 11.176 |
| 134 | O2  | 11.97  | 9.599  | 15.877 |
| 135 | O3  | 11.309 | 2.256  | 16.516 |
| 136 | O4  | 10.596 | 8.551  | 18.803 |
| 137 | O5  | 10.091 | 3.828  | 19.157 |
| 138 | O6  | 11.361 | 1.871  | 11.816 |
| 139 | O7  | 10.745 | 3.095  | 9.526  |
| 140 | O8  | 11.017 | 7.842  | 9.155  |
| 141 | O9  | -4.427 | 9.898  | 7.293  |
| 142 | O10 | -4.263 | 10.584 | 12.006 |
| 143 | O11 | -4.759 | 4.053  | 12.934 |
| 144 | O12 | -4.461 | 3.262  | 8.294  |
| 145 | O13 | -3.074 | 5.588  | 15.76  |
| 146 | O14 | -2.521 | 10.239 | 14.877 |
| 147 | O15 | -1.702 | 19.411 | 14.395 |
| 148 | O16 | -2     | 19.725 | 9.64   |
| 149 | O17 | 1.308  | 21.787 | 14.55  |
| 150 | O18 | 1.274  | 21.982 | 8.787  |
| 151 | O19 | 6.006  | 21.391 | 8.612  |
| 152 | O20 | 8.622  | 19.436 | 9.085  |
| 153 | O21 | 9.031  | 19.829 | 13.779 |
| 154 | O22 | 6.017  | 21.895 | 14.419 |
| 155 | O23 | -3.024 | 8.356  | 4.679  |
| 156 | O24 | -3.224 | 3.733  | 5.857  |
| 157 | C61 | -2.017 | 4.8    | 13.228 |
| 158 | C62 | 8.112  | 13.556 | 10.424 |
| 159 | C63 | 5.567  | 17.076 | 9.115  |
| 160 | C64 | 6.451  | 14.719 | 8.858  |
| 161 | C65 | 6.821  | 16.196 | 9.041  |
| 162 | C66 | 7.672  | 13.8   | 8.975  |
| 163 | H1  | 5.619  | 16.877 | 13.996 |
| 164 | H2  | 7.295  | 17.07  | 14.465 |
| 165 | H3  | 4.863  | 17.304 | 16.288 |
| 166 | H4  | 6.44   | 17.929 | 16.756 |
| 167 | H5  | 6.117  | 15.688 | 17.648 |
| 168 | H6  | 7.468  | 15.722 | 16.523 |
| 169 | H7  | 6      | 14.736 | 14.734 |
| 170 | H8  | 4.648  | 14.714 | 15.869 |
| 171 | H9  | 5.925  | 13.167 | 17.359 |
| 172 | H10 | 7.311  | 13.255 | 16.267 |
| 173 | H11 | 5.943  | 12.257 | 14.428 |
| 174 | H12 | 4.536  | 12.239 | 15.483 |
| 175 | H13 | 5.45   | 10.026 | 15.364 |
| 176 | H14 | 5.633  | 10.633 | 17.008 |
| 177 | H15 | 8.028  | 11.118 | 16.598 |
| 178 | H16 | 7.853  | 10.671 | 14.903 |
| 179 | H17 | 7.215  | 8.318  | 15.648 |
| 180 | H18 | 7.405  | 8.832  | 17.31  |
| 181 | H19 | 6.453  | 18.821 | 8.29   |
| 182 | H20 | -0.424 | 17.437 | 8.874  |

|     |     |        |        |        |
|-----|-----|--------|--------|--------|
| 183 | H21 | 1.207  | 17.077 | 9.384  |
| 184 | H22 | 0.158  | 19.817 | 8.556  |
| 185 | H23 | 2.056  | 17.792 | 7.109  |
| 186 | H24 | 0.428  | 18.296 | 6.673  |
| 187 | H25 | 0.862  | 16.167 | 5.657  |
| 188 | H26 | -0.373 | 15.949 | 6.892  |
| 189 | H27 | 1.379  | 15.057 | 8.466  |
| 190 | H28 | 2.609  | 15.288 | 7.221  |
| 191 | H29 | 1.429  | 13.674 | 5.736  |
| 192 | H30 | 0.116  | 13.547 | 6.909  |
| 193 | H31 | 2.179  | 10.458 | 7.635  |
| 194 | H32 | 1.905  | 11.052 | 5.999  |
| 195 | H33 | 3.034  | 12.737 | 7.402  |
| 196 | H34 | 1.755  | 12.649 | 8.605  |
| 197 | H35 | -0.451 | 11.409 | 6.407  |
| 198 | H36 | -0.252 | 11.227 | 8.146  |
| 199 | H37 | 0.365  | 8.799  | 7.788  |
| 200 | H38 | 0.181  | 9.027  | 6.061  |
| 201 | H39 | -2.158 | 9.735  | 6.378  |
| 202 | H40 | -1.84  | 10.751 | 12.687 |
| 203 | H41 | 0.424  | 9.009  | 11.628 |
| 204 | H42 | 0.391  | 9.817  | 13.18  |
| 205 | H43 | -0.003 | 12.035 | 11.962 |
| 206 | H44 | 0.232  | 11.189 | 10.452 |
| 207 | H45 | 2.296  | 12.247 | 11.019 |
| 208 | H46 | 2.516  | 10.511 | 11.108 |
| 209 | H47 | 3.66   | 11.721 | 12.934 |
| 210 | H48 | 2.521  | 10.538 | 13.534 |
| 211 | H49 | 2.41   | 12.559 | 14.872 |
| 212 | H50 | 0.877  | 12.309 | 14.073 |
| 213 | H51 | 1.404  | 14.046 | 12.392 |
| 214 | H52 | 3.046  | 14.207 | 13.022 |
| 215 | H53 | 2.195  | 15.021 | 15.18  |
| 216 | H54 | 0.526  | 14.744 | 14.681 |
| 217 | H55 | 0.693  | 16.43  | 12.922 |
| 218 | H56 | 2.411  | 16.656 | 13.218 |
| 219 | H57 | 1.785  | 17.339 | 15.647 |
| 220 | H58 | 0.111  | 17.219 | 15.154 |
| 221 | H59 | 0.575  | 19.448 | 15.189 |
| 222 | H60 | -0.429 | 3.332  | 12.967 |
| 223 | H61 | 0.133  | 4.991  | 12.761 |
| 224 | H62 | 0.295  | 4.826  | 8.968  |
| 225 | H63 | 0.435  | 4.079  | 7.398  |
| 226 | H64 | 0.524  | 1.917  | 8.181  |
| 227 | H65 | -0.486 | 2.224  | 9.579  |
| 228 | H66 | 1.411  | 3.542  | 10.623 |
| 229 | H67 | 2.441  | 3.037  | 9.279  |
| 230 | H68 | 1.142  | 2.566  | 14.707 |
| 231 | H69 | 2.061  | 4.042  | 14.4   |
| 232 | H70 | 2.861  | 2.646  | 17.971 |
| 233 | H71 | 2.499  | 1.656  | 16.564 |
| 234 | H72 | 2.128  | 0.662  | 9.872  |
| 235 | H73 | 0.878  | 1.074  | 11.04  |
| 236 | H74 | 4.437  | 4.032  | 16.586 |
| 237 | H75 | 4.138  | 2.966  | 15.21  |
| 238 | H76 | 4.901  | 1.003  | 16.587 |
| 239 | H77 | 5.244  | 2.083  | 17.93  |
| 240 | H78 | 2.808  | 0.592  | 12.292 |
| 241 | H79 | 2.552  | 2.328  | 12.417 |
| 242 | H80 | 5.066  | 0.746  | 12.951 |
| 243 | H81 | 5.02   | 2.495  | 13.121 |
| 244 | H82 | 6.899  | 1.011  | 11.207 |
| 245 | H83 | 7.284  | 1.389  | 12.874 |

|     |     |        |        |        |
|-----|-----|--------|--------|--------|
| 246 | H84 | 4.535  | 1.002  | 10.49  |
| 247 | H85 | 4.351  | 2.741  | 10.744 |
| 248 | H86 | 1.98   | 4.672  | 16.772 |
| 249 | H87 | 0.808  | 3.411  | 17.118 |
| 250 | H88 | 0.084  | 5.403  | 15.155 |
| 251 | H89 | -0.807 | 3.909  | 15.458 |
| 252 | H90 | 6.621  | 2.088  | 15.204 |
| 253 | H91 | 7.26   | 1.435  | 16.705 |
| 254 | H92 | 6.907  | 3.887  | 17.639 |
| 255 | H93 | 6.832  | 4.36   | 15.954 |
| 256 | H94 | 9.749  | 9.493  | 16.846 |
| 257 | H95 | 9.052  | 2.801  | 17.33  |
| 258 | H96 | 8.976  | 2.327  | 10.885 |
| 259 | H97 | 9.373  | 8.991  | 10.379 |
| 260 | H98 | 7.028  | 7.851  | 11.915 |
| 261 | H99 | 7.083  | 8.299  | 10.227 |
| 262 | H0  | 7.336  | 10.168 | 12.628 |
| 263 | H1  | 5.997  | 10.039 | 11.507 |
| 264 | H2  | 7.426  | 10.892 | 9.657  |
| 265 | H3  | 8.808  | 10.995 | 10.75  |
| 266 | H4  | 7.511  | 12.562 | 12.225 |
| 267 | H5  | 6.234  | 12.614 | 11.014 |
| 268 | H6  | 6.902  | 19.454 | 15.001 |
| 269 | H7  | 6.767  | 3.347  | 10.584 |
| 270 | H8  | 6.772  | 3.892  | 12.247 |
| 271 | H9  | -2.93  | 19.771 | 12.098 |
| 272 | H10 | 11.417 | 8.797  | 10.454 |
| 273 | H11 | 12.864 | 9.878  | 15.622 |
| 274 | H12 | 12.163 | 1.824  | 16.351 |
| 275 | H13 | 11.092 | 8.377  | 19.618 |
| 276 | H14 | 10.631 | 4.01   | 19.943 |
| 277 | H15 | 11.037 | 2.321  | 11.007 |
| 278 | H16 | 11.282 | 3.168  | 8.716  |
| 279 | H17 | 11.518 | 7.584  | 8.359  |
| 280 | H18 | -5.347 | 10.15  | 7.471  |
| 281 | H19 | -5.197 | 10.777 | 11.829 |
| 282 | H20 | -5.669 | 3.804  | 12.704 |
| 283 | H21 | -3.912 | 3.4    | 7.495  |
| 284 | H22 | -3.477 | 5.972  | 16.555 |
| 285 | H23 | -2.956 | 10.27  | 15.744 |
| 286 | H24 | -2.64  | 19.636 | 14.288 |
| 287 | H25 | -2.917 | 19.921 | 9.892  |
| 288 | H26 | 1.494  | 22.739 | 14.55  |
| 289 | H27 | 1.564  | 22.899 | 8.662  |
| 290 | H28 | 5.94   | 22.349 | 8.477  |
| 291 | H29 | 9.507  | 19.824 | 9.175  |
| 292 | H30 | 8.911  | 19.144 | 14.459 |
| 293 | H31 | 6.768  | 21.404 | 14.046 |
| 294 | H32 | -3.578 | 8.016  | 3.959  |
| 295 | H33 | -3.594 | 3.698  | 4.956  |
| 296 | H34 | -2.55  | 4.165  | 13.948 |
| 297 | H35 | 4.955  | 16.883 | 8.225  |
| 298 | H36 | 5.684  | 14.423 | 9.582  |
| 299 | H37 | 6.01   | 14.593 | 7.861  |
| 300 | H38 | 7.452  | 16.519 | 8.205  |
| 301 | H39 | 7.409  | 16.321 | 9.956  |
| 302 | H40 | 8.043  | 14.484 | 11.001 |
| 303 | H41 | 9.174  | 13.277 | 10.426 |
| 304 | H42 | 7.45   | 12.846 | 8.484  |
| 305 | H43 | 8.507  | 14.245 | 8.419  |
| 306 | H3  | 8.104  | 5.831  | 12     |
| 307 | H6  | 11.608 | 5.363  | 8.503  |
| 308 | H20 | 9.829  | 19.987 | 11.373 |

|     |      |        |        |        |
|-----|------|--------|--------|--------|
| 309 | H23  | 5.135  | 18.452 | 11.818 |
| 310 | H36  | 8.642  | 6.11   | 15.503 |
| 311 | H39  | 10.869 | 6.206  | 19.938 |
| 312 | H43  | 12.869 | 9.817  | 13.405 |
| 313 | H46  | 8.279  | 7.998  | 13.774 |
| 314 | H50  | 12.263 | 1.576  | 14.15  |
| 315 | H53  | 7.949  | 4.002  | 14.027 |
| 316 | H64  | -1.845 | 3.125  | 7.658  |
| 317 | H66  | -1.075 | 6.751  | 8.458  |
| 318 | H69  | -3.661 | 5.833  | 4.317  |
| 319 | H83  | 3.192  | 17.947 | 9.521  |
| 320 | H86  | 3.77   | 22.761 | 8.517  |
| 321 | H93  | 1.95   | 18.942 | 11.745 |
| 322 | H97  | 3.708  | 22.885 | 14.556 |
| 323 | CH00 | 3.703  | 17.947 | 14.253 |
| 324 | CH12 | -0.684 | 9.007  | 9.702  |
| 325 | CH15 | -5.401 | 10.534 | 9.645  |
| 326 | CH18 | -1.419 | 7.09   | 11.799 |
| 327 | CH21 | -3.209 | 8.148  | 16.306 |
| 328 | CH26 | -5.612 | 3.38   | 10.525 |
| 329 | CH29 | -0.884 | 4.819  | 10.726 |
| 330 | H1   | 4.978  | 16.753 | 9.983  |
| 331 | C1   | 3.182  | 7.591  | 8.793  |
| 332 | C2   | 3.339  | 6.435  | 9.78   |
| 333 | C3   | 3.667  | 6.943  | 11.184 |
| 334 | C4   | 3.85   | 5.779  | 12.158 |
| 335 | C5   | 4.294  | 6.215  | 13.557 |
| 336 | C6   | 3.274  | 7.112  | 14.261 |
| 337 | C7   | 3.653  | 7.341  | 15.724 |
| 338 | C8   | 2.654  | 8.268  | 16.416 |
| 339 | C9   | 3.005  | 8.467  | 17.881 |
| 340 | C10  | 2.845  | 7.086  | 7.399  |
| 341 | H2   | 2.39   | 8.267  | 9.136  |
| 342 | H3   | 4.11   | 8.173  | 8.751  |
| 343 | H4   | 4.133  | 5.762  | 9.434  |
| 344 | H5   | 2.411  | 5.852  | 9.811  |
| 345 | H6   | 2.857  | 7.598  | 11.525 |
| 346 | H7   | 4.582  | 7.546  | 11.153 |
| 347 | H8   | 4.606  | 5.092  | 11.76  |
| 348 | H9   | 2.915  | 5.21   | 12.231 |
| 349 | H10  | 5.259  | 6.732  | 13.494 |
| 350 | H11  | 4.461  | 5.312  | 14.156 |
| 351 | H12  | 2.279  | 6.656  | 14.208 |
| 352 | H13  | 3.216  | 8.079  | 13.749 |
| 353 | H14  | 3.687  | 6.38   | 16.249 |
| 354 | H15  | 4.659  | 7.771  | 15.783 |
| 355 | H16  | 2.64   | 9.242  | 15.913 |
| 356 | H17  | 1.644  | 7.849  | 16.341 |
| 357 | H18  | 2.284  | 9.14   | 18.355 |
| 358 | H19  | 2.985  | 7.514  | 18.421 |
| 359 | H20  | 4.002  | 8.903  | 17.991 |
| 360 | H21  | 3.629  | 6.421  | 7.022  |
| 361 | H22  | 1.899  | 6.537  | 7.399  |
| 362 | H23  | 2.751  | 7.926  | 6.704  |

**Table S11.** Cartesian coordinates of the structure of (dodecane)<sub>2</sub>C<sub>1</sub> optimized by MacroModel Ver 9.1 using the MMFFs force field.

| Center Number | Atomic Number | Coordinates (Angstroms) |        |        |
|---------------|---------------|-------------------------|--------|--------|
|               |               | X                       | Y      | Z      |
| 1             | C1            | 10.076                  | 4.372  | 9.591  |
| 2             | C2            | 9.124                   | 4.462  | 10.619 |
| 3             | C02B          | 0.308                   | 19.131 | 13.166 |
| 4             | C3            | 8.716                   | 5.742  | 11.039 |
| 5             | C4            | 9.246                   | 6.906  | 10.454 |
| 6             | C5            | 10.184                  | 6.756  | 9.418  |
| 7             | C6            | 10.593                  | 5.503  | 8.97   |
| 8             | C18           | 6.751                   | 18.951 | 10.528 |
| 9             | C19           | 8.077                   | 19.393 | 10.429 |
| 10            | C20           | 8.82                    | 19.698 | 11.567 |
| 11            | C21           | 8.248                   | 19.536 | 12.825 |
| 12            | C22           | 6.928                   | 19.095 | 12.978 |
| 13            | C23           | 6.197                   | 18.796 | 11.813 |
| 14            | C35           | 9.797                   | 7.35   | 16.783 |
| 15            | C36           | 9.32                    | 6.124  | 16.277 |
| 16            | C37           | 9.527                   | 4.909  | 16.962 |
| 17            | C38           | 10.241                  | 4.945  | 18.169 |
| 18            | C39           | 10.743                  | 6.14   | 18.679 |
| 19            | C40           | 10.511                  | 7.33   | 17.991 |
| 20            | C41           | 10.049                  | 8.776  | 14.665 |
| 21            | C42           | 11.342                  | 9.279  | 14.461 |
| 22            | C43           | 11.856                  | 9.457  | 13.18  |
| 23            | C44           | 11.078                  | 9.133  | 12.071 |
| 24            | C45           | 9.778                   | 8.622  | 12.213 |
| 25            | C46           | 9.3                     | 8.416  | 13.525 |
| 26            | C48           | 9.56                    | 3.185  | 15.086 |
| 27            | C49           | 10.783                  | 2.498  | 15.04  |
| 28            | C50           | 11.338                  | 2.082  | 13.831 |
| 29            | C51           | 10.666                  | 2.332  | 12.639 |
| 30            | C52           | 9.431                   | 2.997  | 12.629 |
| 31            | C53           | 8.923                   | 3.458  | 13.863 |
| 32            | C64           | -1.6                    | 4.074  | 8.189  |
| 33            | C65           | -1.923                  | 5.232  | 7.249  |
| 34            | C66           | -1.529                  | 6.545  | 7.553  |
| 35            | C67           | -1.861                  | 7.624  | 6.712  |
| 36            | C68           | -2.541                  | 7.348  | 5.515  |
| 37            | C69           | -2.958                  | 6.057  | 5.2    |
| 38            | C70           | -2.674                  | 5.021  | 6.085  |
| 39            | C82           | 2.208                   | 19.787 | 9.231  |
| 40            | C83           | 3.367                   | 18.998 | 9.368  |
| 41            | C84           | 4.663                   | 19.522 | 9.195  |
| 42            | C85           | 4.772                   | 20.894 | 8.924  |
| 43            | C86           | 3.645                   | 21.714 | 8.837  |
| 44            | C87           | 2.377                   | 21.157 | 8.989  |
| 45            | C88           | 0.165                   | 19.28  | 10.712 |
| 46            | C89           | -1.218                  | 19.489 | 10.838 |
| 47            | C91           | -1.077                  | 19.332 | 13.235 |
| 48            | C93           | 0.911                   | 19.097 | 11.891 |
| 49            | C95           | 2.473                   | 19.655 | 14.46  |
| 50            | C96           | 2.492                   | 21.056 | 14.556 |
| 51            | C97           | 3.689                   | 21.766 | 14.585 |
| 52            | C98           | 4.9                     | 21.082 | 14.515 |
| 53            | C99           | 4.945                   | 19.68  | 14.438 |
| 54            | C100          | 3.714                   | 18.992 | 14.407 |
| 55            | C111          | -2.179                  | 9.801  | 10.881 |
| 56            | C112          | -1.571                  | 9.377  | 9.684  |

|     |      |        |        |        |
|-----|------|--------|--------|--------|
| 57  | C113 | -2.237 | 9.437  | 8.443  |
| 58  | C114 | -3.576 | 9.857  | 8.44   |
| 59  | C115 | -4.222 | 10.237 | 9.615  |
| 60  | C116 | -3.519 | 10.218 | 10.817 |
| 61  | C117 | -1.847 | 8.719  | 13.17  |
| 62  | C118 | -1.74  | 7.367  | 12.789 |
| 63  | C119 | -2.129 | 6.324  | 13.652 |
| 64  | C120 | -2.619 | 6.669  | 14.922 |
| 65  | C121 | -2.715 | 7.998  | 15.33  |
| 66  | C122 | -2.321 | 9.01   | 14.457 |
| 67  | C124 | -2.627 | 4.526  | 11.898 |
| 68  | C125 | -3.986 | 4.195  | 11.821 |
| 69  | C126 | -4.577 | 3.834  | 10.611 |
| 70  | C127 | -3.811 | 3.795  | 9.446  |
| 71  | C128 | -2.45  | 4.138  | 9.46   |
| 72  | C129 | -1.89  | 4.525  | 10.698 |
| 73  | C1   | 6.31   | 17.432 | 14.725 |
| 74  | C2   | 5.973  | 17.145 | 16.194 |
| 75  | C3   | 6.437  | 15.756 | 16.65  |
| 76  | C4   | 5.801  | 14.603 | 15.87  |
| 77  | C5   | 6.323  | 13.249 | 16.362 |
| 78  | C6   | 5.71   | 12.1   | 15.56  |
| 79  | C7   | 6.134  | 10.711 | 16.04  |
| 80  | C8   | 7.628  | 10.438 | 15.871 |
| 81  | C9   | 7.964  | 8.981  | 16.216 |
| 82  | C10  | 5.918  | 18.637 | 9.285  |
| 83  | C11  | 0.687  | 17.711 | 8.821  |
| 84  | C12  | 0.805  | 19.178 | 9.324  |
| 85  | C13  | 1.079  | 17.541 | 7.345  |
| 86  | C14  | 0.805  | 16.135 | 6.804  |
| 87  | C15  | 1.68   | 15.051 | 7.44   |
| 88  | C16  | 1.358  | 13.675 | 6.85   |
| 89  | C17  | 1.78   | 11.149 | 7.077  |
| 90  | C18  | 2.127  | 12.562 | 7.566  |
| 91  | C19  | 0.286  | 10.837 | 7.191  |
| 92  | C20  | -0.021 | 9.339  | 7.054  |
| 93  | C21  | -1.546 | 9.06   | 7.125  |
| 94  | C22  | -1.431 | 9.842  | 12.217 |
| 95  | C23  | 0.119  | 9.912  | 12.159 |
| 96  | C24  | 0.632  | 11.206 | 11.512 |
| 97  | C25  | 2.151  | 11.376 | 11.603 |
| 98  | C26  | 2.721  | 11.497 | 13.02  |
| 99  | C27  | 2.051  | 12.543 | 13.916 |
| 100 | C28  | 2.114  | 13.963 | 13.351 |
| 101 | C29  | 1.603  | 14.98  | 14.373 |
| 102 | C30  | 1.507  | 16.386 | 13.772 |
| 103 | C31  | 1.146  | 17.413 | 14.856 |
| 104 | C32  | 1.13   | 18.91  | 14.437 |
| 105 | C33  | -0.495 | 4.383  | 13.371 |
| 106 | C34  | -0.068 | 3.929  | 8.395  |
| 107 | C35  | 0.285  | 2.577  | 9.032  |
| 108 | C36  | 1.544  | 2.654  | 9.893  |
| 109 | C37  | 1.338  | 3.666  | 15.014 |
| 110 | C38  | 2.921  | 2.829  | 16.858 |
| 111 | C39  | 1.765  | 1.331  | 10.626 |
| 112 | C40  | 4.288  | 3.133  | 16.236 |
| 113 | C41  | 5.327  | 2.137  | 16.765 |
| 114 | C42  | 2.814  | 1.423  | 11.729 |
| 115 | C43  | 5.223  | 1.611  | 12.362 |
| 116 | C44  | 6.678  | 1.699  | 11.918 |
| 117 | C45  | 4.226  | 1.686  | 11.209 |
| 118 | C46  | 1.811  | 3.805  | 16.465 |
| 119 | C47  | 0.004  | 4.398  | 14.824 |

|     |     |        |        |        |
|-----|-----|--------|--------|--------|
| 120 | C48 | 6.734  | 2.292  | 16.183 |
| 121 | C49 | 7.393  | 3.641  | 16.504 |
| 122 | C50 | 9.48   | 8.672  | 16.083 |
| 123 | C51 | 8.949  | 3.597  | 16.427 |
| 124 | C52 | 8.647  | 3.202  | 11.332 |
| 125 | C53 | 8.912  | 8.298  | 10.994 |
| 126 | C54 | 7.385  | 8.55   | 11.148 |
| 127 | C55 | 6.986  | 9.981  | 11.561 |
| 128 | C56 | 7.609  | 11.084 | 10.701 |
| 129 | C57 | 7.236  | 12.485 | 11.197 |
| 130 | C58 | 6.278  | 18.937 | 14.355 |
| 131 | C59 | 7.103  | 3.109  | 11.471 |
| 132 | C60 | -1.841 | 19.52  | 12.085 |
| 133 | O1  | 11.674 | 9.364  | 10.86  |
| 134 | O2  | 12.108 | 9.619  | 15.542 |
| 135 | O3  | 11.44  | 2.221  | 16.208 |
| 136 | O4  | 10.958 | 8.508  | 18.526 |
| 137 | O5  | 10.421 | 3.788  | 18.877 |
| 138 | O6  | 11.286 | 1.877  | 11.506 |
| 139 | O7  | 10.563 | 3.132  | 9.255  |
| 140 | O8  | 10.77  | 7.881  | 8.891  |
| 141 | O9  | -4.258 | 9.906  | 7.255  |
| 142 | O10 | -4.142 | 10.631 | 11.964 |
| 143 | O11 | -4.744 | 4.213  | 12.96  |
| 144 | O12 | -4.482 | 3.389  | 8.322  |
| 145 | O13 | -2.983 | 5.675  | 15.791 |
| 146 | O14 | -2.376 | 10.313 | 14.872 |
| 147 | O15 | -1.689 | 19.326 | 14.46  |
| 148 | O16 | -1.972 | 19.639 | 9.704  |
| 149 | O17 | 1.307  | 21.736 | 14.633 |
| 150 | O18 | 1.269  | 21.954 | 8.884  |
| 151 | O19 | 6.012  | 21.437 | 8.729  |
| 152 | O20 | 8.655  | 19.509 | 9.195  |
| 153 | O21 | 9.04   | 19.845 | 13.895 |
| 154 | O22 | 6.017  | 21.874 | 14.53  |
| 155 | O23 | -2.812 | 8.372  | 4.649  |
| 156 | O24 | -3.191 | 3.769  | 5.863  |
| 157 | C61 | -1.975 | 4.858  | 13.247 |
| 158 | C62 | 8.089  | 13.576 | 10.533 |
| 159 | C63 | 5.627  | 17.113 | 9.181  |
| 160 | C64 | 6.526  | 14.768 | 8.893  |
| 161 | C65 | 6.886  | 16.243 | 9.113  |
| 162 | C66 | 7.738  | 13.848 | 9.064  |
| 163 | H1  | 5.649  | 16.854 | 14.068 |
| 164 | H2  | 7.324  | 17.053 | 14.533 |
| 165 | H3  | 4.896  | 17.24  | 16.364 |
| 166 | H4  | 6.463  | 17.888 | 16.835 |
| 167 | H5  | 6.201  | 15.644 | 17.715 |
| 168 | H6  | 7.53   | 15.697 | 16.564 |
| 169 | H7  | 6.026  | 14.699 | 14.802 |
| 170 | H8  | 4.711  | 14.644 | 15.979 |
| 171 | H9  | 6.085  | 13.125 | 17.425 |
| 172 | H10 | 7.414  | 13.232 | 16.267 |
| 173 | H11 | 5.96   | 12.213 | 14.498 |
| 174 | H12 | 4.62   | 12.162 | 15.638 |
| 175 | H13 | 5.57   | 9.969  | 15.463 |
| 176 | H14 | 5.848  | 10.581 | 17.09  |
| 177 | H15 | 8.204  | 11.101 | 16.526 |
| 178 | H16 | 7.925  | 10.665 | 14.842 |
| 179 | H17 | 7.36   | 8.3    | 15.605 |
| 180 | H18 | 7.654  | 8.801  | 17.256 |
| 181 | H19 | 6.498  | 18.877 | 8.384  |
| 182 | H20 | -0.354 | 17.377 | 8.933  |



|     |     |        |        |        |
|-----|-----|--------|--------|--------|
| 183 | H21 | 1.278  | 17.041 | 9.457  |
| 184 | H22 | 0.19   | 19.767 | 8.629  |
| 185 | H23 | 2.137  | 17.779 | 7.191  |
| 186 | H24 | 0.504  | 18.255 | 6.742  |
| 187 | H25 | 0.979  | 16.142 | 5.721  |
| 188 | H26 | -0.255 | 15.891 | 6.95   |
| 189 | H27 | 1.512  | 15.022 | 8.522  |
| 190 | H28 | 2.74   | 15.285 | 7.281  |
| 191 | H29 | 1.597  | 13.661 | 5.78   |
| 192 | H30 | 0.279  | 13.506 | 6.944  |
| 193 | H31 | 2.355  | 10.431 | 7.674  |
| 194 | H32 | 2.101  | 11.028 | 6.035  |
| 195 | H33 | 3.205  | 12.724 | 7.439  |
| 196 | H34 | 1.926  | 12.62  | 8.642  |
| 197 | H35 | -0.257 | 11.38  | 6.408  |
| 198 | H36 | -0.084 | 11.209 | 8.151  |
| 199 | H37 | 0.528  | 8.771  | 7.814  |
| 200 | H38 | 0.362  | 8.995  | 6.083  |
| 201 | H39 | -1.971 | 9.736  | 6.371  |
| 202 | H40 | -1.726 | 10.801 | 12.666 |
| 203 | H41 | 0.543  | 9.041  | 11.644 |
| 204 | H42 | 0.497  | 9.864  | 13.187 |
| 205 | H43 | 0.132  | 12.071 | 11.961 |
| 206 | H44 | 0.362  | 11.221 | 10.453 |
| 207 | H45 | 2.433  | 12.271 | 11.035 |
| 208 | H46 | 2.64   | 10.532 | 11.1   |
| 209 | H47 | 3.791  | 11.727 | 12.941 |
| 210 | H48 | 2.663  | 10.524 | 13.519 |
| 211 | H49 | 2.543  | 12.522 | 14.895 |
| 212 | H50 | 1.008  | 12.265 | 14.104 |
| 213 | H51 | 1.513  | 14.031 | 12.437 |
| 214 | H52 | 3.148  | 14.21  | 13.079 |
| 215 | H53 | 2.278  | 14.99  | 15.237 |
| 216 | H54 | 0.614  | 14.677 | 14.739 |
| 217 | H55 | 0.736  | 16.377 | 12.993 |
| 218 | H56 | 2.45   | 16.638 | 13.279 |
| 219 | H57 | 1.811  | 17.29  | 15.721 |
| 220 | H58 | 0.141  | 17.154 | 15.218 |
| 221 | H59 | 0.585  | 19.391 | 15.264 |
| 222 | H60 | -0.416 | 3.358  | 12.985 |
| 223 | H61 | 0.173  | 5.005  | 12.762 |
| 224 | H62 | 0.334  | 4.762  | 8.983  |
| 225 | H63 | 0.441  | 3.987  | 7.423  |
| 226 | H64 | 0.42   | 1.83   | 8.24   |
| 227 | H65 | -0.54  | 2.214  | 9.655  |
| 228 | H66 | 1.435  | 3.462  | 10.627 |
| 229 | H67 | 2.409  | 2.893  | 9.266  |
| 230 | H68 | 1.205  | 2.607  | 14.762 |
| 231 | H69 | 2.094  | 4.071  | 14.333 |
| 232 | H70 | 3.022  | 2.861  | 17.951 |
| 233 | H71 | 2.616  | 1.807  | 16.604 |
| 234 | H72 | 2.041  | 0.55   | 9.907  |
| 235 | H73 | 0.824  | 1.011  | 11.091 |
| 236 | H74 | 4.585  | 4.157  | 16.486 |
| 237 | H75 | 4.227  | 3.065  | 15.146 |
| 238 | H76 | 4.983  | 1.117  | 16.546 |
| 239 | H77 | 5.384  | 2.216  | 17.858 |
| 240 | H78 | 2.804  | 0.476  | 12.284 |
| 241 | H79 | 2.531  | 2.206  | 12.443 |
| 242 | H80 | 5.089  | 0.656  | 12.887 |
| 243 | H81 | 5.009  | 2.402  | 13.089 |
| 244 | H82 | 6.868  | 0.983  | 11.109 |
| 245 | H83 | 7.291  | 1.373  | 12.765 |

|     |     |        |        |        |
|-----|-----|--------|--------|--------|
| 246 | H84 | 4.483  | 0.94   | 10.448 |
| 247 | H85 | 4.28   | 2.672  | 10.735 |
| 248 | H86 | 2.133  | 4.836  | 16.655 |
| 249 | H87 | 0.961  | 3.617  | 17.134 |
| 250 | H88 | 0.111  | 5.435  | 15.163 |
| 251 | H89 | -0.744 | 3.924  | 15.47  |
| 252 | H90 | 6.693  | 2.143  | 15.099 |
| 253 | H91 | 7.348  | 1.479  | 16.588 |
| 254 | H92 | 7.113  | 3.933  | 17.526 |
| 255 | H93 | 6.98   | 4.416  | 15.847 |
| 256 | H94 | 9.958  | 9.481  | 16.651 |
| 257 | H95 | 9.216  | 2.792  | 17.125 |
| 258 | H96 | 8.873  | 2.342  | 10.687 |
| 259 | H97 | 9.19   | 9.009  | 10.208 |
| 260 | H98 | 6.942  | 7.857  | 11.871 |
| 261 | H99 | 6.899  | 8.326  | 10.188 |
| 262 | H0  | 7.254  | 10.145 | 12.61  |
| 263 | H1  | 5.892  | 10.062 | 11.514 |
| 264 | H2  | 7.295  | 10.951 | 9.66   |
| 265 | H3  | 8.7    | 11.003 | 10.726 |
| 266 | H4  | 7.413  | 12.536 | 12.279 |
| 267 | H5  | 6.168  | 12.671 | 11.042 |
| 268 | H6  | 6.914  | 19.429 | 15.103 |
| 269 | H7  | 6.64   | 3.324  | 10.499 |
| 270 | H8  | 6.71   | 3.861  | 12.163 |
| 271 | H9  | -2.912 | 19.67  | 12.158 |
| 272 | H10 | 11.236 | 8.832  | 10.16  |
| 273 | H11 | 12.983 | 9.905  | 15.235 |
| 274 | H12 | 12.279 | 1.78   | 16.003 |
| 275 | H13 | 11.508 | 8.322  | 19.303 |
| 276 | H14 | 11.02  | 3.955  | 19.621 |
| 277 | H15 | 10.932 | 2.341  | 10.717 |
| 278 | H16 | 11.061 | 3.214  | 8.42   |
| 279 | H17 | 11.226 | 7.631  | 8.066  |
| 280 | H18 | -5.179 | 10.163 | 7.42   |
| 281 | H19 | -5.074 | 10.825 | 11.775 |
| 282 | H20 | -5.663 | 4      | 12.733 |
| 283 | H21 | -3.925 | 3.494  | 7.525  |
| 284 | H22 | -3.367 | 6.07   | 16.59  |
| 285 | H23 | -2.795 | 10.355 | 15.746 |
| 286 | H24 | -2.63  | 19.536 | 14.349 |
| 287 | H25 | -2.892 | 19.821 | 9.952  |
| 288 | H26 | 1.488  | 22.69  | 14.635 |
| 289 | H27 | 1.546  | 22.876 | 8.768  |
| 290 | H28 | 5.932  | 22.395 | 8.603  |
| 291 | H29 | 9.534  | 19.908 | 9.293  |
| 292 | H30 | 8.929  | 19.147 | 14.564 |
| 293 | H31 | 6.776  | 21.387 | 14.168 |
| 294 | H32 | -3.362 | 8.044  | 3.921  |
| 295 | H33 | -3.55  | 3.739  | 4.957  |
| 296 | H34 | -2.517 | 4.235  | 13.97  |
| 297 | H35 | 5.025  | 16.925 | 8.282  |
| 298 | H36 | 5.721  | 14.463 | 9.572  |
| 299 | H37 | 6.138  | 14.655 | 7.873  |
| 300 | H38 | 7.532  | 16.584 | 8.295  |
| 301 | H39 | 7.457  | 16.353 | 10.04  |
| 302 | H40 | 7.998  | 14.496 | 11.121 |
| 303 | H41 | 9.145  | 13.284 | 10.592 |
| 304 | H42 | 7.55   | 12.905 | 8.541  |
| 305 | H43 | 8.605  | 14.305 | 8.571  |
| 306 | H3  | 8.022  | 5.832  | 11.871 |
| 307 | H6  | 11.349 | 5.413  | 8.198  |
| 308 | H20 | 9.847  | 20.043 | 11.494 |

|     |      |        |        |        |
|-----|------|--------|--------|--------|
| 309 | H23  | 5.17   | 18.446 | 11.901 |
| 310 | H36  | 8.756  | 6.118  | 15.348 |
| 311 | H39  | 11.283 | 6.149  | 19.62  |
| 312 | H43  | 12.854 | 9.853  | 13.022 |
| 313 | H46  | 8.308  | 7.996  | 13.66  |
| 314 | H50  | 12.286 | 1.554  | 13.798 |
| 315 | H53  | 7.992  | 4.015  | 13.876 |
| 316 | H64  | -1.873 | 3.131  | 7.695  |
| 317 | H66  | -0.99  | 6.737  | 8.478  |
| 318 | H69  | -3.525 | 5.868  | 4.295  |
| 319 | H83  | 3.246  | 17.945 | 9.598  |
| 320 | H86  | 3.755  | 22.774 | 8.634  |
| 321 | H93  | 1.98   | 18.912 | 11.825 |
| 322 | H97  | 3.701  | 22.849 | 14.657 |
| 323 | CH00 | 3.729  | 17.912 | 14.342 |
| 324 | CH12 | -0.546 | 9.021  | 9.712  |
| 325 | CH15 | -5.256 | 10.566 | 9.59   |
| 326 | CH18 | -1.348 | 7.129  | 11.804 |
| 327 | CH21 | -3.075 | 8.241  | 16.323 |
| 328 | CH26 | -5.627 | 3.564  | 10.555 |
| 329 | CH29 | -0.845 | 4.816  | 10.743 |
| 330 | H1   | 5.031  | 16.774 | 10.039 |
| 331 | C1   | 3.111  | 6.769  | 9.07   |
| 332 | C2   | 3.846  | 6.162  | 10.267 |
| 333 | C3   | 3.599  | 6.976  | 11.538 |
| 334 | C4   | 4.274  | 6.333  | 12.752 |
| 335 | C5   | 4.208  | 7.204  | 14.01  |
| 336 | C6   | 2.779  | 7.47   | 14.486 |
| 337 | C7   | 2.758  | 8.232  | 15.811 |
| 338 | C8   | 1.325  | 8.507  | 16.269 |
| 339 | C9   | 1.302  | 9.274  | 17.591 |
| 340 | C10  | 3.388  | 5.98   | 7.792  |
| 341 | C11  | 2.635  | 6.558  | 6.605  |
| 342 | C12  | -0.121 | 9.562  | 18.041 |
| 343 | H2   | 2.033  | 6.783  | 9.27   |
| 344 | H3   | 3.426  | 7.811  | 8.934  |
| 345 | H4   | 4.922  | 6.123  | 10.06  |
| 346 | H5   | 3.508  | 5.131  | 10.419 |
| 347 | H6   | 2.519  | 7.051  | 11.709 |
| 348 | H7   | 3.979  | 7.995  | 11.399 |
| 349 | H8   | 5.329  | 6.14   | 12.523 |
| 350 | H9   | 3.815  | 5.358  | 12.954 |
| 351 | H10  | 4.717  | 8.157  | 13.821 |
| 352 | H11  | 4.768  | 6.699  | 14.807 |
| 353 | H12  | 2.251  | 6.519  | 14.604 |
| 354 | H13  | 2.235  | 8.048  | 13.732 |
| 355 | H14  | 3.287  | 7.653  | 16.578 |
| 356 | H15  | 3.291  | 9.183  | 15.696 |
| 357 | H16  | 0.799  | 9.086  | 15.502 |
| 358 | H17  | 0.787  | 7.559  | 16.385 |
| 359 | H18  | 1.814  | 8.693  | 18.366 |
| 360 | H19  | 1.844  | 10.221 | 17.482 |
| 361 | H20  | 4.463  | 5.989  | 7.576  |
| 362 | H21  | 3.094  | 4.933  | 7.927  |
| 363 | H22  | 2.863  | 5.989  | 5.698  |
| 364 | H23  | 1.555  | 6.515  | 6.769  |
| 365 | H24  | 2.916  | 7.602  | 6.431  |
| 366 | H25  | -0.116 | 10.098 | 18.995 |
| 367 | H26  | -0.645 | 10.183 | 17.307 |
| 368 | H27  | -0.687 | 8.635  | 18.174 |

## References

- [1] D. Shimoyama, R. Sekiya, H. Kudo, T. Haino, *Org. Lett.* **2020**, *22*, 352-356.
- [2] F. Mohamadi, N. G. J. Richards, W. C. Guida, R. Liskamp, M. Lipton, C. Caufield, G. Chang, T. Hendrickson, W. C. Still, *J. Comput. Chem.* **1990**, *11*, 440-467.
- [3] G. M. Sheldrick, *Acta Crystallogr., Sect. A: Found. Adv.*, **2015**, *71*, 3–8.
- [4] A. L. Spek, *Acta Crystallogr., Sect. C: Struct. Chem.*, **2015**, *71*, 9–18.
